# Supplementary material for: Cascading impacts of food loss and waste on biodiversity through agricultural land use
Source: Research Square preprint supplement (doi:10.21203/rs.3.rs-5048002/v1), 2024-09-30
Supplement: Supplementary file 1 [file 138c1e6b6a70fb50a48585d6.docx]

# Supplementary Information

**Cascading impacts of food loss and waste on biodiversity through agricultural land use**

Guoan Xiao1,2, Liangjie Xin1*, Xiaoyu Liu1,2, Jiexin Deng2,3, Xue Wang1, Xiubin Li1, Minghong Tan1

1*Key Laboratory of Land Surface Pattern and Simulation, Institute of Geographic Sciences and Natural Resources Research, Chinese Academy of Sciences, Beijing, China.*

2*College of Resources and Environment, University of Chinese Academy of Sciences, Beijing, China.*

3*Key Lab of Urban Environment and Health, Institute of Urban Environment, Chinese Academy of Sciences, Xiamen, China.*

*Corresponding author

*E-mail address:* [xinlj@igsnrr.ac.cn](mailto:xinlj@igsnrr.ac.cn)

**This file includes:**

Supplementary Text 1 – 3

Supplementary Figure 1 – 9

Supplementary Table 1 – 7

# S.1. Study framework

The study framework can be divided into three modules (Supplementary Figure 1): food loss and waste (FLW), land footprint, and biodiversity. We first obtained food production data from FAOSTAT1 and fed it into the multi-region input-output (MRIO) framework. Food consumption was calculated by subtracting exports from production and adding imports. The consumption data was then combined with FLW percentage data obtained from the literature review and the FAO FLW database2 to produce a new FLW database in million tonnes. We tracked the FLW flows in the supply-demand matrix provided by the MRIO framework and traced the countries where the food lost and wasted was actually produced. Here, the Food and Agriculture Biomass Input-Output (FABIO) model3 was used to obtain the food flow by weight, and the resolved MRIO (R-MRIO) model4 was used to obtain main matrices, such as the life cycle land use coefficient matrix. The global MRIO models can output virtual land flows, that is, trade-embedded and non-traded land footprints. We assume that land transformations associated with FLW for crops and meat are from cropland and pasture to extensive forestry, respectively. The potential biodiversity losses were then calculated by characterization factors5 (CFs). To explore where prioritizing FLW reduction measures can achieve higher benefits, we established four scenarios in the Global Trade Analysis Project (GTAP) model6, including halving FLW in all countries, halving FLW in the top ten countries with the highest FLW, halving FLW in meat and animal products, and halving FLW in 40 countries above biodiversity hotspots. Finally, we can get information on resource conservation and their distribution in various countries.


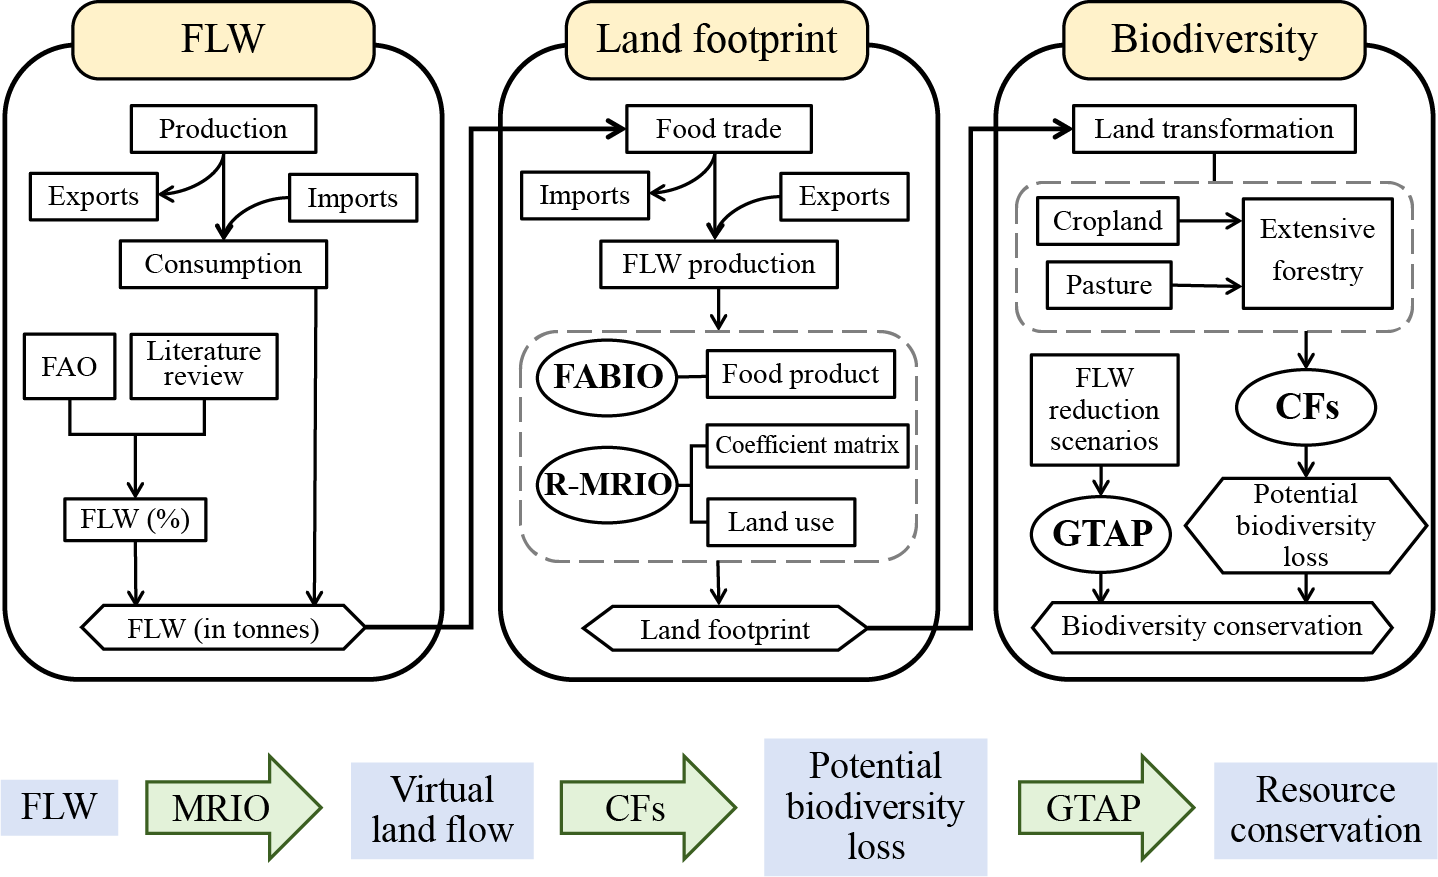


**Supplementary Figure 1 | Schematic diagram of the methodological framework.** Cascading impacts of FLW on agricultural land use and biodiversity. The FLW production is the food lost and wasted from domestic production minus imports plus exports, that is, the food actually produced by the country but lost and wasted by it and its exporters. The FABIO is the physical Food and Agriculture Biomass Input-Output model3. The R-MRIO is a highly resolved Multi-Regional Input-Output model4. The CFs are the characterization factors of biodiversity5. The GTAP is the Global Trade Analysis Project model6.

# S.2. Tracing FLW in global MRIO framework

Food trade may result in different locations for food production and food lost and wasted. This circulation process is determined by the relationship between supply and demand, which can be represented by the following equations:

where is the transactions matrix with elements (flows), denoting the cost share of commodity supplied by region in the production process of commodity produced in region ; is the coefficient matrix with elements ; is the total output vector with elements , corresponding the output of commodity in region ; is the matrix of final demand with elements , denoting the direct final consumption of commodity produced in region and consumed in region ; **1** represents the vector of ‘1’ with a dimension . Solving for leads to the following equation：

where is the identity matrix and is the Leontief inverse, representing the total amount of direct and indirect inputs required to satisfy one unit of final demand.

# S.3. Scenario Modeling

In the FLW reduction scenarios, although global FLW and related land footprint could be eliminated by reducing 100% of FLW in all countries, the actual distribution among countries is likely to be uneven. For example, if 100 countries produce 10 Mt of FLW in their original food production, the total amount of food saved after completely eliminating FLW is 1,000 Mt, but not all countries will necessarily reduce their food production by 10 Mt. Because if country A completely eliminates FLW, it should give priority to reducing the share of food imports from some countries from a policy or cost-benefit perspective, rather than just ‘returning’ the part of food that was originally wasted from various countries to each exporting country, and the GTAP model can simulate this process. Therefore, the phenomenon that some countries in the FLW reduction scenario have negatively wasted resources in Supplementary Table 5 means that their reduced domestic production and export shares not only make up for the resource losses caused by FLW but also supplement the food that was not wasted and lost. However, since the GTAP model does not directly provide shock options related to reducing food waste, we chose ‘intermediate input product technology’ to reflect the improved efficiency of food production, which may not fully reflect the response of countries to actual FLW reductions.


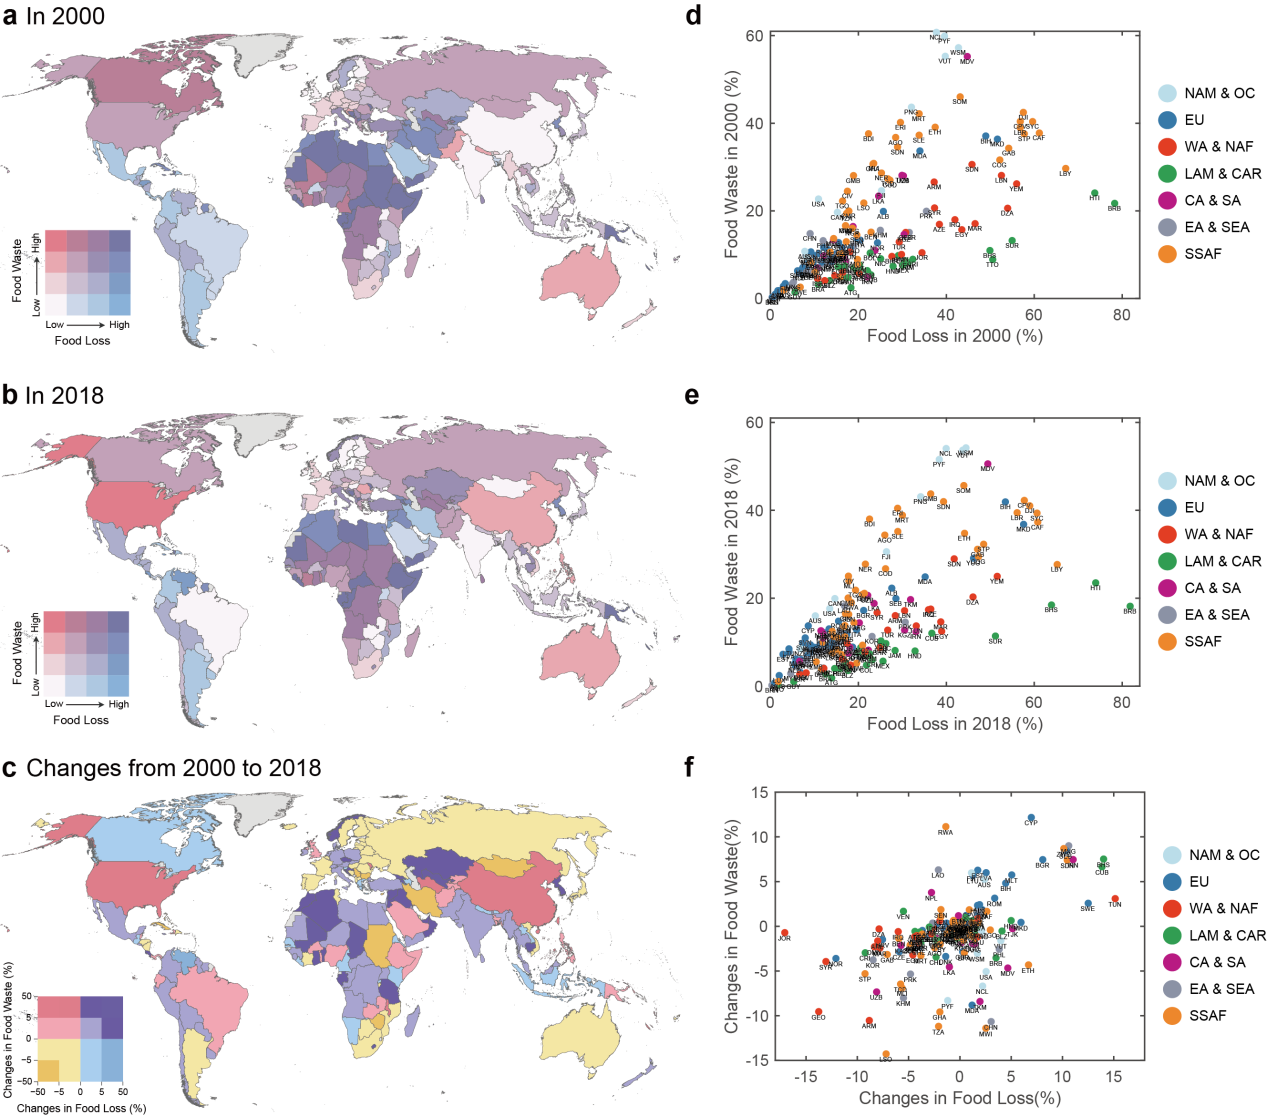


**Supplementary Figure 2 | Spatio-temporal distribution of ratios of food loss and food waste. a,b,** Quartile distribution of ratios of food loss and food waste in 2000 (**a**) and in 2018 (**b**). Ratios of food loss and food waste are expressed in percentages. Countries in grey were not included in the study. **c,** Quartile distribution of changes of ratios from 2000 to 2018. **d,e,** Ratios of food loss and food waste by country in 2000 (**d**) and in 2018 (**e**). The color denotes the geographic regions. **f,** Changes of ratios by country from 2000 to 2018. The country abbreviations are taken from the ISO-alpha3 code (<https://unstats.un.org/unsd/methodology/m49/>). NAM + OC: Northern America and Oceania; EU: Europe; WA + NAF: Western Asia and Northern Africa; LAM + CAR: Latin America and the Caribbean; CA + SA: Central Asia and Southern Asia; EA + SEA: Eastern Asia and South-eastern Asia; SSAF: Sub-Saharan Africa.


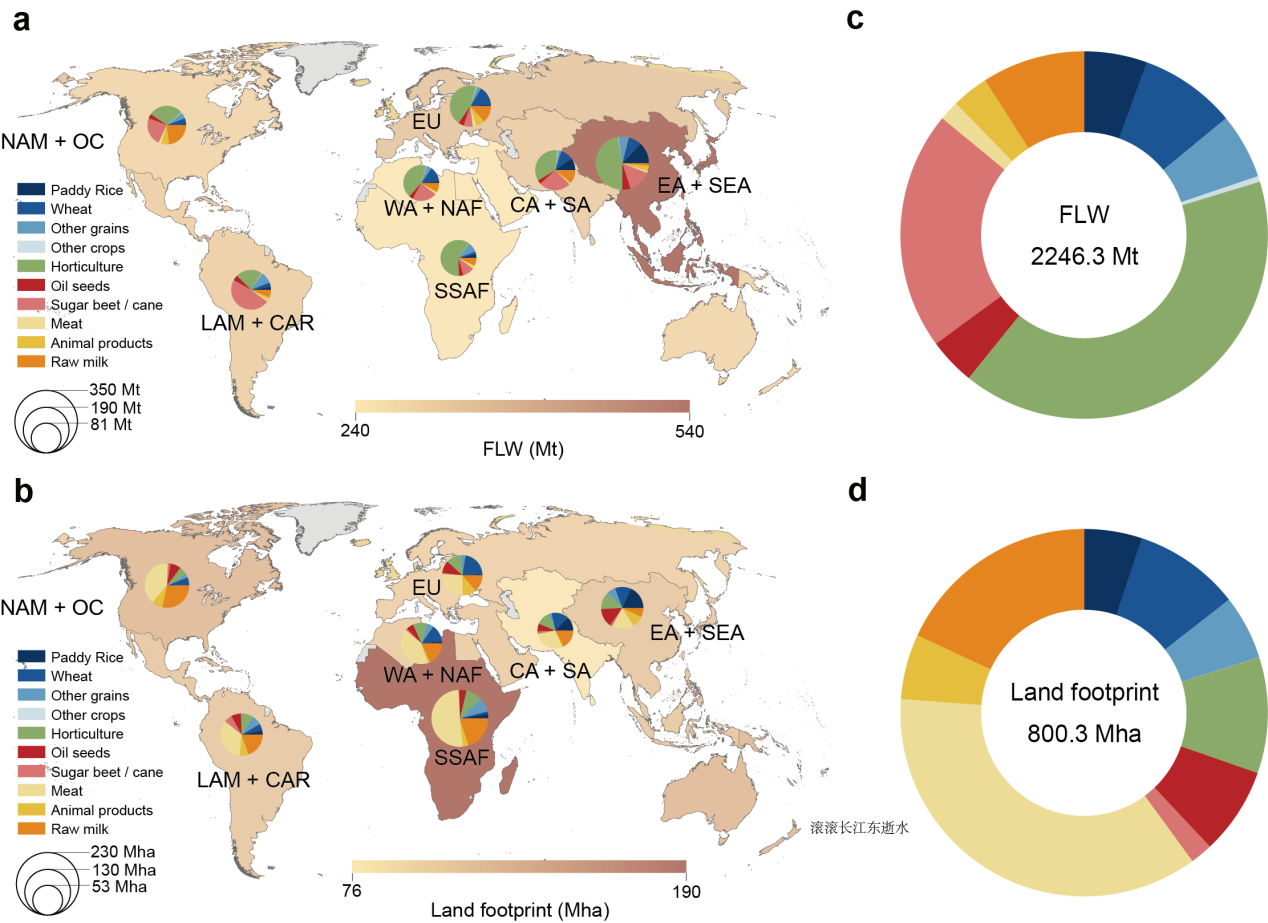


**Supplementary Figure 3 | FLW and land footprint by food groups and geographic regions in 2018. a,b,** The pie chart shows FLW (**a**) and land footprint (**b**) by food groups in each geographic region. The background map shows the amount of FLW (**a**) and land footprint (**b**). The geographical regions are classified according to the Standard Country or Area Codes for Statistical Use (M49)7, the country lists can be found at <https://unstats.un.org/unsd/methodology/m49/>. **c,d,** Global FLW (**c**) and land footprint (**d**) by food groups. The manuscript categorizes the 10 food groups as follows: ‘Cereals and others’ includes paddy rice, wheat, other grains, and other crops; ‘Horticulture’ includes horticulture; ‘Oil and sugar crops’ includes oil seeds and sugar beet and sugar cane; ‘Meat and dairy’ includes meat, other animal products, and raw milk. A detailed sectoral list of the 10 food groups can be found at <https://www.gtap.agecon.purdue.edu/databases/contribute/detailedsector.asp>.


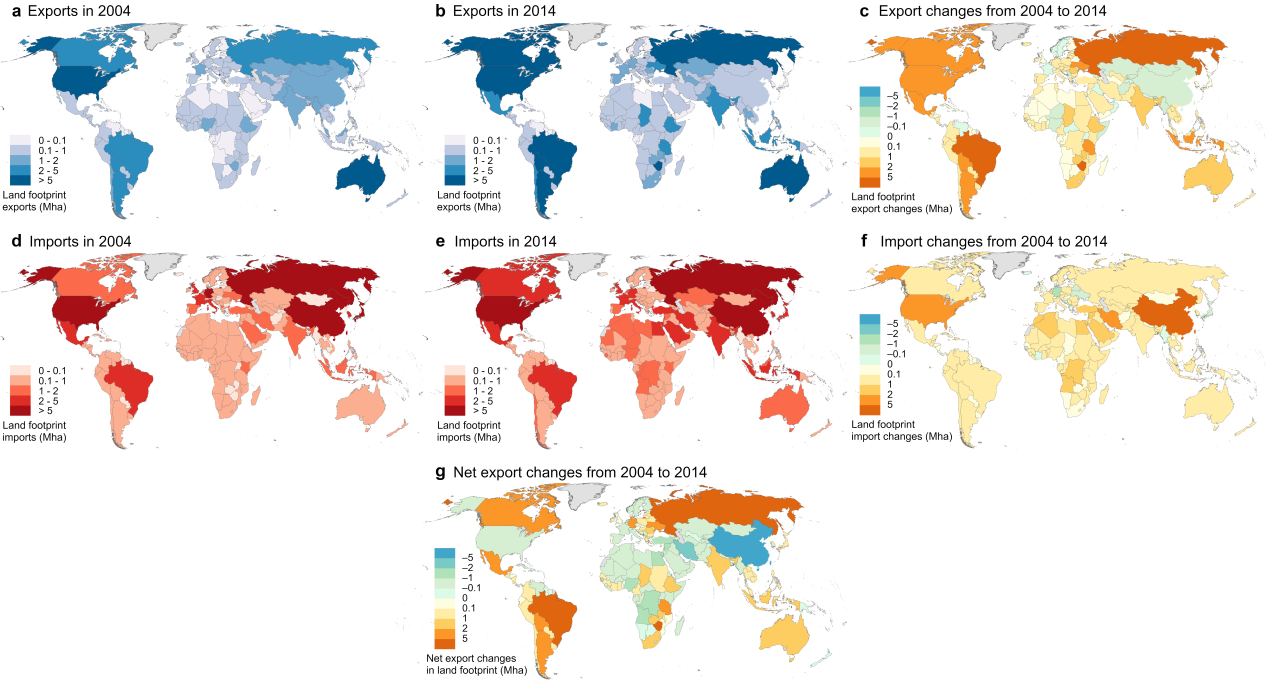


**Supplementary Figure 4 | Spatiotemporal characteristics of land footprint embedded in global food trade. a,** Land footprint exports in 2000. **b,** Land footprint exports in 2018. **c,** Changes in land footprint exports from 2000 to 2018. **d,** Land footprint imports in 2000. **e,** Land footprint imports in 2018. **f,** Changes in land footprint imports from 2000 to 2018. **g,** Changes in net land footprint exports from 2000 to 2018 (changes in export-embedded land footprint minus changes in import-embedded land footprint).


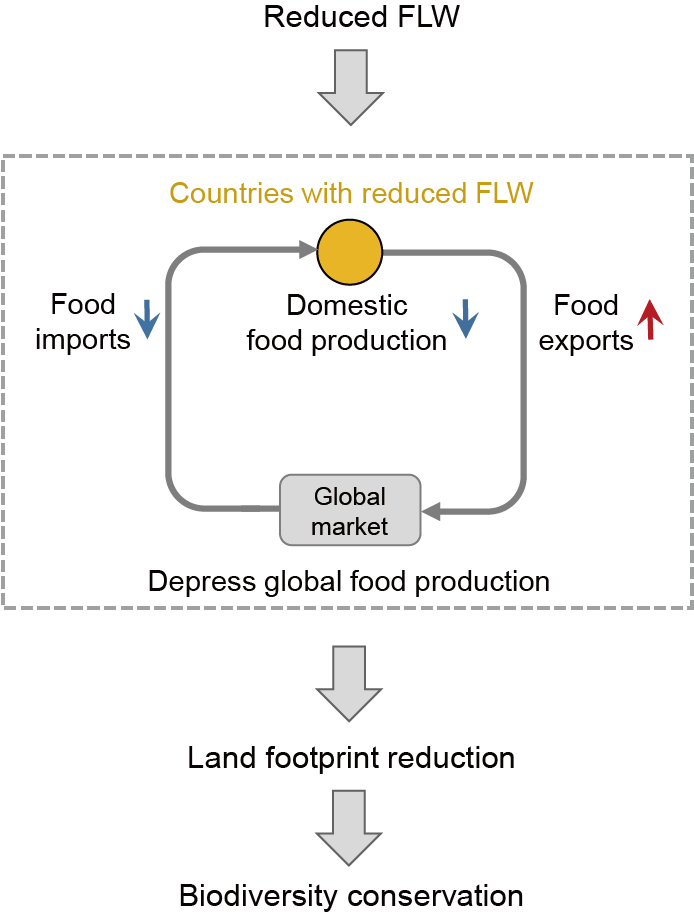


**Supplementary Figure 5 | Cascading mechanisms triggered by FLW reduction**. FLW reduction would depress domestic food production and imports and enhance food exports, triggering a cascading effect that contracted global food production scale through global food trade, thereby stimulating land abandonment and curbing cropland expansion to conserve biodiversity.


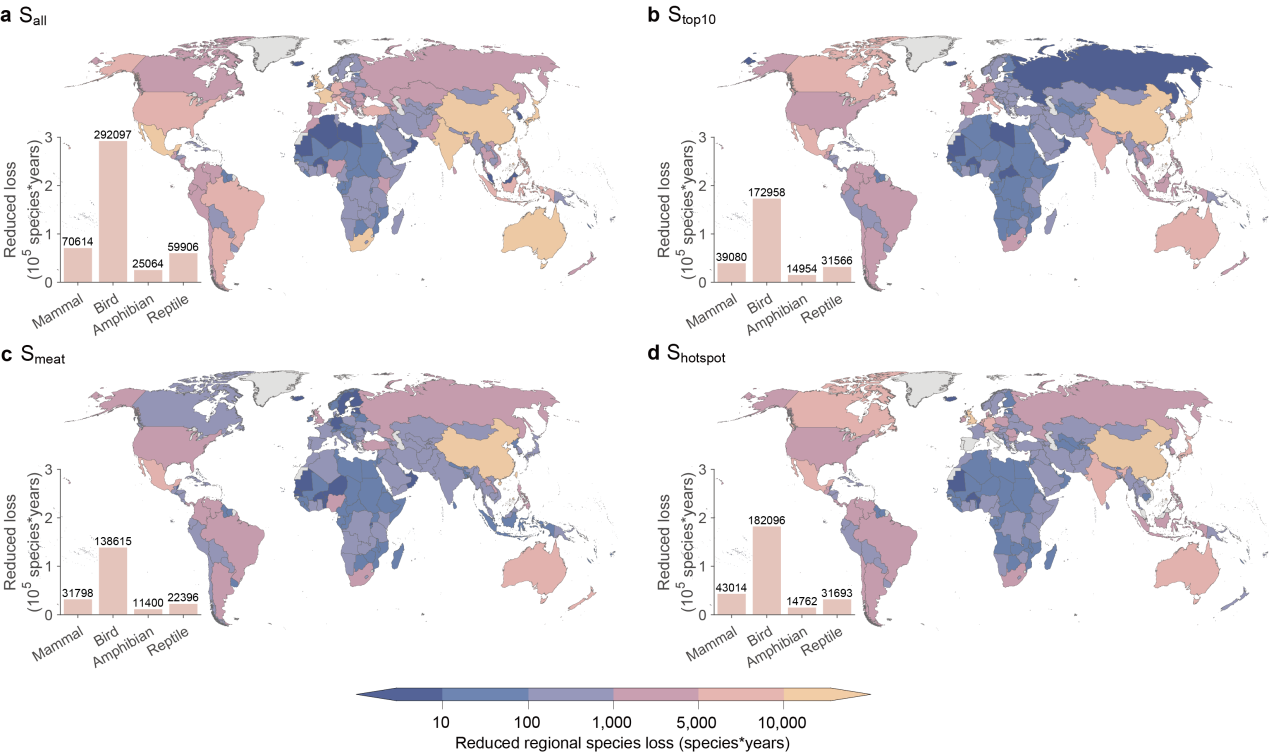


**Supplementary Figure 6 | Reduced regional species loss by countries and regions.** The map shows the total reduced regional species loss in species*years. The bar shows the amount of reduced regional species loss by four taxa, namely, mammal, bird, amphibian, and reptile. **a,** Sall. **b,** Stop10. **c,** Smeat. **d,** Shotspot. The top seven countries account for 49.3% of the average reduction in regional species loss across all scenarios, including China (23.8%), United Kingdom (6.5%), Mexico (4.8%), Australia (4.8%), Japan (3.9%), South Africa (2.8%), and India (2.7%).


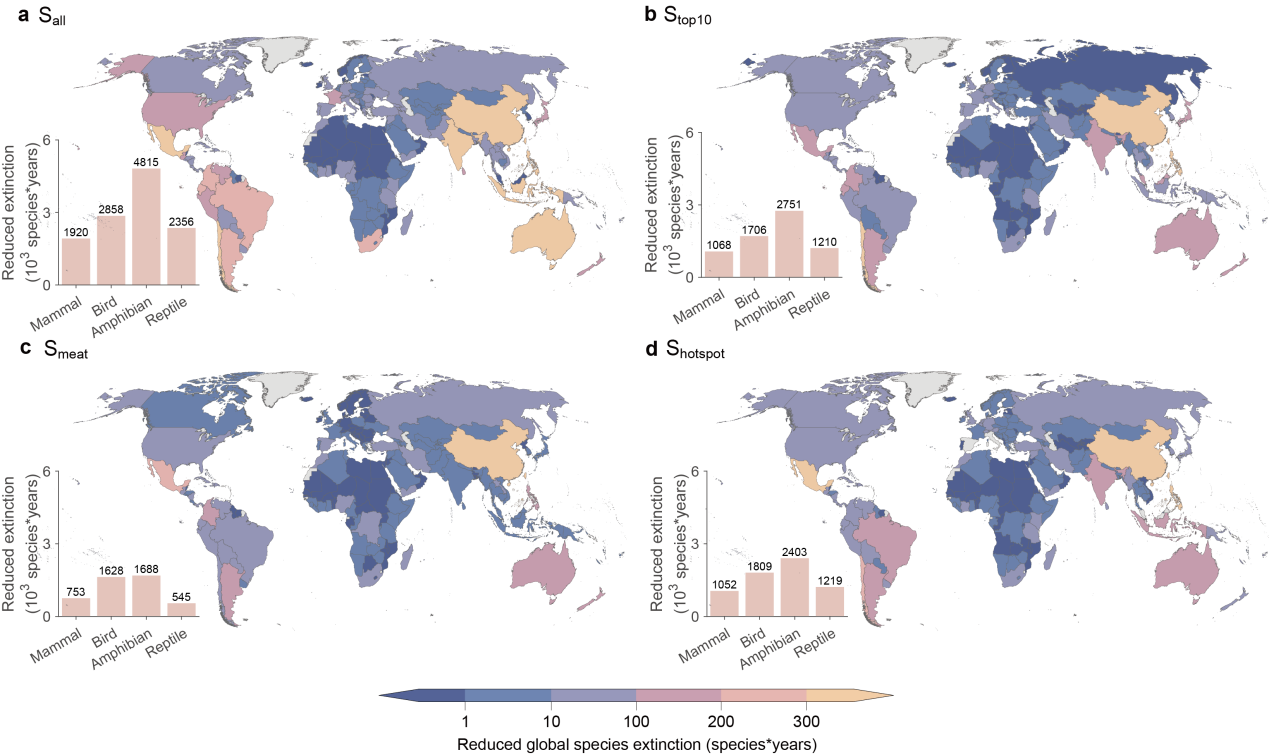


**Supplementary Figure 7 | Reduced global species extinction by countries and regions.** The map shows the total reduced global species extinction in species*years. The bar shows the amount of reduced global species extinction by four taxa, namely, mammal, bird, amphibian, and reptile. **a,** Sall. **b,** Stop10. **c,** Smeat. **d,** Shotspot. The top seven countries account for 49.3% of the average reduction in global species extinction across all scenarios, including China (19.0%), the Philippines (7.3%), Mexico (7.1%), Chile (6.5%), Australia (4.1%), Argentina (3.4%), and India (3.4%).


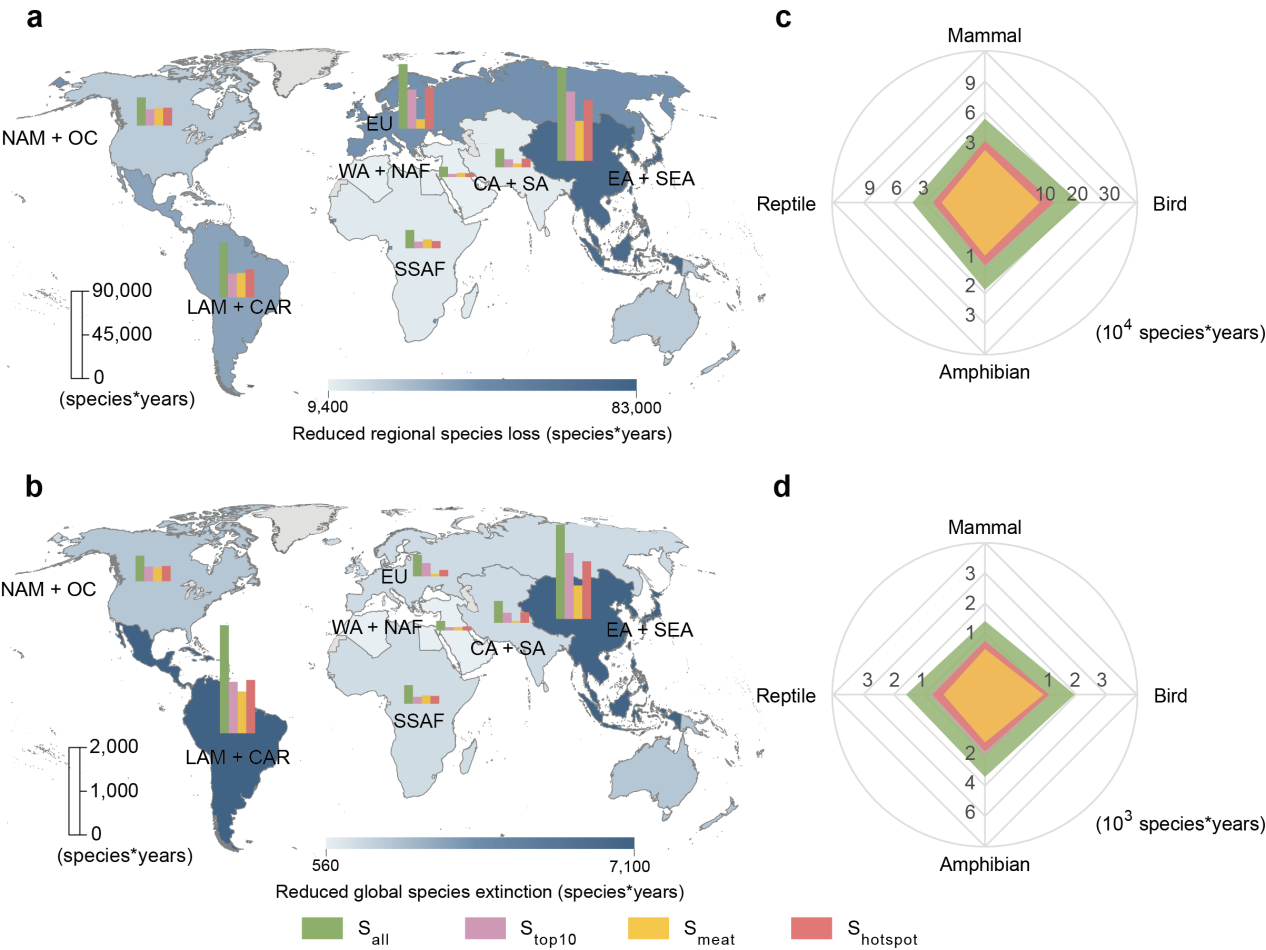


**Supplementary Figure 8 | Biodiversity conservation by geographical regions and taxa. a,b,** The bar chart shows reduced regional species loss (**a**) and global species extinction (**b**) under Sall, Stop10, Smeat, and Shotspot. The background map shows the mean value of reduced biodiversity loss under four scenarios. **c,d,** Reduced regional species loss (**c**) and global species extinction (**d**) by taxa under four scenarios.


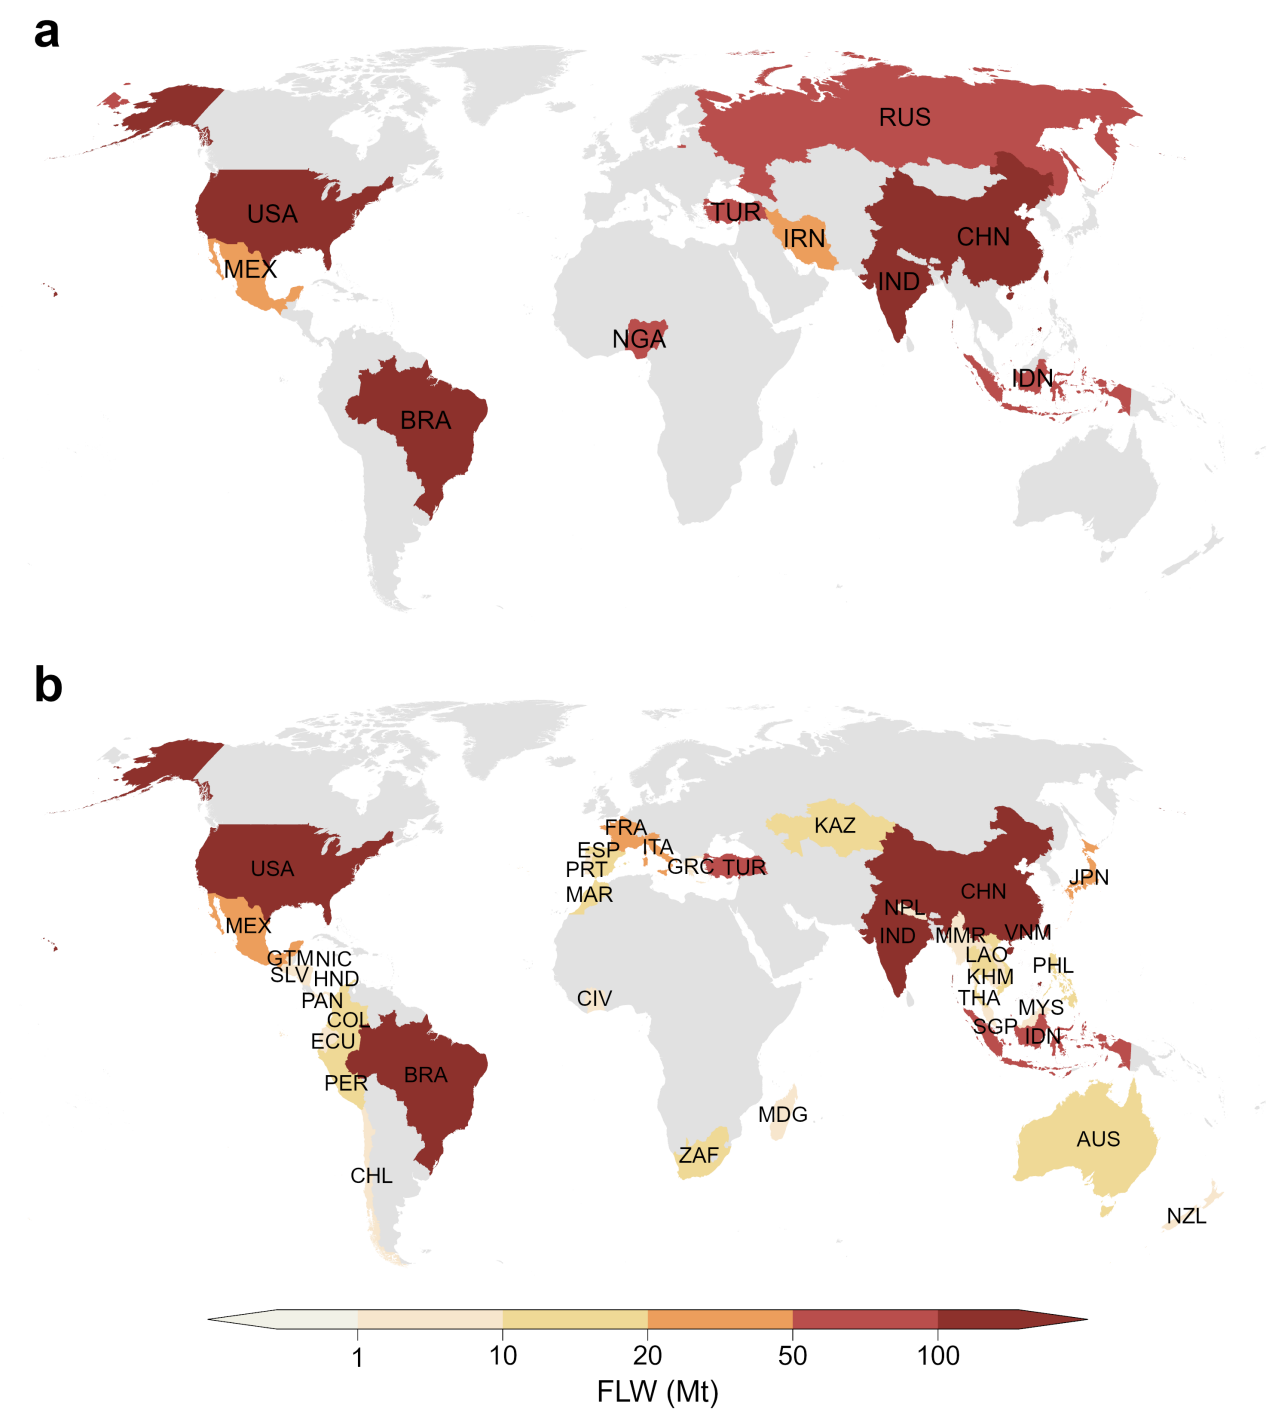


**Supplementary Figure 9 | Countries involved in selected scenarios. a,** The top 10 countries with the highest FLW, accounting for 54.2% of global FLW (1,216.6 Mt). **b,** The 40 countries with biodiversity hotspots, account for 60.6% of global FLW (1,361.4 Mt). The map shows FLW in million tonnes. The biodiversity hotspot map is available at <https://zenodo.org/records/4311850>.

**Supplementary Table 1. Sourcing of FLW flows (Million Tons) by country in 2018.**

| Description of countries and regions | ISO-alpha3 code | FLW generated from domestic production (of domestically produced and exported food) | Export-embedded FLW | Import-embedded FLW | FLW generated from domestic consumption (of domestically produced and imported food) |
| --- | --- | --- | --- | --- | --- |
| Austria | AUT | 3.44 | 1.38 | 1.61 | 3.67 |
| Belgium | BEL | 4.17 | 2.42 | 3.68 | 5.42 |
| Bulgaria | BGR | 4.93 | 2.45 | 0.93 | 3.4 |
| Cyprus | CYP | 2.33 | 1.44 | 0.16 | 1.04 |
| Czech Republic | CZE | 3.72 | 0.96 | 1.59 | 4.35 |
| Germany | DEU | 20.35 | 5.79 | 17.43 | 31.99 |
| Denmark | DNK | 5.5 | 2.48 | 0.86 | 3.88 |
| Estonia | EST | 1.28 | 0.77 | 0.11 | 0.62 |
| Spain | ESP | 17.43 | 7.31 | 7.12 | 17.24 |
| Finland | FIN | 1.68 | 0.2 | 0.65 | 2.13 |
| France | FRA | 26.27 | 11.18 | 10.8 | 25.89 |
| Greece | GRC | 5.33 | 1.44 | 1.78 | 5.67 |
| Croatia | HRV | 3.12 | 1.04 | 0.5 | 2.58 |
| Hungary | HUN | 4.38 | 2.37 | 0.64 | 2.65 |
| Ireland | IRL | 2.89 | 1.77 | 1.08 | 2.2 |
| Italy | ITA | 22.17 | 2.8 | 13.81 | 33.18 |
| Lithuania | LTU | 1.78 | 0.9 | 0.29 | 1.17 |
| Luxembourg | LUX | 0.64 | 0.55 | 0.2 | 0.28 |
| Latvia | LVA | 1.56 | 1.06 | 0.21 | 0.71 |
| Malta | MLT | 0.19 | 0.15 | 0.06 | 0.09 |
| Netherlands | NLD | 5.66 | 3.83 | 5.01 | 6.85 |
| Poland | POL | 16.75 | 4.06 | 3.05 | 15.73 |
| Portugal | PRT | 4.29 | 0.86 | 2.57 | 6 |
| Romania | ROM | 10.39 | 3.84 | 1.7 | 8.24 |
| Sweden | SWE | 2.73 | 0.58 | 2.56 | 4.71 |
| Slovenia | SVN | 2.51 | 0.95 | 0.46 | 2.02 |
| Slovakia | SVK | 2.02 | 0.72 | 0.78 | 2.08 |
| United Kingdom | GBR | 9.65 | 1.86 | 9.12 | 16.91 |
| United States | USA | 203.39 | 37.87 | 68.44 | 233.95 |
| Japan | JPN | 12.53 | 0.13 | 18.04 | 30.44 |
| China | CHN | 296.89 | 6.85 | 57.17 | 347.21 |
| Canada | CAN | 27.67 | 12.96 | 13.71 | 28.42 |
| Republic of Korea | KOR | 10.63 | 0.09 | 16.11 | 26.65 |
| Brazil | BRA | 168.99 | 32.71 | 6.84 | 143.11 |
| India | IND | 165.06 | 20.89 | 12.23 | 156.4 |
| Mexico | MEX | 58.71 | 21.95 | 7.43 | 44.18 |
| Russian Federation | RUS | 65.6 | 15.95 | 17.12 | 66.77 |
| Australia | AUS | 23.84 | 9.86 | 3.67 | 17.65 |
| Switzerland | CHE | 1.84 | 0.37 | 0.98 | 2.44 |
| Turkey | TUR | 55.36 | 4.4 | 7.91 | 58.87 |
| Norway | NOR | 0.86 | 0.06 | 1.5 | 2.3 |
| Indonesia | IDN | 57.44 | 11.04 | 6.95 | 53.35 |
| South Africa | ZAF | 12.25 | 3.43 | 1.47 | 10.29 |
| Afghanistan | AFG | 3.45 | 0.4 | 0.24 | 3.3 |
| Armenia | ARM | 1.34 | 0.2 | 0.37 | 1.51 |
| Azerbaijan | AZE | 4.88 | 1.05 | 1.07 | 4.9 |
| Bangladesh | BGD | 23.47 | 3.03 | 1.11 | 21.55 |
| Bhutan | BTN | 0.43 | 0.15 | 0.44 | 0.72 |
| Brunei | BRN | 0.38 | 0.31 | 0.05 | 0.11 |
| Cambodia | KHM | 6.78 | 3.38 | 0.18 | 3.58 |
| Democratic People's Republic of Korea | PRK | 2.96 | 1.34 | 0.16 | 1.79 |
| Fiji | FJI | 2.47 | 1.82 | 0.22 | 0.86 |
| French Polynesia | PYF | 0.05 | 0 | 0.31 | 0.36 |
| Georgia | GEO | 1.48 | 0.43 | 0.91 | 1.96 |
| Kazakhstan | KAZ | 10.25 | 1.79 | 4.11 | 12.57 |
| Kyrgyzstan | KGZ | 3.03 | 0.54 | 1.01 | 3.51 |
| Laos | LAO | 3.45 | 2.47 | 0.08 | 1.06 |
| Malaysia | MYS | 17.06 | 14.87 | 5.94 | 8.13 |
| Maldives | MDV | 0.01 | 0 | 0.26 | 0.27 |
| Mongolia | MNG | 0.45 | 0.15 | 0.25 | 0.55 |
| Myanmar | MMR | 10.77 | 3.18 | 0.04 | 7.62 |
| Nepal | NPL | 4.96 | 1.84 | 0.23 | 3.35 |
| New Caledonia | NCL | 0.04 | 0 | 0.26 | 0.3 |
| New Zealand | NZL | 3.94 | 3.08 | 2.54 | 3.4 |
| Pakistan | PAK | 46.5 | 13.13 | 1.81 | 35.18 |
| Papua New Guinea | PNG | 2.13 | 1.64 | 0.39 | 0.88 |
| Philippines | PHL | 22.9 | 7.8 | 3.32 | 18.42 |
| Samoa | WSM | 0.09 | 0 | 0.14 | 0.22 |
| Singapore | SGP | 4.46 | 3.71 | 3.01 | 3.76 |
| Srilanka | LKA | 3.87 | 2.16 | 1.16 | 2.87 |
| Tajikistan | TJK | 3.42 | 2.42 | 0.48 | 1.48 |
| Thailand | THA | 47.74 | 31.32 | 2.48 | 18.89 |
| Turkmenistan | TKM | 2.47 | 0.85 | 2.15 | 3.77 |
| Uzbekistan | UZB | 16.15 | 3.89 | 1.57 | 13.83 |
| Vanuatu | VUT | 0.13 | 0.02 | 0.18 | 0.28 |
| Viet Nam | VNM | 25.43 | 9.21 | 1.51 | 17.73 |
| Antigua and Barbuda | ATG | 7.13 | 2.55 | 0.17 | 4.75 |
| Argentina | ARG | 32.09 | 14.89 | 3.27 | 20.47 |
| Barbados | BRB | 0.06 | 0.04 | 0.69 | 0.71 |
| Belize | BLZ | 0.75 | 0.61 | 0.06 | 0.2 |
| Bolivia | BOL | 5.25 | 3.55 | 0.72 | 2.42 |
| Chile | CHL | 3.28 | 1.59 | 2.1 | 3.79 |
| Colombia | COL | 18.27 | 2.65 | 2.62 | 18.24 |
| Costa Rica | CRI | 4.92 | 3.51 | 0.44 | 1.85 |
| Cuba | CUB | 9.16 | 1.19 | 0.65 | 8.61 |
| Ecuador | ECU | 6.2 | 2.93 | 0.72 | 3.98 |
| El Salvador | SLV | 2.58 | 1.03 | 0.37 | 1.92 |
| Guatemala | GTM | 5.2 | 2.48 | 1.13 | 3.84 |
| Guyana | GUY | 0.34 | 0.04 | 0.46 | 0.75 |
| Haiti | HTI | 4.15 | 0.81 | 0.34 | 3.68 |
| Honduras | HND | 4.24 | 1.65 | 0.62 | 3.22 |
| Jamaica | JAM | 1.02 | 0.49 | 0.52 | 1.05 |
| Nicaragua | NIC | 2.01 | 1.13 | 0.36 | 1.23 |
| Panama | PAN | 1.44 | 0.52 | 0.45 | 1.37 |
| Paraguay | PRY | 4.7 | 1.51 | 0.38 | 3.57 |
| Peru | PER | 13 | 2.2 | 1.27 | 12.08 |
| Suriname | SUR | 0.21 | 0.04 | 0.35 | 0.52 |
| Trinidad and Tobago | TTO | 4.77 | 4.44 | 0.15 | 0.48 |
| Uruguay | URY | 1.42 | 0.68 | 0.72 | 1.45 |
| Venezuela | VEN | 5.34 | 0.12 | 2.26 | 7.48 |
| Albania | ALB | 2.06 | 0.57 | 0.23 | 1.73 |
| Belarus | BLR | 5.89 | 2.34 | 0.35 | 3.9 |
| Bosnia and Herzegovina | BIH | 2.84 | 0.34 | 1.06 | 3.56 |
| Iceland | ISL | 0.52 | 0.44 | 0.05 | 0.14 |
| Montenegro | YUG | 0.29 | 0.03 | 0.96 | 1.22 |
| Moldova | MDA | 2.33 | 1.38 | 0.03 | 0.98 |
| Serbia | SEB | 5.22 | 2.27 | 2.55 | 5.5 |
| The Former Yugoslav Republic of Macedonia | MKD | 2.07 | 0.28 | 0.72 | 2.5 |
| Ukraine | UKR | 29.82 | 9.79 | 1.25 | 21.28 |
| Algeria | DZA | 22.5 | 0.23 | 6.88 | 29.16 |
| Angola | AGO | 13.13 | 0.13 | 3.22 | 16.23 |
| Bahamas | BHS | 0.19 | 0.02 | 1.18 | 1.35 |
| Benin | BEN | 3.66 | 0.7 | 0.32 | 3.29 |
| Botswana | BWA | 0.2 | 0.01 | 0.35 | 0.54 |
| Burkina Faso | BFA | 2.64 | 0.28 | 0.6 | 2.95 |
| Burundi | BDI | 3.99 | 0.37 | 0.89 | 4.51 |
| Cameroon | CMR | 9.2 | 2.44 | 0.48 | 7.24 |
| Cape Verde | CPV | 0.17 | 0.02 | 0.96 | 1.1 |
| Central African Republic | CAF | 3.06 | 0.3 | 0.67 | 3.44 |
| Chad | TCD | 2.38 | 0.65 | 0.43 | 2.16 |
| Congo | COG | 2.16 | 0.16 | 1.3 | 3.31 |
| Cote d'Ivoire | CIV | 8.26 | 4.13 | 0.51 | 4.64 |
| The Democratic Republic of the Congo | COD | 27.98 | 1.35 | 2.39 | 29.03 |
| Djibouti | DJI | 0.13 | 0.04 | 0.79 | 0.88 |
| Dominican Republic | DOM | 5.35 | 1 | 0.98 | 5.33 |
| Eritrea | ERI | 0.41 | 0.04 | 0.5 | 0.88 |
| Ethiopia | ETH | 8.16 | 8.11 | 1.46 | 1.5 |
| Gabon | GAB | 1.19 | 0.11 | 1.37 | 2.45 |
| Gambia | GMB | 0.21 | 0.03 | 0.46 | 0.64 |
| Ghana | GHA | 12.68 | 6.62 | 1.26 | 7.31 |
| Guinea | GIN | 3.14 | 0.7 | 0.4 | 2.84 |
| Kenya | KEN | 7.88 | 0.96 | 3.32 | 10.24 |
| Lesotho | LSO | 0.12 | 0.01 | 0.56 | 0.67 |
| Liberia | LBR | 0.92 | 0.42 | 1.07 | 1.58 |
| Libya | LBY | 2.47 | 0.02 | 2.24 | 4.7 |
| Madagascar | MDG | 4 | 2.35 | 0.31 | 1.97 |
| Malawi | MWI | 7.35 | 5.3 | 0.32 | 2.37 |
| Mali | MLI | 6.79 | 0.78 | 0.76 | 6.77 |
| Mauritania | MRT | 0.73 | 0.05 | 1.27 | 1.95 |
| Mauritius | MUS | 0.43 | 0.41 | 0.27 | 0.28 |
| Morocco | MAR | 16.5 | 1.91 | 4.16 | 18.74 |
| Mozambique | MOZ | 4.49 | 1.06 | 0.49 | 3.93 |
| Namibia | NAM | 0.36 | 0.1 | 0.42 | 0.69 |
| Niger | NER | 6.96 | 0.28 | 1.09 | 7.77 |
| Nigeria | NGA | 64.59 | 3.45 | 4.37 | 65.51 |
| Rwanda | RWA | 3.59 | 0.24 | 0.6 | 3.95 |
| Sao Tome and Principe | STP | 0.09 | 0.01 | 0.65 | 0.73 |
| Senegal | SEN | 3.11 | 0.53 | 0.63 | 3.2 |
| Seychelles | SYC | 0.01 | 0 | 0.88 | 0.89 |
| Sierra Leone | SLE | 2.61 | 0.12 | 1.35 | 3.84 |
| Somalia | SOM | 2.91 | 0.08 | 0.41 | 3.24 |
| South Sudan | SSD | 5.26 | 0.2 | 0.47 | 5.53 |
| Sudan | SDN | 21.24 | 0.13 | 0.32 | 21.43 |
| Togo | TGO | 1.33 | 1.32 | 0.48 | 0.49 |
| Tunisia | TUN | 4.37 | 0.7 | 3.77 | 7.44 |
| Uganda | UGA | 5.2 | 2.41 | 0.33 | 3.11 |
| Tanzania | TZA | 10.89 | 5.81 | 0.78 | 5.85 |
| Zambia | ZMB | 3 | 1.43 | 0.3 | 1.87 |
| Zimbabwe | ZWE | 3.6 | 3.43 | 0.34 | 0.5 |
| Bahrain | BHR | 0.04 | 0.01 | 0.77 | 0.8 |
| Egypt | EGY | 37.6 | 11.52 | 6.26 | 32.35 |
| Iran | IRN | 41.97 | 5.65 | 10.94 | 47.26 |
| Iraq | IRQ | 3.25 | 0.18 | 1.57 | 4.64 |
| Israel | ISR | 2.62 | 1.3 | 3.39 | 4.71 |
| Jordan | JOR | 1.25 | 0.57 | 1.8 | 2.49 |
| Kuwait | KWT | 0.15 | 0.04 | 2.2 | 2.31 |
| Lebanon | LBN | 1.86 | 0.86 | 6.23 | 7.22 |
| Oman | OMN | 0.69 | 0.62 | 1.84 | 1.9 |
| Qatar | QAT | 0.07 | 0 | 1.3 | 1.37 |
| Saudi Arabia | SAU | 3.03 | 0.37 | 13.46 | 16.13 |
| Syrian Arab Republic | SYR | 3.85 | 2.17 | 3.18 | 4.86 |
| Former USSR | - | 13.3 | 2.14 | 0.35 | 11.51 |
| United Arab Emirates | ARE | 0.33 | 0.19 | 5.55 | 5.69 |
| Yemen | YEM | 2.27 | 0.16 | 2.27 | 4.37 |

*Notes: Description of countries and regions can be found at:* [*https://www.resdc.cn/data.aspx?DATAID=205*](https://www.resdc.cn/data.aspx?DATAID=205)*. ISO-alpha3 code can be found at* [*https://unstats.un.org/unsd/methodology/m49/*](https://unstats.un.org/unsd/methodology/m49/)*.*

**Supplementary Table 2. Sourcing of land footprint flows (Million hectares) by country in 2018.**

| Description of countries and regions | ISO-alpha3 code | Land footprint generated from domestic production | Export-embedded land footprint | Import-embedded land footprint | Land footprint generated from domestic consumption |
| --- | --- | --- | --- | --- | --- |
| Austria | AUT | 0.64 | 0.28 | 0.39 | 0.75 |
| Belgium | BEL | 0.7 | 0.37 | 0.91 | 1.24 |
| Bulgaria | BGR | 1.36 | 0.63 | 0.22 | 0.95 |
| Cyprus | CYP | 1.77 | 1.36 | 0.05 | 0.47 |
| Czech Republic | CZE | 0.81 | 0.2 | 0.28 | 0.89 |
| Germany | DEU | 3.53 | 1.02 | 3.84 | 6.35 |
| Denmark | DNK | 0.63 | 0.31 | 0.19 | 0.51 |
| Estonia | EST | 0.52 | 0.31 | 0.05 | 0.26 |
| Spain | ESP | 3.46 | 1.19 | 1.77 | 4.04 |
| Finland | FIN | 0.56 | 0.1 | 0.31 | 0.77 |
| France | FRA | 4.2 | 1.6 | 3.05 | 5.65 |
| Greece | GRC | 1.35 | 0.53 | 0.56 | 1.38 |
| Croatia | HRV | 1.02 | 0.38 | 0.14 | 0.78 |
| Hungary | HUN | 1.11 | 0.68 | 0.13 | 0.57 |
| Ireland | IRL | 1.77 | 1.06 | 0.39 | 1.09 |
| Italy | ITA | 3.63 | 0.44 | 3.74 | 6.93 |
| Lithuania | LTU | 0.41 | 0.22 | 0.08 | 0.27 |
| Luxembourg | LUX | 0.25 | 0.22 | 0.12 | 0.15 |
| Latvia | LVA | 0.68 | 0.49 | 0.09 | 0.28 |
| Malta | MLT | 0.04 | 0.03 | 0.04 | 0.05 |
| Netherlands | NLD | 1.08 | 0.61 | 1.36 | 1.83 |
| Poland | POL | 2.1 | 0.58 | 0.69 | 2.21 |
| Portugal | PRT | 1.26 | 0.31 | 0.7 | 1.65 |
| Romania | ROM | 2.6 | 1.3 | 0.36 | 1.66 |
| Sweden | SWE | 0.91 | 0.19 | 0.5 | 1.22 |
| Slovenia | SVN | 0.42 | 0.12 | 0.14 | 0.43 |
| Slovakia | SVK | 0.55 | 0.21 | 0.17 | 0.51 |
| United Kingdom | GBR | 4.3 | 0.5 | 3.15 | 6.95 |
| United States | USA | 84.54 | 15.85 | 14 | 82.69 |
| Japan | JPN | 2.27 | 0.02 | 4.87 | 7.12 |
| China | CHN | 45.02 | 0.85 | 17.74 | 61.91 |
| Canada | CAN | 15.66 | 7.64 | 2.06 | 10.07 |
| Republic of Korea | KOR | 1.46 | 0.01 | 2.98 | 4.42 |
| Brazil | BRA | 41.61 | 8.61 | 3.19 | 36.19 |
| India | IND | 22.68 | 2.74 | 2.21 | 22.15 |
| Mexico | MEX | 20 | 3.8 | 3.36 | 19.56 |
| Russian Federation | RUS | 39.96 | 10.66 | 5.99 | 35.29 |
| Australia | AUS | 29.11 | 8.07 | 1 | 22.04 |
| Switzerland | CHE | 0.36 | 0.05 | 0.54 | 0.84 |
| Turkey | TUR | 7.77 | 0.58 | 3 | 10.19 |
| Norway | NOR | 0.2 | 0.01 | 0.69 | 0.89 |
| Indonesia | IDN | 12.01 | 2.68 | 2.24 | 11.57 |
| South Africa | ZAF | 18.64 | 1.7 | 0.71 | 17.66 |
| Afghanistan | AFG | 4.35 | 0.4 | 0.13 | 4.08 |
| Armenia | ARM | 0.44 | 0.09 | 0.13 | 0.48 |
| Azerbaijan | AZE | 1.44 | 0.23 | 0.29 | 1.5 |
| Bangladesh | BGD | 4.26 | 0.27 | 0.23 | 4.22 |
| Bhutan | BTN | 0.15 | 0.01 | 0.34 | 0.49 |
| Brunei | BRN | 0.13 | 0.08 | 0.02 | 0.07 |
| Cambodia | KHM | 1.32 | 0.43 | 0.06 | 0.95 |
| Democratic People's Republic of Korea | PRK | 0.55 | 0.17 | 0.04 | 0.41 |
| Fiji | FJI | 1.44 | 1.09 | 0.2 | 0.55 |
| French Polynesia | PYF | 0.06 | 0 | 0.22 | 0.27 |
| Georgia | GEO | 0.46 | 0.16 | 0.26 | 0.56 |
| Kazakhstan | KAZ | 12.21 | 1.12 | 1.14 | 12.23 |
| Kyrgyzstan | KGZ | 1.93 | 0.42 | 0.4 | 1.9 |
| Laos | LAO | 1.1 | 0.43 | 0.04 | 0.72 |
| Malaysia | MYS | 3.11 | 2.35 | 1.54 | 2.3 |
| Maldives | MDV | 0.01 | 0 | 0.16 | 0.17 |
| Mongolia | MNG | 3.51 | 0.71 | 0.12 | 2.92 |
| Myanmar | MMR | 1.98 | 0.41 | 0.01 | 1.58 |
| Nepal | NPL | 1.3 | 0.23 | 0.11 | 1.18 |
| New Caledonia | NCL | 0.17 | 0 | 0.24 | 0.41 |
| New Zealand | NZL | 1.35 | 0.86 | 0.63 | 1.12 |
| Pakistan | PAK | 8.34 | 1.59 | 0.5 | 7.25 |
| Papua New Guinea | PNG | 1.25 | 0.64 | 0.16 | 0.77 |
| Philippines | PHL | 5.51 | 1.19 | 0.95 | 5.27 |
| Samoa | WSM | 0.03 | 0 | 0.11 | 0.15 |
| Singapore | SGP | 0.17 | 0.13 | 1.16 | 1.19 |
| Srilanka | LKA | 0.87 | 0.45 | 0.25 | 0.67 |
| Tajikistan | TJK | 1.56 | 0.63 | 0.21 | 1.14 |
| Thailand | THA | 3.61 | 1.64 | 0.85 | 2.83 |
| Turkmenistan | TKM | 7.66 | 1.15 | 0.77 | 7.28 |
| Uzbekistan | UZB | 5.94 | 0.93 | 0.7 | 5.71 |
| Vanuatu | VUT | 0.08 | 0.01 | 0.14 | 0.2 |
| Viet Nam | VNM | 3.33 | 0.8 | 0.61 | 3.14 |
| Antigua and Barbuda | ATG | 0.47 | 0.18 | 0.26 | 0.55 |
| Argentina | ARG | 26.34 | 8.8 | 0.97 | 18.51 |
| Barbados | BRB | 0.02 | 0.01 | 0.38 | 0.39 |
| Belize | BLZ | 0.07 | 0.06 | 0.02 | 0.03 |
| Bolivia | BOL | 5.93 | 5.03 | 0.55 | 1.46 |
| Chile | CHL | 3.48 | 2.81 | 1.32 | 1.98 |
| Colombia | COL | 7.27 | 0.8 | 0.8 | 7.28 |
| Costa Rica | CRI | 0.67 | 0.41 | 0.17 | 0.43 |
| Cuba | CUB | 2.37 | 0.33 | 0.33 | 2.37 |
| Ecuador | ECU | 1.35 | 0.54 | 0.26 | 1.07 |
| El Salvador | SLV | 0.43 | 0.15 | 0.14 | 0.42 |
| Guatemala | GTM | 1.5 | 0.74 | 0.53 | 1.29 |
| Guyana | GUY | 0.11 | 0.01 | 0.12 | 0.21 |
| Haiti | HTI | 1.3 | 0.2 | 0.28 | 1.38 |
| Honduras | HND | 0.67 | 0.22 | 0.18 | 0.63 |
| Jamaica | JAM | 0.25 | 0.11 | 0.11 | 0.25 |
| Nicaragua | NIC | 0.96 | 0.64 | 0.18 | 0.5 |
| Panama | PAN | 0.45 | 0.12 | 0.18 | 0.51 |
| Paraguay | PRY | 2.32 | 0.66 | 0.13 | 1.79 |
| Peru | PER | 3.58 | 0.64 | 0.42 | 3.37 |
| Suriname | SUR | 0.07 | 0.01 | 0.08 | 0.14 |
| Trinidad and Tobago | TTO | 0.24 | 0.21 | 0.08 | 0.1 |
| Uruguay | URY | 1.33 | 0.64 | 0.16 | 0.84 |
| Venezuela | VEN | 2.54 | 0.05 | 0.76 | 3.26 |
| Albania | ALB | 0.37 | 0.09 | 0.06 | 0.34 |
| Belarus | BLR | 0.97 | 0.23 | 0.09 | 0.83 |
| Bosnia and Herzegovina | BIH | 1.52 | 0.11 | 0.28 | 1.69 |
| Iceland | ISL | 1.85 | 1.6 | 0.03 | 0.28 |
| Montenegro | YUG | 0.1 | 0.04 | 0.31 | 0.36 |
| Moldova | MDA | 0.68 | 0.45 | 0.01 | 0.24 |
| Serbia | SEB | 1.14 | 0.44 | 0.67 | 1.37 |
| The Former Yugoslav Republic of Macedonia | MKD | 1.05 | 0.1 | 0.2 | 1.14 |
| Ukraine | UKR | 6.88 | 2.95 | 0.32 | 4.25 |
| Algeria | DZA | 9.77 | 0.17 | 1.89 | 11.48 |
| Angola | AGO | 10.57 | 0.11 | 1.95 | 12.41 |
| Bahamas | BHS | 0.04 | 0 | 1.06 | 1.1 |
| Benin | BEN | 1.4 | 0.27 | 0.26 | 1.4 |
| Botswana | BWA | 0.66 | 0.11 | 0.25 | 0.8 |
| Burkina Faso | BFA | 2.87 | 0.47 | 0.42 | 2.83 |
| Burundi | BDI | 1.46 | 0.11 | 0.98 | 2.33 |
| Cameroon | CMR | 2.61 | 0.63 | 0.25 | 2.24 |
| Cape Verde | CPV | 0.05 | 0.01 | 0.85 | 0.89 |
| Central African Republic | CAF | 3.24 | 0.28 | 0.66 | 3.63 |
| Chad | TCD | 9.01 | 2.11 | 0.32 | 7.22 |
| Congo | COG | 1.72 | 0.08 | 1.14 | 2.79 |
| Cote d'Ivoire | CIV | 3.9 | 1.35 | 0.26 | 2.81 |
| The Democratic Republic of the Congo | COD | 9.62 | 0.32 | 1.97 | 11.27 |
| Djibouti | DJI | 0.52 | 0.16 | 0.74 | 1.1 |
| Dominican Republic | DOM | 0.64 | 0.11 | 0.34 | 0.86 |
| Eritrea | ERI | 1.53 | 0.12 | 0.62 | 2.04 |
| Ethiopia | ETH | 3.93 | 3.87 | 0.87 | 0.94 |
| Gabon | GAB | 1.42 | 0.07 | 0.98 | 2.33 |
| Gambia | GMB | 0.53 | 0.09 | 0.51 | 0.96 |
| Ghana | GHA | 3.02 | 1 | 0.43 | 2.45 |
| Guinea | GIN | 3.04 | 0.58 | 0.32 | 2.78 |
| Kenya | KEN | 6.04 | 0.53 | 1.44 | 6.96 |
| Lesotho | LSO | 0.19 | 0.02 | 0.58 | 0.75 |
| Liberia | LBR | 0.86 | 0.26 | 0.98 | 1.58 |
| Libya | LBY | 5.44 | 0.05 | 1.12 | 6.51 |
| Madagascar | MDG | 3.02 | 0.83 | 0.34 | 2.53 |
| Malawi | MWI | 1.88 | 1.04 | 0.26 | 1.1 |
| Mali | MLI | 8.57 | 0.58 | 0.83 | 8.83 |
| Mauritania | MRT | 4.03 | 0.31 | 1.34 | 5.06 |
| Mauritius | MUS | 0.03 | 0.03 | 0.14 | 0.15 |
| Morocco | MAR | 6.73 | 0.91 | 1.38 | 7.19 |
| Mozambique | MOZ | 1.71 | 0.5 | 0.29 | 1.5 |
| Namibia | NAM | 0.57 | 0.26 | 0.22 | 0.53 |
| Niger | NER | 11.76 | 0.42 | 1.15 | 12.49 |
| Nigeria | NGA | 20.23 | 0.91 | 1.4 | 20.72 |
| Rwanda | RWA | 0.49 | 0.04 | 0.29 | 0.73 |
| Sao Tome and Principe | STP | 0.03 | 0.01 | 0.68 | 0.7 |
| Senegal | SEN | 2.73 | 0.43 | 0.36 | 2.66 |
| Seychelles | SYC | 0.02 | 0.01 | 0.8 | 0.81 |
| Sierra Leone | SLE | 2.13 | 0.11 | 1.31 | 3.33 |
| Somalia | SOM | 10.66 | 0.28 | 0.52 | 10.9 |
| South Sudan | SSD | 13.91 | 0.87 | 0.57 | 13.61 |
| Sudan | SDN | 39.24 | 0.21 | 0.45 | 39.48 |
| Togo | TGO | 0.61 | 0.59 | 0.36 | 0.38 |
| Tunisia | TUN | 1.57 | 0.28 | 0.55 | 1.84 |
| Uganda | UGA | 1.69 | 0.77 | 0.19 | 1.11 |
| Tanzania | TZA | 11.15 | 3.21 | 0.47 | 8.41 |
| Zambia | ZMB | 2.48 | 1.51 | 0.18 | 1.15 |
| Zimbabwe | ZWE | 8.96 | 8.73 | 0.16 | 0.39 |
| Bahrain | BHR | 0.02 | 0 | 0.17 | 0.19 |
| Egypt | EGY | 3.29 | 0.79 | 2.44 | 4.94 |
| Iran | IRN | 4.91 | 0.71 | 3.76 | 7.96 |
| Iraq | IRQ | 0.92 | 0.02 | 0.97 | 1.87 |
| Israel | ISR | 0.26 | 0.13 | 1.26 | 1.39 |
| Jordan | JOR | 0.12 | 0.06 | 0.49 | 0.56 |
| Kuwait | KWT | 0.02 | 0.01 | 0.46 | 0.47 |
| Lebanon | LBN | 0.26 | 0.1 | 2.54 | 2.7 |
| Oman | OMN | 0.11 | 0.09 | 0.59 | 0.62 |
| Qatar | QAT | 0.03 | 0 | 0.31 | 0.34 |
| Saudi Arabia | SAU | 3.03 | 0.24 | 2.46 | 5.24 |
| Syrian Arab Republic | SYR | 1.43 | 0.46 | 1.7 | 2.68 |
| Former USSR | - | 5.01 | 1.55 | 0.27 | 3.73 |
| United Arab Emirates | ARE | 0.07 | 0.04 | 1.56 | 1.59 |
| Yemen | YEM | 1.73 | 0.08 | 0.97 | 2.62 |

**Supplementary Table 3. Potential regional species loss generated from FLW by country in 2018.**

| Description of countries and regions | ISO-alpha3 code | Mammal | Bird | Amphibian | Reptile | Total |
| --- | --- | --- | --- | --- | --- | --- |
| Austria | AUT | 105 | 449 | 51 | 38 | 643 |
| Belgium | BEL | 101 | 330 | 40 | 29 | 500 |
| Bulgaria | BGR | 585 | 3017 | 218 | 355 | 4176 |
| Cyprus | CYP | 110 | 9368 | 232 | 1882 | 11592 |
| Czech Republic | CZE | 113 | 353 | 38 | 29 | 532 |
| Germany | DEU | 468 | 1529 | 178 | 112 | 2286 |
| Denmark | DNK | 215 | 839 | 81 | 31 | 1166 |
| Estonia | EST | 19 | 91 | 7 | 3 | 119 |
| Spain | ESP | 520 | 2935 | 254 | 475 | 4185 |
| Finland | FIN | 5 | 63 | 2 | 1 | 71 |
| France | FRA | 690 | 2872 | 314 | 300 | 4175 |
| Greece | GRC | 373 | 1567 | 123 | 276 | 2340 |
| Croatia | HRV | 336 | 1419 | 131 | 169 | 2054 |
| Hungary | HUN | 255 | 792 | 76 | 59 | 1182 |
| Ireland | IRL | 458 | 1561 | 82 | 46 | 2147 |
| Italy | ITA | 1246 | 5369 | 594 | 638 | 7847 |
| Lithuania | LTU | 27 | 96 | 8 | 5 | 136 |
| Luxembourg | LUX | 24 | 72 | 9 | 7 | 113 |
| Latvia | LVA | 31 | 147 | 11 | 5 | 193 |
| Malta | MLT | 5 | 15 | 2 | 3 | 26 |
| Netherlands | NLD | 151 | 476 | 60 | 42 | 729 |
| Poland | POL | 376 | 1284 | 118 | 64 | 1842 |
| Portugal | PRT | 138 | 1328 | 83 | 126 | 1677 |
| Romania | ROM | 582 | 2112 | 185 | 179 | 3058 |
| Sweden | SWE | 27 | 200 | 10 | 4 | 242 |
| Slovenia | SVN | 138 | 625 | 56 | 67 | 886 |
| Slovakia | SVK | 140 | 519 | 48 | 35 | 742 |
| United Kingdom | GBR | 1301 | 4631 | 248 | 142 | 6322 |
| United States | USA | 2562 | 9103 | 103 | 3068 | 14835 |
| Japan | JPN | 522 | 7271 | 625 | 386 | 8804 |
| China | CHN | 8698 | 34200 | 2743 | 4558 | 50199 |
| Canada | CAN | 724 | 4045 | 218 | 108 | 5096 |
| Republic of Korea | KOR | 671 | 2230 | 323 | 350 | 3575 |
| Brazil | BRA | 2562 | 9281 | 1918 | 1357 | 15118 |
| India | IND | 5469 | 19981 | 984 | 2345 | 28779 |
| Mexico | MEX | 6604 | 15998 | 2257 | 6465 | 31324 |
| Russian Federation | RUS | 1405 | 7289 | 269 | 337 | 9300 |
| Australia | AUS | 1220 | 7231 | 616 | 2673 | 11739 |
| Switzerland | CHE | 38 | 169 | 22 | 14 | 244 |
| Turkey | TUR | 3030 | 9500 | 516 | 1902 | 14948 |
| Norway | NOR | 6 | 71 | 2 | 1 | 80 |
| Indonesia | IDN | 2498 | 13361 | 1161 | 3203 | 20222 |
| South Africa | ZAF | 2411 | 6966 | 799 | 1743 | 11919 |
| Afghanistan | AFG | 1494 | 1437 | 56 | 233 | 3221 |
| Armenia | ARM | 110 | 248 | 18 | 73 | 449 |
| Azerbaijan | AZE | 518 | 1269 | 74 | 326 | 2186 |
| Bangladesh | BGD | 1675 | 5618 | 148 | 658 | 8099 |
| Bhutan | BTN | 33 | 235 | 14 | 11 | 292 |
| Brunei | BRN | -6 | 31 | 4 | 7 | 35 |
| Cambodia | KHM | 390 | 1575 | 69 | 236 | 2270 |
| Democratic People's Republic of Korea | PRK | 67 | 886 | 46 | 45 | 1044 |
| Fiji | FJI | -41 | 601 | 16 | 99 | 675 |
| French Polynesia | PYF | 0 | 896 | 0 | 550 | 1446 |
| Georgia | GEO | 138 | 334 | 27 | 97 | 596 |
| Kazakhstan | KAZ | 1392 | 2177 | 64 | 283 | 3915 |
| Kyrgyzstan | KGZ | 694 | 1731 | 32 | 157 | 2614 |
| Laos | LAO | 146 | 1106 | 66 | 132 | 1450 |
| Malaysia | MYS | 778 | 3683 | 416 | 824 | 5700 |
| Maldives | MDV | 12 | 346 | 0 | 41 | 399 |
| Mongolia | MNG | 640 | 1173 | 24 | 30 | 1866 |
| Myanmar | MMR | 835 | 3494 | 137 | 365 | 4831 |
| Nepal | NPL | 613 | 2526 | 107 | 180 | 3426 |
| New Caledonia | NCL | 3 | 92 | 0 | 39 | 133 |
| New Zealand | NZL | 21 | 25094 | 9 | 127 | 25251 |
| Pakistan | PAK | 1617 | 3250 | 108 | 627 | 5601 |
| Papua New Guinea | PNG | -42 | 372 | 54 | 53 | 437 |
| Philippines | PHL | 768 | 8428 | 762 | 2396 | 12355 |
| Samoa | WSM | 9 | 169 | 0 | 41 | 219 |
| Singapore | SGP | 53 | 214 | 31 | 62 | 360 |
| Srilanka | LKA | 321 | 1701 | 256 | 401 | 2679 |
| Tajikistan | TJK | 397 | 710 | 17 | 105 | 1228 |
| Thailand | THA | 1817 | 6082 | 388 | 1087 | 9374 |
| Turkmenistan | TKM | 1183 | 1633 | 40 | 610 | 3467 |
| Uzbekistan | UZB | 768 | 1263 | 21 | 313 | 2366 |
| Vanuatu | VUT | -1 | 38 | 0 | 8 | 46 |
| Viet Nam | VNM | 1817 | 6671 | 336 | 933 | 9757 |
| Antigua and Barbuda | ATG | 620 | 6250 | 335 | 2325 | 9530 |
| Argentina | ARG | 1553 | 4169 | 534 | 1064 | 7320 |
| Barbados | BRB | 8 | 92 | 10 | 57 | 167 |
| Belize | BLZ | 40 | 208 | 19 | 50 | 317 |
| Bolivia | BOL | 483 | 1084 | 138 | 138 | 1844 |
| Chile | CHL | 294 | 889 | 163 | 111 | 1457 |
| Colombia | COL | 1945 | 4290 | 832 | 950 | 8017 |
| Costa Rica | CRI | 533 | 1732 | 314 | 498 | 3077 |
| Cuba | CUB | 389 | 3606 | 541 | 1919 | 6455 |
| Ecuador | ECU | 532 | 1239 | 351 | 359 | 2482 |
| El Salvador | SLV | 215 | 413 | 114 | 227 | 969 |
| Guatemala | GTM | 597 | 1434 | 334 | 704 | 3069 |
| Guyana | GUY | 6 | 30 | 4 | 5 | 45 |
| Haiti | HTI | 150 | 1906 | 343 | 1094 | 3493 |
| Honduras | HND | 203 | 567 | 117 | 225 | 1112 |
| Jamaica | JAM | 89 | 1113 | 110 | 227 | 1539 |
| Nicaragua | NIC | 205 | 725 | 111 | 205 | 1245 |
| Panama | PAN | 385 | 1037 | 197 | 316 | 1934 |
| Paraguay | PRY | 61 | 189 | 67 | 52 | 370 |
| Peru | PER | 325 | 1179 | 197 | 201 | 1902 |
| Suriname | SUR | 9 | 45 | 4 | 6 | 64 |
| Trinidad and Tobago | TTO | 280 | 3589 | 53 | 234 | 4155 |
| Uruguay | URY | 32 | 71 | 37 | 23 | 162 |
| Venezuela | VEN | 600 | 1360 | 135 | 111 | 2207 |
| Albania | ALB | 127 | 563 | 48 | 77 | 815 |
| Belarus | BLR | 65 | 194 | 18 | 11 | 288 |
| Bosnia and Herzegovina | BIH | 369 | 2039 | 202 | 258 | 2868 |
| Iceland | ISL | 1 | 20 | 0 | 0 | 21 |
| Montenegro | YUG | 15 | 103 | 12 | 15 | 145 |
| Moldova | MDA | 90 | 229 | 19 | 20 | 358 |
| Serbia | SEB | 318 | 1229 | 100 | 156 | 1802 |
| The Former Yugoslav Republic of Macedonia | MKD | 225 | 917 | 76 | 129 | 1347 |
| Ukraine | UKR | 916 | 2628 | 214 | 260 | 4019 |
| Algeria | DZA | 247 | 590 | 23 | 205 | 1065 |
| Angola | AGO | 252 | 874 | 94 | 175 | 1394 |
| Bahamas | BHS | 6 | 133 | 16 | 100 | 256 |
| Benin | BEN | 12 | 36 | 3 | 9 | 60 |
| Botswana | BWA | 18 | 44 | 3 | 11 | 76 |
| Burkina Faso | BFA | 11 | 22 | 1 | 8 | 42 |
| Burundi | BDI | 113 | 443 | 45 | 86 | 688 |
| Cameroon | CMR | 240 | 1497 | 208 | 180 | 2126 |
| Cape Verde | CPV | 4 | 78 | 3 | 22 | 108 |
| Central African Republic | CAF | 8 | 71 | 8 | 13 | 100 |
| Chad | TCD | 170 | 416 | 7 | 57 | 650 |
| Congo | COG | 18 | 166 | 16 | 29 | 229 |
| Cote d'Ivoire | CIV | 245 | 893 | 106 | 150 | 1395 |
| The Democratic Republic of the Congo | COD | 389 | 1232 | 109 | 251 | 1981 |
| Djibouti | DJI | 122 | 403 | 12 | 78 | 616 |
| Dominican Republic | DOM | 94 | 1225 | 204 | 683 | 2205 |
| Eritrea | ERI | 123 | 404 | 15 | 81 | 623 |
| Ethiopia | ETH | 159 | 544 | 40 | 93 | 837 |
| Gabon | GAB | 14 | 217 | 35 | 32 | 299 |
| Gambia | GMB | 9 | 38 | 1 | 3 | 50 |
| Ghana | GHA | 120 | 481 | 57 | 79 | 737 |
| Guinea | GIN | 237 | 726 | 52 | 105 | 1121 |
| Kenya | KEN | 579 | 1466 | 71 | 186 | 2301 |
| Lesotho | LSO | 44 | 120 | 13 | 20 | 197 |
| Liberia | LBR | 76 | 228 | 35 | 43 | 381 |
| Libya | LBY | 53 | 109 | 5 | 40 | 206 |
| Madagascar | MDG | 298 | 586 | 197 | 424 | 1506 |
| Malawi | MWI | 272 | 865 | 98 | 103 | 1338 |
| Mali | MLI | 85 | 220 | 8 | 45 | 357 |
| Mauritania | MRT | 47 | 87 | 5 | 31 | 171 |
| Mauritius | MUS | 4 | 73 | 1 | 21 | 99 |
| Morocco | MAR | 1050 | 3180 | 123 | 960 | 5314 |
| Mozambique | MOZ | 53 | 294 | 28 | 62 | 437 |
| Namibia | NAM | 41 | 94 | 6 | 35 | 176 |
| Niger | NER | 78 | 163 | 8 | 55 | 303 |
| Nigeria | NGA | 1608 | 7414 | 589 | 1346 | 10957 |
| Rwanda | RWA | 113 | 441 | 34 | 77 | 665 |
| Sao Tome and Principe | STP | 11 | 249 | 27 | 47 | 333 |
| Senegal | SEN | 13 | 41 | 2 | 9 | 65 |
| Seychelles | SYC | 60 | 663 | 95 | 444 | 1262 |
| Sierra Leone | SLE | 175 | 591 | 63 | 87 | 916 |
| Somalia | SOM | 663 | 1390 | 158 | 373 | 2584 |
| South Sudan | SSD | 142 | 358 | 14 | 65 | 578 |
| Sudan | SDN | 399 | 1009 | 41 | 187 | 1635 |
| Togo | TGO | 12 | 45 | 5 | 8 | 71 |
| Tunisia | TUN | 127 | 368 | 11 | 114 | 620 |
| Uganda | UGA | 130 | 457 | 31 | 84 | 703 |
| Tanzania | TZA | 700 | 2537 | 233 | 382 | 3853 |
| Zambia | ZMB | 64 | 245 | 18 | 33 | 360 |
| Zimbabwe | ZWE | 126 | 643 | 48 | 109 | 927 |
| Bahrain | BHR | 2 | 8 | 0 | 2 | 12 |
| Egypt | EGY | 74 | 214 | 13 | 86 | 387 |
| Iran | IRN | 1175 | 2150 | 101 | 927 | 4353 |
| Iraq | IRQ | 118 | 270 | 5 | 79 | 473 |
| Israel | ISR | 27 | 67 | 2 | 23 | 119 |
| Jordan | JOR | 13 | 27 | 0 | 8 | 49 |
| Kuwait | KWT | 2 | 9 | 0 | 3 | 14 |
| Lebanon | LBN | 56 | 166 | 9 | 53 | 283 |
| Oman | OMN | 6 | 17 | 0 | 7 | 29 |
| Qatar | QAT | 2 | 6 | 0 | 2 | 10 |
| Saudi Arabia | SAU | 83 | 187 | 2 | 65 | 337 |
| Syrian Arab Republic | SYR | 357 | 724 | 16 | 177 | 1275 |
| Former USSR | - | 159 | 821 | 29 | 34 | 1045 |
| United Arab Emirates | ARE | 2 | 7 | 0 | 3 | 12 |
| Yemen | YEM | 103 | 252 | 3 | 102 | 460 |

**Supplementary Table 4. Potential global species extinction generated from FLW by country in 2018.**

| Description of countries and regions | ISO-alpha3 code | Mammal | Bird | Amphibian | Reptile | Total |
| --- | --- | --- | --- | --- | --- | --- |
| Austria | AUT | 3 | 1 | 2 | 1 | 7 |
| Belgium | BEL | 2 | 1 | 1 | 0 | 5 |
| Bulgaria | BGR | 10 | 4 | 2 | 4 | 20 |
| Cyprus | CYP | 37 | 3 | 1 | 161 | 201 |
| Czech Republic | CZE | 2 | 2 | 1 | 0 | 5 |
| Germany | DEU | 8 | 5 | 5 | 1 | 19 |
| Denmark | DNK | 1 | 1 | 1 | 0 | 3 |
| Estonia | EST | 0 | 1 | 0 | 0 | 1 |
| Spain | ESP | 9 | 8 | 16 | 40 | 72 |
| Finland | FIN | 0 | 1 | 0 | 0 | 1 |
| France | FRA | 12 | 8 | 16 | 11 | 48 |
| Greece | GRC | 8 | 2 | 13 | 13 | 35 |
| Croatia | HRV | 4 | 2 | 6 | 6 | 18 |
| Hungary | HUN | 4 | 2 | 3 | 1 | 10 |
| Ireland | IRL | 1 | 3 | 0 | 0 | 4 |
| Italy | ITA | 17 | 5 | 44 | 15 | 82 |
| Lithuania | LTU | 1 | 1 | 0 | 0 | 2 |
| Luxembourg | LUX | 1 | 0 | 0 | 0 | 1 |
| Latvia | LVA | 1 | 1 | 0 | 0 | 2 |
| Malta | MLT | 0 | 0 | 1 | 0 | 1 |
| Netherlands | NLD | 3 | 2 | 2 | 1 | 7 |
| Poland | POL | 6 | 4 | 2 | 0 | 12 |
| Portugal | PRT | 8 | 13 | 4 | 7 | 31 |
| Romania | ROM | 11 | 6 | 4 | 2 | 23 |
| Sweden | SWE | 0 | 1 | 0 | 0 | 2 |
| Slovenia | SVN | 2 | 1 | 2 | 2 | 7 |
| Slovakia | SVK | 2 | 1 | 1 | 0 | 5 |
| United Kingdom | GBR | 2 | 7 | 1 | 0 | 11 |
| United States | USA | 62 | 24 | 2 | 114 | 202 |
| Japan | JPN | 22 | 27 | 68 | 3 | 119 |
| China | CHN | 206 | 231 | 451 | 91 | 979 |
| Canada | CAN | 6 | 20 | 4 | 1 | 31 |
| Republic of Korea | KOR | 6 | 12 | 50 | 2 | 71 |
| Brazil | BRA | 74 | 170 | 271 | 20 | 534 |
| India | IND | 101 | 202 | 355 | 228 | 885 |
| Mexico | MEX | 147 | 136 | 379 | 411 | 1072 |
| Russian Federation | RUS | 24 | 49 | 4 | 10 | 86 |
| Australia | AUS | 49 | 112 | 60 | 17 | 239 |
| Switzerland | CHE | 1 | 0 | 1 | 0 | 3 |
| Turkey | TUR | 56 | 15 | 47 | 121 | 239 |
| Norway | NOR | 0 | 0 | 0 | 0 | 0 |
| Indonesia | IDN | 144 | 316 | 205 | 124 | 789 |
| South Africa | ZAF | 61 | 61 | 83 | 25 | 230 |
| Afghanistan | AFG | 9 | 5 | 3 | 2 | 18 |
| Armenia | ARM | 6 | 1 | 1 | 9 | 17 |
| Azerbaijan | AZE | 17 | 3 | 5 | 23 | 47 |
| Bangladesh | BGD | 12 | 35 | 14 | 11 | 72 |
| Bhutan | BTN | 1 | 3 | 3 | 1 | 8 |
| Brunei | BRN | 0 | 1 | 0 | 0 | 1 |
| Cambodia | KHM | 5 | 8 | 13 | 11 | 37 |
| Democratic People's Republic of Korea | PRK | 1 | 3 | 4 | 0 | 8 |
| Fiji | FJI | -7 | 43 | 2 | 14 | 53 |
| French Polynesia | PYF | 0 | 90 | 0 | 0 | 90 |
| Georgia | GEO | 7 | 1 | 1 | 11 | 20 |
| Kazakhstan | KAZ | 18 | 9 | 1 | 1 | 29 |
| Kyrgyzstan | KGZ | 6 | 3 | 3 | 0 | 13 |
| Laos | LAO | 5 | 10 | 16 | 8 | 39 |
| Malaysia | MYS | 30 | 56 | 88 | 54 | 228 |
| Maldives | MDV | 0 | 0 | 0 | 0 | 0 |
| Mongolia | MNG | 5 | 3 | 0 | 0 | 8 |
| Myanmar | MMR | 14 | 28 | 30 | 26 | 97 |
| Nepal | NPL | 10 | 21 | 23 | 8 | 62 |
| New Caledonia | NCL | 0 | 7 | 0 | 14 | 22 |
| New Zealand | NZL | 2 | 482 | 4 | 4 | 491 |
| Pakistan | PAK | 20 | 18 | 10 | 10 | 58 |
| Papua New Guinea | PNG | -3 | 14 | 10 | 1 | 22 |
| Philippines | PHL | 90 | 326 | 181 | 275 | 872 |
| Samoa | WSM | 0 | 18 | 0 | 5 | 22 |
| Singapore | SGP | 4 | 4 | 8 | 5 | 21 |
| Srilanka | LKA | 19 | 33 | 150 | 27 | 229 |
| Tajikistan | TJK | 7 | 2 | 4 | 0 | 14 |
| Thailand | THA | 25 | 34 | 46 | 46 | 151 |
| Turkmenistan | TKM | 11 | 6 | 0 | 4 | 21 |
| Uzbekistan | UZB | 10 | 5 | 2 | 3 | 21 |
| Vanuatu | VUT | 0 | 3 | 0 | 1 | 3 |
| Viet Nam | VNM | 29 | 48 | 95 | 62 | 235 |
| Antigua and Barbuda | ATG | 13 | 30 | 26 | 7 | 76 |
| Argentina | ARG | 123 | 82 | 97 | 25 | 328 |
| Barbados | BRB | 0 | 1 | 1 | 0 | 2 |
| Belize | BLZ | 0 | 1 | 3 | 1 | 5 |
| Bolivia | BOL | 17 | 24 | 26 | 4 | 71 |
| Chile | CHL | 34 | 25 | 72 | 11 | 142 |
| Colombia | COL | 37 | 94 | 290 | 14 | 434 |
| Costa Rica | CRI | 7 | 28 | 82 | 2 | 119 |
| Cuba | CUB | 19 | 49 | 148 | 17 | 233 |
| Ecuador | ECU | 15 | 44 | 149 | 8 | 215 |
| El Salvador | SLV | 4 | 7 | 32 | 8 | 51 |
| Guatemala | GTM | 10 | 19 | 92 | 27 | 147 |
| Guyana | GUY | 0 | 1 | 1 | 0 | 1 |
| Haiti | HTI | 6 | 36 | 157 | 22 | 221 |
| Honduras | HND | 4 | 9 | 43 | 9 | 66 |
| Jamaica | JAM | 4 | 27 | 43 | 5 | 79 |
| Nicaragua | NIC | 2 | 10 | 29 | 3 | 44 |
| Panama | PAN | 3 | 16 | 38 | 1 | 59 |
| Paraguay | PRY | 4 | 5 | 6 | 1 | 16 |
| Peru | PER | 14 | 44 | 91 | 5 | 154 |
| Suriname | SUR | 0 | 0 | 0 | 0 | 1 |
| Trinidad and Tobago | TTO | 7 | 12 | 28 | 9 | 56 |
| Uruguay | URY | 2 | 2 | 2 | 0 | 7 |
| Venezuela | VEN | 7 | 13 | 49 | 2 | 71 |
| Albania | ALB | 1 | 0 | 2 | 2 | 6 |
| Belarus | BLR | 1 | 1 | 0 | 0 | 3 |
| Bosnia and Herzegovina | BIH | 5 | 2 | 6 | 9 | 22 |
| Iceland | ISL | 0 | 0 | 0 | 0 | 0 |
| Montenegro | YUG | 0 | 0 | 0 | 0 | 1 |
| Moldova | MDA | 2 | 2 | 0 | 0 | 4 |
| Serbia | SEB | 8 | 3 | 2 | 3 | 16 |
| The Former Yugoslav Republic of Macedonia | MKD | 5 | 1 | 2 | 3 | 11 |
| Ukraine | UKR | 18 | 12 | 4 | 6 | 40 |
| Algeria | DZA | 10 | 4 | 3 | 16 | 32 |
| Angola | AGO | 3 | 9 | 6 | 2 | 20 |
| Bahamas | BHS | 0 | 1 | 1 | 1 | 3 |
| Benin | BEN | 1 | 1 | 0 | 1 | 2 |
| Botswana | BWA | 0 | 1 | 0 | 0 | 1 |
| Burkina Faso | BFA | 1 | 1 | 0 | 1 | 2 |
| Burundi | BDI | 9 | 10 | 17 | 1 | 37 |
| Cameroon | CMR | 13 | 16 | 40 | 3 | 73 |
| Cape Verde | CPV | 0 | 1 | 0 | 6 | 7 |
| Central African Republic | CAF | 1 | 2 | 1 | 0 | 4 |
| Chad | TCD | 3 | 2 | 0 | 1 | 5 |
| Congo | COG | 0 | 3 | 1 | 0 | 5 |
| Cote d'Ivoire | CIV | 14 | 15 | 27 | 10 | 65 |
| The Democratic Republic of the Congo | COD | 20 | 22 | 25 | 3 | 70 |
| Djibouti | DJI | 2 | 1 | 0 | 1 | 4 |
| Dominican Republic | DOM | 3 | 22 | 93 | 12 | 130 |
| Eritrea | ERI | 3 | 3 | 1 | 1 | 7 |
| Ethiopia | ETH | 10 | 9 | 7 | 2 | 27 |
| Gabon | GAB | 1 | 4 | 5 | 0 | 9 |
| Gambia | GMB | 0 | 0 | 0 | 0 | 1 |
| Ghana | GHA | 6 | 7 | 12 | 6 | 31 |
| Guinea | GIN | 6 | 4 | 21 | 4 | 35 |
| Kenya | KEN | 16 | 16 | 12 | 2 | 46 |
| Lesotho | LSO | 0 | 1 | 1 | 0 | 2 |
| Liberia | LBR | 6 | 6 | 11 | 2 | 26 |
| Libya | LBY | 3 | 1 | 0 | 2 | 6 |
| Madagascar | MDG | 70 | 29 | 89 | 120 | 308 |
| Malawi | MWI | 4 | 4 | 11 | 0 | 19 |
| Mali | MLI | 3 | 2 | 0 | 2 | 6 |
| Mauritania | MRT | 2 | 1 | 0 | 1 | 4 |
| Mauritius | MUS | 1 | 10 | 0 | 0 | 12 |
| Morocco | MAR | 39 | 14 | 14 | 72 | 139 |
| Mozambique | MOZ | 1 | 2 | 1 | 0 | 4 |
| Namibia | NAM | 1 | 1 | 0 | 0 | 3 |
| Niger | NER | 3 | 2 | 0 | 2 | 8 |
| Nigeria | NGA | 37 | 36 | 59 | 37 | 170 |
| Rwanda | RWA | 8 | 8 | 14 | 1 | 31 |
| Sao Tome and Principe | STP | 3 | 23 | 4 | 2 | 33 |
| Senegal | SEN | 1 | 1 | 0 | 1 | 3 |
| Seychelles | SYC | 7 | 14 | 62 | 58 | 142 |
| Sierra Leone | SLE | 11 | 11 | 21 | 6 | 48 |
| Somalia | SOM | 18 | 25 | 6 | 5 | 54 |
| South Sudan | SSD | 5 | 4 | 1 | 1 | 10 |
| Sudan | SDN | 13 | 10 | 3 | 3 | 29 |
| Togo | TGO | 1 | 1 | 1 | 1 | 3 |
| Tunisia | TUN | 4 | 2 | 3 | 12 | 21 |
| Uganda | UGA | 7 | 7 | 11 | 1 | 26 |
| Tanzania | TZA | 18 | 34 | 70 | 8 | 129 |
| Zambia | ZMB | 1 | 2 | 1 | 0 | 4 |
| Zimbabwe | ZWE | 3 | 4 | 3 | 1 | 11 |
| Bahrain | BHR | 0 | 0 | 0 | 0 | 0 |
| Egypt | EGY | 2 | 1 | 0 | 1 | 4 |
| Iran | IRN | 31 | 6 | 20 | 65 | 122 |
| Iraq | IRQ | 2 | 1 | 1 | 4 | 7 |
| Israel | ISR | 1 | 0 | 1 | 2 | 3 |
| Jordan | JOR | 0 | 0 | 0 | 1 | 1 |
| Kuwait | KWT | 0 | 0 | 0 | 0 | 0 |
| Lebanon | LBN | 1 | 0 | 3 | 5 | 10 |
| Oman | OMN | 0 | 0 | 0 | 0 | 1 |
| Qatar | QAT | 0 | 0 | 0 | 0 | 0 |
| Saudi Arabia | SAU | 2 | 2 | 0 | 4 | 7 |
| Syrian Arab Republic | SYR | 7 | 1 | 3 | 12 | 23 |
| Former USSR | - | 3 | 6 | 0 | 1 | 10 |
| United Arab Emirates | ARE | 0 | 0 | 0 | 0 | 0 |
| Yemen | YEM | 1 | 4 | 1 | 13 | 19 |

**Supplementary Table 5. Total FLW production in FLW reduction scenarios.**

| Description of countries and regions | ISO-alpha3 code | Sall | Stop10 | Smeat | Shotspot |
| --- | --- | --- | --- | --- | --- |
| Austria | AUT | -1.24 | 1.17 | 2.87 | -1.49 |
| Belgium | BEL | 1.44 | -1.2 | 2.16 | -7.97 |
| Bulgaria | BGR | 2.93 | 4.07 | 4.69 | 3.35 |
| Cyprus | CYP | 2.12 | 2.21 | 2.24 | 2.07 |
| Czech Republic | CZE | 2.83 | 2.65 | 3.27 | 1.4 |
| Germany | DEU | -6.18 | 2.45 | 21.4 | -17.31 |
| Denmark | DNK | 4.81 | 0.25 | 4.37 | -3.31 |
| Estonia | EST | 1.03 | 0.95 | 1.16 | 0.94 |
| Spain | ESP | 3.58 | 5.17 | 15.2 | 31 |
| Finland | FIN | -0.89 | 0.56 | 1 | 0.21 |
| France | FRA | -20.41 | 8.18 | 19.85 | 24.34 |
| Greece | GRC | 1.04 | 4.05 | 4.76 | 5.13 |
| Croatia | HRV | 1.82 | 2.87 | 2.88 | 2.57 |
| Hungary | HUN | 2.13 | 3.37 | 3.81 | 2.24 |
| Ireland | IRL | 4.6 | -0.4 | 2.85 | -3.03 |
| Italy | ITA | 10.03 | 11.59 | 19.65 | 34.69 |
| Lithuania | LTU | -1.31 | 0.68 | 1.21 | 0.52 |
| Luxembourg | LUX | -0.21 | 0.44 | 0.42 | 0.12 |
| Latvia | LVA | 0.75 | 1.12 | 1.44 | 1.07 |
| Malta | MLT | 0.03 | 0.12 | 0.15 | 0.05 |
| Netherlands | NLD | 3.78 | -5.95 | 4.3 | -18.69 |
| Poland | POL | 7.95 | 11.78 | 13.45 | 7.4 |
| Portugal | PRT | 2.15 | 2.6 | 3.79 | 5.51 |
| Romania | ROM | 5.87 | 9.07 | 9.67 | 7.72 |
| Sweden | SWE | -0.32 | 0.99 | 2.25 | -0.53 |
| Slovenia | SVN | 2.23 | 2.34 | 2.34 | 2.07 |
| Slovakia | SVK | 0.7 | 1.74 | 1.77 | 1.35 |
| United Kingdom | GBR | -11.94 | 0.41 | 4.98 | -9.05 |
| United States | USA | 76.67 | 188.48 | 186.29 | 152.83 |
| Japan | JPN | -4.3 | -1.59 | 9.65 | 5.84 |
| China | CHN | -33.04 | 76.46 | 261.12 | 66.63 |
| Canada | CAN | 8.05 | -0.08 | 24.61 | -6.8 |
| Republic of Korea | KOR | 11.24 | 3.1 | 9.02 | 0.89 |
| Brazil | BRA | 107.58 | 155.2 | 161.38 | 145.17 |
| India | IND | 109.67 | 138.76 | 162.02 | 133.53 |
| Mexico | MEX | 38.05 | 52.18 | 54.86 | 48.25 |
| Russian Federation | RUS | 43.41 | 66.5 | 58.93 | 50.91 |
| Australia | AUS | -3.43 | 8.64 | 19.17 | 10.9 |
| Switzerland | CHE | -3.03 | -0.86 | 1.35 | -3.45 |
| Turkey | TUR | 38.55 | 54.6 | 51.65 | 52.78 |
| Norway | NOR | -1.48 | -1.29 | 0.64 | -2.32 |
| Indonesia | IDN | 35.76 | 52.68 | 56.31 | 47.34 |
| South Africa | ZAF | 3.86 | 9.32 | 11.21 | 9.74 |
| Afghanistan | AFG | 2.92 | 3.27 | 3.36 | 3.21 |
| Armenia | ARM | 0.87 | 1.07 | 1.23 | 1.15 |
| Azerbaijan | AZE | 3.11 | 4.22 | 4.47 | 4.47 |
| Bangladesh | BGD | 17.75 | 21.76 | 23.1 | 21.36 |
| Bhutan | BTN | 0.36 | 0.41 | 0.42 | 0.4 |
| Brunei | BRN | 0.37 | 0.37 | 0.38 | 0.36 |
| Cambodia | KHM | 6.3 | 6.52 | 6.68 | 6.57 |
| Democratic People's Republic of Korea | PRK | 2.2 | 2.51 | 2.8 | 2.41 |
| Fiji | FJI | 2.05 | 2.17 | 2.4 | 1.89 |
| French Polynesia | PYF | 0.04 | 0.05 | 0.05 | 0.04 |
| Georgia | GEO | 0.76 | 1.13 | 1.37 | 1.18 |
| Kazakhstan | KAZ | 7.46 | 8.92 | 9.85 | 9.81 |
| Kyrgyzstan | KGZ | 2.74 | 2.86 | 2.94 | 2.88 |
| Laos | LAO | 2.92 | 3.25 | 3.35 | 3.13 |
| Malaysia | MYS | 18.34 | 9.49 | 16.64 | 22.41 |
| Maldives | MDV | 0.01 | 0.01 | 0.01 | 0.01 |
| Mongolia | MNG | 0.27 | 0.35 | 0.4 | 0.37 |
| Myanmar | MMR | 8.76 | 9.8 | 10.33 | 9.56 |
| Nepal | NPL | 4.52 | 4.7 | 4.9 | 4.68 |
| New Caledonia | NCL | 0.04 | 0.04 | 0.04 | 0.03 |
| New Zealand | NZL | -5.4 | -4.56 | 3.08 | 1.23 |
| Pakistan | PAK | 35.72 | 44.15 | 43.83 | 43.31 |
| Papua New Guinea | PNG | 1.77 | 1.88 | 2.07 | 1.63 |
| Philippines | PHL | 13.87 | 18.51 | 21.37 | 18.16 |
| Samoa | WSM | 0.07 | 0.08 | 0.08 | 0.07 |
| Singapore | SGP | 2.37 | 2.43 | 4.12 | 3.83 |
| Srilanka | LKA | 1.86 | 2.92 | 3.78 | 3.09 |
| Tajikistan | TJK | 3.12 | 3.29 | 3.35 | 3.3 |
| Thailand | THA | 38.49 | 38.48 | 46.81 | 45.47 |
| Turkmenistan | TKM | 2.27 | 2.42 | 2.41 | 2.43 |
| Uzbekistan | UZB | 14.82 | 15.84 | 15.74 | 15.87 |
| Vanuatu | VUT | 0.1 | 0.11 | 0.12 | 0.1 |
| Viet Nam | VNM | 22.78 | 20.51 | 25.03 | 26.42 |
| Antigua and Barbuda | ATG | 6.55 | 6.76 | 6.98 | 6.64 |
| Argentina | ARG | 13.69 | 20.72 | 30.2 | 16.74 |
| Barbados | BRB | 0.06 | 0.06 | 0.06 | 0.06 |
| Belize | BLZ | 0.65 | 0.68 | 0.73 | 0.65 |
| Bolivia | BOL | 3.9 | 4.72 | 5.08 | 4.22 |
| Chile | CHL | -5.93 | -3.14 | 2.57 | -0.13 |
| Colombia | COL | 12.05 | 15.47 | 17.01 | 15.57 |
| Costa Rica | CRI | 2.61 | 3.69 | 4.75 | 3.06 |
| Cuba | CUB | 8.42 | 8.68 | 8.97 | 8.53 |
| Ecuador | ECU | 0.9 | 3.62 | 5.92 | 4.35 |
| El Salvador | SLV | 1.78 | 2.15 | 2.46 | 2.18 |
| Guatemala | GTM | 2.21 | 3.7 | 4.8 | 3.73 |
| Guyana | GUY | 0.06 | 0.2 | 0.32 | 0.09 |
| Haiti | HTI | 3.81 | 3.93 | 4.06 | 3.86 |
| Honduras | HND | 3.15 | 3.5 | 4.1 | 3.91 |
| Jamaica | JAM | 0.64 | 0.79 | 0.96 | 0.72 |
| Nicaragua | NIC | 1.23 | 1.48 | 1.78 | 1.77 |
| Panama | PAN | 0.27 | 0.97 | 1.23 | 0.91 |
| Paraguay | PRY | 2.12 | 3.39 | 4.15 | 3.13 |
| Peru | PER | 5.31 | 9.78 | 12.12 | 9.17 |
| Suriname | SUR | 0.04 | 0.12 | 0.19 | 0.05 |
| Trinidad and Tobago | TTO | 4.7 | 4.53 | 4.75 | 4.45 |
| Uruguay | URY | -1.15 | -0.71 | 1.19 | -1.04 |
| Venezuela | VEN | -1.11 | 3.52 | 3.84 | 3.07 |
| Albania | ALB | 1.85 | 1.98 | 1.98 | 1.9 |
| Belarus | BLR | 3.09 | 2.89 | 4.86 | 4.54 |
| Bosnia and Herzegovina | BIH | 2.2 | 2.59 | 2.76 | 2.45 |
| Iceland | ISL | -0.46 | 0.04 | 0.47 | -0.18 |
| Montenegro | YUG | 0.22 | 0.26 | 0.28 | 0.25 |
| Moldova | MDA | 1.88 | 2.05 | 2.25 | 2 |
| Serbia | SEB | 4.04 | 4.76 | 5.07 | 4.5 |
| The Former Yugoslav Republic of Macedonia | MKD | 1.6 | 1.88 | 2.01 | 1.78 |
| Ukraine | UKR | 22.88 | 25.33 | 28.76 | 24.31 |
| Algeria | DZA | 22.51 | 21.67 | 21.99 | 21.04 |
| Angola | AGO | 12.12 | 12.87 | 12.98 | 12.64 |
| Bahamas | BHS | 0.17 | 0.18 | 0.18 | 0.17 |
| Benin | BEN | 3.38 | 3.44 | 3.65 | 3.29 |
| Botswana | BWA | -0.01 | 0.17 | 0.12 | 0.03 |
| Burkina Faso | BFA | 2.38 | 2.55 | 2.59 | 2.47 |
| Burundi | BDI | 3.81 | 3.89 | 3.93 | 3.85 |
| Cameroon | CMR | 7.9 | 8.93 | 9.11 | 8.55 |
| Cape Verde | CPV | 0.16 | 0.16 | 0.17 | 0.16 |
| Central African Republic | CAF | 2.81 | 2.99 | 3.01 | 2.9 |
| Chad | TCD | 2.19 | 2.32 | 2.34 | 2.26 |
| Congo | COG | 1.98 | 2.11 | 2.13 | 2.05 |
| Cote d'Ivoire | CIV | 5.57 | 7.29 | 8.21 | 7.15 |
| The Democratic Republic of the Congo | COD | 25.82 | 27.42 | 27.65 | 26.93 |
| Djibouti | DJI | 0.13 | 0.13 | 0.13 | 0.13 |
| Dominican Republic | DOM | 3.41 | 4.4 | 5.08 | 4.09 |
| Eritrea | ERI | 0.39 | 0.4 | 0.4 | 0.4 |
| Ethiopia | ETH | 6.21 | 7.51 | 8.03 | 7.29 |
| Gabon | GAB | 1.09 | 1.16 | 1.17 | 1.13 |
| Gambia | GMB | 0.2 | 0.21 | 0.21 | 0.2 |
| Ghana | GHA | 10.27 | 11.73 | 12.58 | 11.15 |
| Guinea | GIN | 2.93 | 3.05 | 3.12 | 3.01 |
| Kenya | KEN | 3.95 | 7.04 | 7.61 | 6.69 |
| Lesotho | LSO | -0.2 | 0.04 | 0.1 | -0.14 |
| Liberia | LBR | 0.86 | 0.89 | 0.92 | 0.87 |
| Libya | LBY | 2.47 | 2.38 | 2.42 | 2.31 |
| Madagascar | MDG | 3.44 | 3.77 | 3.99 | 3.82 |
| Malawi | MWI | 6.88 | 7.2 | 7.33 | 7.1 |
| Mali | MLI | 6.3 | 6.54 | 6.74 | 6.39 |
| Mauritania | MRT | 0.68 | 0.71 | 0.73 | 0.69 |
| Mauritius | MUS | 0.19 | 0.28 | 0.39 | 0.03 |
| Morocco | MAR | 11.27 | 14.94 | 16.07 | 14.52 |
| Mozambique | MOZ | 3.89 | 4.23 | 4.47 | 4.05 |
| Namibia | NAM | -0.36 | 0.19 | 0.26 | -0.14 |
| Niger | NER | 6.46 | 6.71 | 6.91 | 6.56 |
| Nigeria | NGA | 57.79 | 60.68 | 62.31 | 62.65 |
| Rwanda | RWA | 3.36 | 3.53 | 3.58 | 3.51 |
| Sao Tome and Principe | STP | 0.08 | 0.09 | 0.09 | 0.09 |
| Senegal | SEN | 2.49 | 2.85 | 3.03 | 2.63 |
| Seychelles | SYC | 0.01 | 0.01 | 0.01 | 0.01 |
| Sierra Leone | SLE | 2.42 | 2.51 | 2.59 | 2.45 |
| Somalia | SOM | 2.77 | 2.83 | 2.86 | 2.8 |
| South Sudan | SSD | 5.01 | 5.12 | 5.17 | 5.07 |
| Sudan | SDN | 20.24 | 20.68 | 20.91 | 20.48 |
| Togo | TGO | 1.08 | 1.18 | 1.31 | 1.1 |
| Tunisia | TUN | 3.4 | 3.89 | 4.23 | 3.46 |
| Uganda | UGA | 4.14 | 4.89 | 5.1 | 4.71 |
| Tanzania | TZA | 8.95 | 10.13 | 10.75 | 9.77 |
| Zambia | ZMB | 2.22 | 2.79 | 2.89 | 2.6 |
| Zimbabwe | ZWE | 2.67 | 3.11 | 3.54 | 2.9 |
| Bahrain | BHR | 0.24 | -0.06 | 0.06 | -0.1 |
| Egypt | EGY | 29.9 | 34.56 | 36.9 | 33.92 |
| Iran | IRN | 33.99 | 38.34 | 39.14 | 38.74 |
| Iraq | IRQ | 1.78 | 2.22 | 2.76 | 2.03 |
| Israel | ISR | 0.51 | 1.12 | 2.34 | 0.7 |
| Jordan | JOR | -0.29 | 0.76 | 0.95 | 0.62 |
| Kuwait | KWT | 0.58 | 0.03 | 0.16 | -0.01 |
| Lebanon | LBN | 1.02 | 1.27 | 1.58 | 1.16 |
| Oman | OMN | 1.2 | 0.48 | 0.74 | 0.4 |
| Qatar | QAT | 0.08 | -0.06 | 0.04 | -0.11 |
| Saudi Arabia | SAU | 1.08 | 1.16 | 2.87 | 0.53 |
| Syrian Arab Republic | SYR | 2.11 | 2.63 | 3.27 | 2.4 |
| Former USSR | - | 12.2 | 13.04 | 12.96 | 13.07 |
| United Arab Emirates | ARE | -0.32 | -1.72 | 0.62 | -2.16 |
| Yemen | YEM | 1.24 | 1.55 | 1.93 | 1.41 |

*Notes: Total FLW production denotes FLW generated from domestic production (of domestically produced and exported food).*

**Supplementary Table 6. Total land footprint production in FLW reduction scenarios.**

| Description of countries and regions | ISO-alpha3 code | Sall | Stop10 | Smeat | Shotspot |
| --- | --- | --- | --- | --- | --- |
| Austria | AUT | -0.23 | 0.22 | 0.52 | -0.28 |
| Belgium | BEL | 0.24 | -0.2 | 0.15 | -1.34 |
| Bulgaria | BGR | 0.81 | 1.12 | 1.23 | 0.92 |
| Cyprus | CYP | 1.61 | 1.68 | 1.76 | 1.58 |
| Czech Republic | CZE | 0.62 | 0.58 | 0.72 | 0.3 |
| Germany | DEU | -1.07 | 0.43 | 3.76 | -3.01 |
| Denmark | DNK | 0.55 | 0.03 | 0.35 | -0.38 |
| Estonia | EST | 0.42 | 0.38 | 0.48 | 0.38 |
| Spain | ESP | 0.71 | 1.03 | 2.24 | 6.15 |
| Finland | FIN | -0.29 | 0.19 | 0.43 | 0.07 |
| France | FRA | -3.27 | 1.31 | 2.16 | 3.9 |
| Greece | GRC | 0.26 | 1.03 | 1.09 | 1.3 |
| Croatia | HRV | 0.59 | 0.94 | 0.91 | 0.84 |
| Hungary | HUN | 0.54 | 0.85 | 0.88 | 0.57 |
| Ireland | IRL | 2.81 | -0.25 | 1.74 | -1.85 |
| Italy | ITA | 1.64 | 1.9 | 2.84 | 5.67 |
| Lithuania | LTU | -0.3 | 0.16 | 0.31 | 0.12 |
| Luxembourg | LUX | -0.08 | 0.18 | 0.18 | 0.05 |
| Latvia | LVA | 0.33 | 0.49 | 0.66 | 0.47 |
| Malta | MLT | 0.01 | 0.02 | 0.03 | 0.01 |
| Netherlands | NLD | 0.72 | -1.14 | 0.74 | -3.57 |
| Poland | POL | 1 | 1.48 | 1.47 | 0.93 |
| Portugal | PRT | 0.63 | 0.76 | 0.99 | 1.61 |
| Romania | ROM | 1.47 | 2.27 | 2.24 | 1.93 |
| Sweden | SWE | -0.11 | 0.33 | 0.81 | -0.18 |
| Slovenia | SVN | 0.37 | 0.39 | 0.39 | 0.34 |
| Slovakia | SVK | 0.19 | 0.47 | 0.49 | 0.36 |
| United Kingdom | GBR | -5.32 | 0.18 | 0.63 | -4.03 |
| United States | USA | 31.87 | 78.35 | 71.44 | 63.53 |
| Japan | JPN | -0.78 | -0.29 | 1.55 | 1.06 |
| China | CHN | -5.09 | 11.54 | -11.82 | 10.05 |
| Canada | CAN | 4.56 | -0.05 | 13.33 | -3.85 |
| Republic of Korea | KOR | 1.54 | 0.42 | 1.01 | 0.12 |
| Brazil | BRA | 26.49 | 38.22 | 30.78 | 35.74 |
| India | IND | 15.07 | 19.06 | 22.16 | 18.35 |
| Mexico | MEX | 12.96 | 17.78 | 11.63 | 16.44 |
| Russian Federation | RUS | 26.44 | 40.51 | 30.37 | 31.01 |
| Australia | AUS | -4.19 | 10.55 | 7.12 | 13.31 |
| Switzerland | CHE | -0.59 | -0.17 | 0.26 | -0.67 |
| Turkey | TUR | 5.41 | 7.67 | 6.22 | 7.41 |
| Norway | NOR | -0.35 | -0.3 | 0.15 | -0.55 |
| Indonesia | IDN | 7.48 | 11.01 | 11.79 | 9.9 |
| South Africa | ZAF | 5.88 | 14.17 | 12.24 | 14.82 |
| Afghanistan | AFG | 3.68 | 4.13 | 3.73 | 4.04 |
| Armenia | ARM | 0.28 | 0.35 | 0.31 | 0.37 |
| Azerbaijan | AZE | 0.92 | 1.24 | 0.9 | 1.32 |
| Bangladesh | BGD | 3.22 | 3.95 | 4.16 | 3.88 |
| Bhutan | BTN | 0.13 | 0.14 | 0.13 | 0.14 |
| Brunei | BRN | 0.12 | 0.13 | 0.13 | 0.12 |
| Cambodia | KHM | 1.22 | 1.27 | 0.49 | 1.28 |
| Democratic People's Republic of Korea | PRK | 0.41 | 0.47 | 0.43 | 0.45 |
| Fiji | FJI | 1.2 | 1.27 | 1.38 | 1.1 |
| French Polynesia | PYF | 0.05 | 0.05 | 0.05 | 0.04 |
| Georgia | GEO | 0.24 | 0.35 | 0.3 | 0.37 |
| Kazakhstan | KAZ | 8.88 | 10.63 | 9.77 | 11.68 |
| Kyrgyzstan | KGZ | 1.74 | 1.81 | 1.6 | 1.83 |
| Laos | LAO | 0.94 | 1.04 | -0.48 | 1 |
| Malaysia | MYS | 3.34 | 1.73 | 2.65 | 4.08 |
| Maldives | MDV | 0.01 | 0.01 | 0.01 | 0.01 |
| Mongolia | MNG | 2.13 | 2.73 | 2.9 | 2.87 |
| Myanmar | MMR | 1.61 | 1.8 | 1.77 | 1.76 |
| Nepal | NPL | 1.19 | 1.24 | 1.25 | 1.23 |
| New Caledonia | NCL | 0.14 | 0.15 | 0.15 | 0.13 |
| New Zealand | NZL | -1.85 | -1.56 | 0.95 | 0.42 |
| Pakistan | PAK | 6.4 | 7.92 | 7.65 | 7.77 |
| Papua New Guinea | PNG | 1.03 | 1.1 | 0.4 | 0.95 |
| Philippines | PHL | 3.34 | 4.45 | 0.77 | 4.37 |
| Samoa | WSM | 0.03 | 0.03 | 0.02 | 0.03 |
| Singapore | SGP | 0.09 | 0.09 | -0.22 | 0.14 |
| Srilanka | LKA | 0.42 | 0.66 | 0.82 | 0.69 |
| Tajikistan | TJK | 1.43 | 1.5 | 1.39 | 1.51 |
| Thailand | THA | 2.91 | 2.91 | 3.27 | 3.44 |
| Turkmenistan | TKM | 7.03 | 7.51 | 7.13 | 7.53 |
| Uzbekistan | UZB | 5.45 | 5.82 | 3.75 | 5.84 |
| Vanuatu | VUT | 0.06 | 0.07 | 0.04 | 0.06 |
| Viet Nam | VNM | 2.98 | 2.68 | 3.13 | 3.46 |
| Antigua and Barbuda | ATG | 0.43 | 0.44 | 0.4 | 0.44 |
| Argentina | ARG | 11.24 | 17.01 | 17.25 | 13.74 |
| Barbados | BRB | 0.02 | 0.02 | 0.02 | 0.02 |
| Belize | BLZ | 0.06 | 0.06 | 0.04 | 0.06 |
| Bolivia | BOL | 4.4 | 5.33 | 3.43 | 4.77 |
| Chile | CHL | -6.3 | -3.34 | 1.16 | -0.14 |
| Colombia | COL | 4.8 | 6.16 | 3.79 | 6.2 |
| Costa Rica | CRI | 0.36 | 0.5 | 0.56 | 0.42 |
| Cuba | CUB | 2.18 | 2.25 | 1.95 | 2.21 |
| Ecuador | ECU | 0.2 | 0.79 | 1.1 | 0.95 |
| El Salvador | SLV | 0.3 | 0.36 | 0.34 | 0.37 |
| Guatemala | GTM | 0.64 | 1.07 | 0.83 | 1.07 |
| Guyana | GUY | 0.02 | 0.06 | -0.04 | 0.03 |
| Haiti | HTI | 1.2 | 1.23 | 1.01 | 1.21 |
| Honduras | HND | 0.5 | 0.55 | 0.51 | 0.62 |
| Jamaica | JAM | 0.16 | 0.2 | 0.15 | 0.18 |
| Nicaragua | NIC | 0.59 | 0.71 | 0.5 | 0.85 |
| Panama | PAN | 0.08 | 0.3 | -0.07 | 0.28 |
| Paraguay | PRY | 1.05 | 1.67 | -1.63 | 1.54 |
| Peru | PER | 1.46 | 2.69 | 1.01 | 2.53 |
| Suriname | SUR | 0.01 | 0.04 | 0.04 | 0.02 |
| Trinidad and Tobago | TTO | 0.23 | 0.23 | 0.23 | 0.22 |
| Uruguay | URY | -1.07 | -0.66 | 0.8 | -0.97 |
| Venezuela | VEN | -0.53 | 1.68 | -1.32 | 1.46 |
| Albania | ALB | 0.33 | 0.35 | 0.34 | 0.34 |
| Belarus | BLR | 0.51 | 0.47 | 0.67 | 0.74 |
| Bosnia and Herzegovina | BIH | 1.18 | 1.39 | 1.41 | 1.31 |
| Iceland | ISL | -1.64 | 0.15 | 1.64 | -0.64 |
| Montenegro | YUG | 0.07 | 0.09 | 0.09 | 0.08 |
| Moldova | MDA | 0.55 | 0.6 | 0.65 | 0.58 |
| Serbia | SEB | 0.88 | 1.04 | 1.08 | 0.98 |
| The Former Yugoslav Republic of Macedonia | MKD | 0.81 | 0.95 | 0.95 | 0.9 |
| Ukraine | UKR | 5.28 | 5.84 | 6.25 | 5.61 |
| Algeria | DZA | 9.77 | 9.4 | 7.94 | 9.13 |
| Angola | AGO | 9.75 | 10.36 | 8.23 | 10.17 |
| Bahamas | BHS | 0.04 | 0.04 | 0.03 | 0.04 |
| Benin | BEN | 1.29 | 1.32 | 1.36 | 1.26 |
| Botswana | BWA | -0.05 | 0.53 | 0.15 | 0.11 |
| Burkina Faso | BFA | 2.59 | 2.78 | 2.56 | 2.69 |
| Burundi | BDI | 1.39 | 1.42 | 1.14 | 1.41 |
| Cameroon | CMR | 2.24 | 2.53 | 2.38 | 2.43 |
| Cape Verde | CPV | 0.04 | 0.05 | 0.05 | 0.05 |
| Central African Republic | CAF | 2.98 | 3.16 | 2.76 | 3.08 |
| Chad | TCD | 8.27 | 8.79 | 8.46 | 8.55 |
| Congo | COG | 1.58 | 1.68 | 0.9 | 1.64 |
| Cote d'Ivoire | CIV | 2.63 | 3.44 | 3.17 | 3.37 |
| The Democratic Republic of the Congo | COD | 8.88 | 9.43 | 2.91 | 9.26 |
| Djibouti | DJI | 0.5 | 0.51 | 0.51 | 0.5 |
| Dominican Republic | DOM | 0.41 | 0.52 | 0.51 | 0.49 |
| Eritrea | ERI | 1.46 | 1.49 | 1.48 | 1.47 |
| Ethiopia | ETH | 2.99 | 3.62 | 3.71 | 3.52 |
| Gabon | GAB | 1.31 | 1.39 | 1.23 | 1.35 |
| Gambia | GMB | 0.49 | 0.51 | 0.53 | 0.5 |
| Ghana | GHA | 2.44 | 2.79 | 1.95 | 2.65 |
| Guinea | GIN | 2.83 | 2.95 | 2.85 | 2.91 |
| Kenya | KEN | 3.03 | 5.4 | 5.4 | 5.13 |
| Lesotho | LSO | -0.32 | 0.06 | 0.08 | -0.22 |
| Liberia | LBR | 0.8 | 0.83 | 0.73 | 0.81 |
| Libya | LBY | 5.44 | 5.24 | 4.81 | 5.09 |
| Madagascar | MDG | 2.6 | 2.84 | 2.9 | 2.88 |
| Malawi | MWI | 1.76 | 1.84 | 1.77 | 1.81 |
| Mali | MLI | 7.96 | 8.26 | 8.27 | 8.08 |
| Mauritania | MRT | 3.74 | 3.88 | 3.98 | 3.79 |
| Mauritius | MUS | 0.01 | 0.02 | 0 | 0 |
| Morocco | MAR | 4.6 | 6.09 | 5.58 | 5.92 |
| Mozambique | MOZ | 1.48 | 1.61 | 1.48 | 1.54 |
| Namibia | NAM | -0.59 | 0.31 | -0.19 | -0.23 |
| Niger | NER | 10.91 | 11.33 | 11.44 | 11.07 |
| Nigeria | NGA | 18.1 | 19.01 | 4.52 | 19.63 |
| Rwanda | RWA | 0.45 | 0.48 | 0.47 | 0.47 |
| Sao Tome and Principe | STP | 0.03 | 0.03 | 0.01 | 0.03 |
| Senegal | SEN | 2.19 | 2.5 | 2.14 | 2.31 |
| Seychelles | SYC | 0.02 | 0.02 | 0.02 | 0.02 |
| Sierra Leone | SLE | 1.97 | 2.05 | 1.96 | 2 |
| Somalia | SOM | 10.16 | 10.38 | 10.45 | 10.28 |
| South Sudan | SSD | 13.25 | 13.54 | 13.55 | 13.41 |
| Sudan | SDN | 37.39 | 38.2 | 37.15 | 37.83 |
| Togo | TGO | 0.49 | 0.54 | 0.49 | 0.5 |
| Tunisia | TUN | 1.22 | 1.4 | 1.4 | 1.24 |
| Uganda | UGA | 1.35 | 1.59 | 1.58 | 1.53 |
| Tanzania | TZA | 9.17 | 10.38 | 10.44 | 10.01 |
| Zambia | ZMB | 1.83 | 2.3 | 1.23 | 2.15 |
| Zimbabwe | ZWE | 6.65 | 7.73 | 8.09 | 7.22 |
| Bahrain | BHR | 0.09 | -0.02 | 0.03 | -0.04 |
| Egypt | EGY | 2.62 | 3.03 | 3.06 | 2.97 |
| Iran | IRN | 3.98 | 4.49 | 3.99 | 4.53 |
| Iraq | IRQ | 0.5 | 0.63 | 0.44 | 0.57 |
| Israel | ISR | 0.05 | 0.11 | 0.19 | 0.07 |
| Jordan | JOR | -0.03 | 0.07 | 0.02 | 0.06 |
| Kuwait | KWT | 0.07 | 0 | 0.02 | 0 |
| Lebanon | LBN | 0.14 | 0.18 | 0.16 | 0.16 |
| Oman | OMN | 0.19 | 0.08 | 0.14 | 0.06 |
| Qatar | QAT | 0.03 | -0.02 | -0.01 | -0.04 |
| Saudi Arabia | SAU | 1.07 | 1.16 | 2.07 | 0.53 |
| Syrian Arab Republic | SYR | 0.78 | 0.98 | 0.78 | 0.89 |
| Former USSR | - | 4.6 | 4.92 | 4.38 | 4.93 |
| United Arab Emirates | ARE | -0.07 | -0.36 | 0.18 | -0.46 |
| Yemen | YEM | 0.95 | 1.18 | 0.66 | 1.08 |

*Notes: Total land footprint production denotes land footprint generated from domestic production (of domestically produced and exported food).*

**Supplementary Table 7. Remaining resources loss in FLW reduction scenarios.**

|  | Sall | Stop10 | Smeat | Shotspot |
| --- | --- | --- | --- | --- |
| FLW (Mt) | 1125.4 | 1640.2 | 2090.1 | 1568.1 |
| Land footprint (Mha) | 445.3 | 624.9 | 554.5 | 586.0 |
| Regional species loss (species*years) | 215500 | 354665 | 421099 | 352682 |
| Mammal | 35720 | 59247 | 66802 | 57400 |
| Bird | 145929 | 234009 | 280112 | 232951 |
| Amphibian | 9376 | 17003 | 20659 | 17425 |
| Reptile | 24475 | 44406 | 53527 | 44906 |
| Global species extinction (species*years) | 5549 | 9300 | 10990 | 9592 |
| Mammal | 869 | 1502 | 1786 | 1518 |
| Bird | 1864 | 2714 | 2887 | 2699 |
| Amphibian | 1621 | 3086 | 3889 | 3302 |
| Reptile | 1196 | 1999 | 2429 | 2073 |

# Reference

1 *FAOSTAT* (Food and Agriculture Organization of the United Nations, 2020).

2 *Food Loss and Waste Database* (FAO, 2022); <https://www.fao.org/platform-food-loss-waste/flw-data/en/>.

3 Bruckner, M. *et al.* FABIO—The Construction of the Food and Agriculture Biomass Input–Output Model. *Environ. Sci. Technol.* **53**, 11302-11312 (2019).

4 Cabernard, L. & Pfister, S. A highly resolved MRIO database for analyzing environmental footprints and Green Economy Progress. *Sci. Total Environ.* **755**, 142587 (2021).

5 Chaudhary, A., Verones, F., de Baan, L. & Hellweg, S. Quantifying Land Use Impacts on Biodiversity: Combining Species–Area Models and Vulnerability Indicators. *Environ. Sci. Technol.* **49**, 9987-9995 (2015).

6 *GTAP v.10 Data Base* (Purdue University, 2019); <https://www.gtap.agecon.purdue.edu/about/project.asp>.

7 *UN M49* (United Nations Statistics Division, 1999).
