# Supplementary material for: Cascading impacts of food loss and waste on biodiversity through agricultural land use
Source: Research Square preprint supplement (doi:10.21203/rs.3.rs-5048002/v1), 2024-09-30
Supplement: Supplementary file 2 [file d6925c14736674134c6e3137.xlsx]

## Sheet: ST1_FLW flows
Description of countries and regions	ISO-alpha3 code	FLW generated from domestic production (of domestically produced and exported food)	Export-embedded FLW	Import-embedded FLW	FLW generated from domestic consumption (of domestically produced and imported food)
Austria	AUT	3.44	1.38	1.61	3.67
Belgium	BEL	4.17	2.42	3.68	5.42
Bulgaria	BGR	4.93	2.45	0.93	3.4
Cyprus	CYP	2.33	1.44	0.16	1.04
Czech Republic	CZE	3.72	0.96	1.59	4.35
Germany	DEU	20.35	5.79	17.43	31.99
Denmark	DNK	5.5	2.48	0.86	3.88
Estonia	EST	1.28	0.77	0.11	0.62
Spain	ESP	17.43	7.31	7.12	17.24
Finland	FIN	1.68	0.2	0.65	2.13
France	FRA	26.27	11.18	10.8	25.89
Greece	GRC	5.33	1.44	1.78	5.67
Croatia	HRV	3.12	1.04	0.5	2.58
Hungary	HUN	4.38	2.37	0.64	2.65
Ireland	IRL	2.89	1.77	1.08	2.2
Italy	ITA	22.17	2.8	13.81	33.18
Lithuania	LTU	1.78	0.9	0.29	1.17
Luxembourg	LUX	0.64	0.55	0.2	0.28
Latvia	LVA	1.56	1.06	0.21	0.71
Malta	MLT	0.19	0.15	0.06	0.09
Netherlands	NLD	5.66	3.83	5.01	6.85
Poland	POL	16.75	4.06	3.05	15.73
Portugal	PRT	4.29	0.86	2.57	6
Romania	ROM	10.39	3.84	1.7	8.24
Sweden	SWE	2.73	0.58	2.56	4.71
Slovenia	SVN	2.51	0.95	0.46	2.02
Slovakia	SVK	2.02	0.72	0.78	2.08
United Kingdom	GBR	9.65	1.86	9.12	16.91
United States	USA	203.39	37.87	68.44	233.95
Japan	JPN	12.53	0.13	18.04	30.44
China	CHN	296.89	6.85	57.17	347.21
Canada	CAN	27.67	12.96	13.71	28.42
Republic of Korea	KOR	10.63	0.09	16.11	26.65
Brazil	BRA	168.99	32.71	6.84	143.11
India	IND	165.06	20.89	12.23	156.4
Mexico	MEX	58.71	21.95	7.43	44.18
Russian Federation	RUS	65.6	15.95	17.12	66.77
Australia	AUS	23.84	9.86	3.67	17.65
Switzerland	CHE	1.84	0.37	0.98	2.44
Turkey	TUR	55.36	4.4	7.91	58.87
Norway	NOR	0.86	0.06	1.5	2.3
Indonesia	IDN	57.44	11.04	6.95	53.35
South Africa	ZAF	12.25	3.43	1.47	10.29
Afghanistan	AFG	3.45	0.4	0.24	3.3
Armenia	ARM	1.34	0.2	0.37	1.51
Azerbaijan	AZE	4.88	1.05	1.07	4.9
Bangladesh	BGD	23.47	3.03	1.11	21.55
Bhutan	BTN	0.43	0.15	0.44	0.72
Brunei	BRN	0.38	0.31	0.05	0.11
Cambodia	KHM	6.78	3.38	0.18	3.58
Democratic People's Republic of Korea	PRK	2.96	1.34	0.16	1.79
Fiji	FJI	2.47	1.82	0.22	0.86
French Polynesia	PYF	0.05	0	0.31	0.36
Georgia	GEO	1.48	0.43	0.91	1.96
Kazakhstan	KAZ	10.25	1.79	4.11	12.57
Kyrgyzstan	KGZ	3.03	0.54	1.01	3.51
Laos	LAO	3.45	2.47	0.08	1.06
Malaysia	MYS	17.06	14.87	5.94	8.13
Maldives	MDV	0.01	0	0.26	0.27
Mongolia	MNG	0.45	0.15	0.25	0.55
Myanmar	MMR	10.77	3.18	0.04	7.62
Nepal	NPL	4.96	1.84	0.23	3.35
New Caledonia	NCL	0.04	0	0.26	0.3
New Zealand	NZL	3.94	3.08	2.54	3.4
Pakistan	PAK	46.5	13.13	1.81	35.18
Papua New Guinea	PNG	2.13	1.64	0.39	0.88
Philippines	PHL	22.9	7.8	3.32	18.42
Samoa	WSM	0.09	0	0.14	0.22
Singapore	SGP	4.46	3.71	3.01	3.76
Srilanka	LKA	3.87	2.16	1.16	2.87
Tajikistan	TJK	3.42	2.42	0.48	1.48
Thailand	THA	47.74	31.32	2.48	18.89
Turkmenistan	TKM	2.47	0.85	2.15	3.77
Uzbekistan	UZB	16.15	3.89	1.57	13.83
Vanuatu	VUT	0.13	0.02	0.18	0.28
Viet Nam	VNM	25.43	9.21	1.51	17.73
Antigua and Barbuda	ATG	7.13	2.55	0.17	4.75
Argentina	ARG	32.09	14.89	3.27	20.47
Barbados	BRB	0.06	0.04	0.69	0.71
Belize	BLZ	0.75	0.61	0.06	0.2
Bolivia	BOL	5.25	3.55	0.72	2.42
Chile	CHL	3.28	1.59	2.1	3.79
Colombia	COL	18.27	2.65	2.62	18.24
Costa Rica	CRI	4.92	3.51	0.44	1.85
Cuba	CUB	9.16	1.19	0.65	8.61
Ecuador	ECU	6.2	2.93	0.72	3.98
El Salvador	SLV	2.58	1.03	0.37	1.92
Guatemala	GTM	5.2	2.48	1.13	3.84
Guyana	GUY	0.34	0.04	0.46	0.75
Haiti	HTI	4.15	0.81	0.34	3.68
Honduras	HND	4.24	1.65	0.62	3.22
Jamaica	JAM	1.02	0.49	0.52	1.05
Nicaragua	NIC	2.01	1.13	0.36	1.23
Panama	PAN	1.44	0.52	0.45	1.37
Paraguay	PRY	4.7	1.51	0.38	3.57
Peru	PER	13	2.2	1.27	12.08
Suriname	SUR	0.21	0.04	0.35	0.52
Trinidad and Tobago	TTO	4.77	4.44	0.15	0.48
Uruguay	URY	1.42	0.68	0.72	1.45
Venezuela	VEN	5.34	0.12	2.26	7.48
Albania	ALB	2.06	0.57	0.23	1.73
Belarus	BLR	5.89	2.34	0.35	3.9
Bosnia and Herzegovina	BIH	2.84	0.34	1.06	3.56
Iceland	ISL	0.52	0.44	0.05	0.14
Montenegro	YUG	0.29	0.03	0.96	1.22
Moldova	MDA	2.33	1.38	0.03	0.98
Serbia	SEB	5.22	2.27	2.55	5.5
The Former Yugoslav Republic of Macedonia	MKD	2.07	0.28	0.72	2.5
Ukraine	UKR	29.82	9.79	1.25	21.28
Algeria	DZA	22.5	0.23	6.88	29.16
Angola	AGO	13.13	0.13	3.22	16.23
Bahamas	BHS	0.19	0.02	1.18	1.35
Benin	BEN	3.66	0.7	0.32	3.29
Botswana	BWA	0.2	0.01	0.35	0.54
Burkina Faso	BFA	2.64	0.28	0.6	2.95
Burundi	BDI	3.99	0.37	0.89	4.51
Cameroon	CMR	9.2	2.44	0.48	7.24
Cape Verde	CPV	0.17	0.02	0.96	1.1
Central African Republic	CAF	3.06	0.3	0.67	3.44
Chad	TCD	2.38	0.65	0.43	2.16
Congo	COG	2.16	0.16	1.3	3.31
Cote d'Ivoire	CIV	8.26	4.13	0.51	4.64
The Democratic Republic of the Congo	COD	27.98	1.35	2.39	29.03
Djibouti	DJI	0.13	0.04	0.79	0.88
Dominican Republic	DOM	5.35	1	0.98	5.33
Eritrea	ERI	0.41	0.04	0.5	0.88
Ethiopia	ETH	8.16	8.11	1.46	1.5
Gabon	GAB	1.19	0.11	1.37	2.45
Gambia	GMB	0.21	0.03	0.46	0.64
Ghana	GHA	12.68	6.62	1.26	7.31
Guinea	GIN	3.14	0.7	0.4	2.84
Kenya	KEN	7.88	0.96	3.32	10.24
Lesotho	LSO	0.12	0.01	0.56	0.67
Liberia	LBR	0.92	0.42	1.07	1.58
Libya	LBY	2.47	0.02	2.24	4.7
Madagascar	MDG	4	2.35	0.31	1.97
Malawi	MWI	7.35	5.3	0.32	2.37
Mali	MLI	6.79	0.78	0.76	6.77
Mauritania	MRT	0.73	0.05	1.27	1.95
Mauritius	MUS	0.43	0.41	0.27	0.28
Morocco	MAR	16.5	1.91	4.16	18.74
Mozambique	MOZ	4.49	1.06	0.49	3.93
Namibia	NAM	0.36	0.1	0.42	0.69
Niger	NER	6.96	0.28	1.09	7.77
Nigeria	NGA	64.59	3.45	4.37	65.51
Rwanda	RWA	3.59	0.24	0.6	3.95
Sao Tome and Principe	STP	0.09	0.01	0.65	0.73
Senegal	SEN	3.11	0.53	0.63	3.2
Seychelles	SYC	0.01	0	0.88	0.89
Sierra Leone	SLE	2.61	0.12	1.35	3.84
Somalia	SOM	2.91	0.08	0.41	3.24
South Sudan	SSD	5.26	0.2	0.47	5.53
Sudan	SDN	21.24	0.13	0.32	21.43
Togo	TGO	1.33	1.32	0.48	0.49
Tunisia	TUN	4.37	0.7	3.77	7.44
Uganda	UGA	5.2	2.41	0.33	3.11
Tanzania	TZA	10.89	5.81	0.78	5.85
Zambia	ZMB	3	1.43	0.3	1.87
Zimbabwe	ZWE	3.6	3.43	0.34	0.5
Bahrain	BHR	0.04	0.01	0.77	0.8
Egypt	EGY	37.6	11.52	6.26	32.35
Iran	IRN	41.97	5.65	10.94	47.26
Iraq	IRQ	3.25	0.18	1.57	4.64
Israel	ISR	2.62	1.3	3.39	4.71
Jordan	JOR	1.25	0.57	1.8	2.49
Kuwait	KWT	0.15	0.04	2.2	2.31
Lebanon	LBN	1.86	0.86	6.23	7.22
Oman	OMN	0.69	0.62	1.84	1.9
Qatar	QAT	0.07	0	1.3	1.37
Saudi Arabia	SAU	3.03	0.37	13.46	16.13
Syrian Arab Republic	SYR	3.85	2.17	3.18	4.86
Former USSR	-	13.3	2.14	0.35	11.51
United Arab Emirates	ARE	0.33	0.19	5.55	5.69
Yemen	YEM	2.27	0.16	2.27	4.37

## Sheet: ST2_Land footprint flows
Description of countries and regions	ISO-alpha3 code	Land footprint generated from domestic production	Export-embedded land footprint	Import-embedded land footprint	Land footprint generated from domestic consumption
Austria	AUT	0.64	0.28	0.39	0.75
Belgium	BEL	0.7	0.37	0.91	1.24
Bulgaria	BGR	1.36	0.63	0.22	0.95
Cyprus	CYP	1.77	1.36	0.05	0.47
Czech Republic	CZE	0.81	0.2	0.28	0.89
Germany	DEU	3.53	1.02	3.84	6.35
Denmark	DNK	0.63	0.31	0.19	0.51
Estonia	EST	0.52	0.31	0.05	0.26
Spain	ESP	3.46	1.19	1.77	4.04
Finland	FIN	0.56	0.1	0.31	0.77
France	FRA	4.2	1.6	3.05	5.65
Greece	GRC	1.35	0.53	0.56	1.38
Croatia	HRV	1.02	0.38	0.14	0.78
Hungary	HUN	1.11	0.68	0.13	0.57
Ireland	IRL	1.77	1.06	0.39	1.09
Italy	ITA	3.63	0.44	3.74	6.93
Lithuania	LTU	0.41	0.22	0.08	0.27
Luxembourg	LUX	0.25	0.22	0.12	0.15
Latvia	LVA	0.68	0.49	0.09	0.28
Malta	MLT	0.04	0.03	0.04	0.05
Netherlands	NLD	1.08	0.61	1.36	1.83
Poland	POL	2.1	0.58	0.69	2.21
Portugal	PRT	1.26	0.31	0.7	1.65
Romania	ROM	2.6	1.3	0.36	1.66
Sweden	SWE	0.91	0.19	0.5	1.22
Slovenia	SVN	0.42	0.12	0.14	0.43
Slovakia	SVK	0.55	0.21	0.17	0.51
United Kingdom	GBR	4.3	0.5	3.15	6.95
United States	USA	84.54	15.85	14	82.69
Japan	JPN	2.27	0.02	4.87	7.12
China	CHN	45.02	0.85	17.74	61.91
Canada	CAN	15.66	7.64	2.06	10.07
Republic of Korea	KOR	1.46	0.01	2.98	4.42
Brazil	BRA	41.61	8.61	3.19	36.19
India	IND	22.68	2.74	2.21	22.15
Mexico	MEX	20	3.8	3.36	19.56
Russian Federation	RUS	39.96	10.66	5.99	35.29
Australia	AUS	29.11	8.07	1	22.04
Switzerland	CHE	0.36	0.05	0.54	0.84
Turkey	TUR	7.77	0.58	3	10.19
Norway	NOR	0.2	0.01	0.69	0.89
Indonesia	IDN	12.01	2.68	2.24	11.57
South Africa	ZAF	18.64	1.7	0.71	17.66
Afghanistan	AFG	4.35	0.4	0.13	4.08
Armenia	ARM	0.44	0.09	0.13	0.48
Azerbaijan	AZE	1.44	0.23	0.29	1.5
Bangladesh	BGD	4.26	0.27	0.23	4.22
Bhutan	BTN	0.15	0.01	0.34	0.49
Brunei	BRN	0.13	0.08	0.02	0.07
Cambodia	KHM	1.32	0.43	0.06	0.95
Democratic People's Republic of Korea	PRK	0.55	0.17	0.04	0.41
Fiji	FJI	1.44	1.09	0.2	0.55
French Polynesia	PYF	0.06	0	0.22	0.27
Georgia	GEO	0.46	0.16	0.26	0.56
Kazakhstan	KAZ	12.21	1.12	1.14	12.23
Kyrgyzstan	KGZ	1.93	0.42	0.4	1.9
Laos	LAO	1.1	0.43	0.04	0.72
Malaysia	MYS	3.11	2.35	1.54	2.3
Maldives	MDV	0.01	0	0.16	0.17
Mongolia	MNG	3.51	0.71	0.12	2.92
Myanmar	MMR	1.98	0.41	0.01	1.58
Nepal	NPL	1.3	0.23	0.11	1.18
New Caledonia	NCL	0.17	0	0.24	0.41
New Zealand	NZL	1.35	0.86	0.63	1.12
Pakistan	PAK	8.34	1.59	0.5	7.25
Papua New Guinea	PNG	1.25	0.64	0.16	0.77
Philippines	PHL	5.51	1.19	0.95	5.27
Samoa	WSM	0.03	0	0.11	0.15
Singapore	SGP	0.17	0.13	1.16	1.19
Srilanka	LKA	0.87	0.45	0.25	0.67
Tajikistan	TJK	1.56	0.63	0.21	1.14
Thailand	THA	3.61	1.64	0.85	2.83
Turkmenistan	TKM	7.66	1.15	0.77	7.28
Uzbekistan	UZB	5.94	0.93	0.7	5.71
Vanuatu	VUT	0.08	0.01	0.14	0.2
Viet Nam	VNM	3.33	0.8	0.61	3.14
Antigua and Barbuda	ATG	0.47	0.18	0.26	0.55
Argentina	ARG	26.34	8.8	0.97	18.51
Barbados	BRB	0.02	0.01	0.38	0.39
Belize	BLZ	0.07	0.06	0.02	0.03
Bolivia	BOL	5.93	5.03	0.55	1.46
Chile	CHL	3.48	2.81	1.32	1.98
Colombia	COL	7.27	0.8	0.8	7.28
Costa Rica	CRI	0.67	0.41	0.17	0.43
Cuba	CUB	2.37	0.33	0.33	2.37
Ecuador	ECU	1.35	0.54	0.26	1.07
El Salvador	SLV	0.43	0.15	0.14	0.42
Guatemala	GTM	1.5	0.74	0.53	1.29
Guyana	GUY	0.11	0.01	0.12	0.21
Haiti	HTI	1.3	0.2	0.28	1.38
Honduras	HND	0.67	0.22	0.18	0.63
Jamaica	JAM	0.25	0.11	0.11	0.25
Nicaragua	NIC	0.96	0.64	0.18	0.5
Panama	PAN	0.45	0.12	0.18	0.51
Paraguay	PRY	2.32	0.66	0.13	1.79
Peru	PER	3.58	0.64	0.42	3.37
Suriname	SUR	0.07	0.01	0.08	0.14
Trinidad and Tobago	TTO	0.24	0.21	0.08	0.1
Uruguay	URY	1.33	0.64	0.16	0.84
Venezuela	VEN	2.54	0.05	0.76	3.26
Albania	ALB	0.37	0.09	0.06	0.34
Belarus	BLR	0.97	0.23	0.09	0.83
Bosnia and Herzegovina	BIH	1.52	0.11	0.28	1.69
Iceland	ISL	1.85	1.6	0.03	0.28
Montenegro	YUG	0.1	0.04	0.31	0.36
Moldova	MDA	0.68	0.45	0.01	0.24
Serbia	SEB	1.14	0.44	0.67	1.37
The Former Yugoslav Republic of Macedonia	MKD	1.05	0.1	0.2	1.14
Ukraine	UKR	6.88	2.95	0.32	4.25
Algeria	DZA	9.77	0.17	1.89	11.48
Angola	AGO	10.57	0.11	1.95	12.41
Bahamas	BHS	0.04	0	1.06	1.1
Benin	BEN	1.4	0.27	0.26	1.4
Botswana	BWA	0.66	0.11	0.25	0.8
Burkina Faso	BFA	2.87	0.47	0.42	2.83
Burundi	BDI	1.46	0.11	0.98	2.33
Cameroon	CMR	2.61	0.63	0.25	2.24
Cape Verde	CPV	0.05	0.01	0.85	0.89
Central African Republic	CAF	3.24	0.28	0.66	3.63
Chad	TCD	9.01	2.11	0.32	7.22
Congo	COG	1.72	0.08	1.14	2.79
Cote d'Ivoire	CIV	3.9	1.35	0.26	2.81
The Democratic Republic of the Congo	COD	9.62	0.32	1.97	11.27
Djibouti	DJI	0.52	0.16	0.74	1.1
Dominican Republic	DOM	0.64	0.11	0.34	0.86
Eritrea	ERI	1.53	0.12	0.62	2.04
Ethiopia	ETH	3.93	3.87	0.87	0.94
Gabon	GAB	1.42	0.07	0.98	2.33
Gambia	GMB	0.53	0.09	0.51	0.96
Ghana	GHA	3.02	1	0.43	2.45
Guinea	GIN	3.04	0.58	0.32	2.78
Kenya	KEN	6.04	0.53	1.44	6.96
Lesotho	LSO	0.19	0.02	0.58	0.75
Liberia	LBR	0.86	0.26	0.98	1.58
Libya	LBY	5.44	0.05	1.12	6.51
Madagascar	MDG	3.02	0.83	0.34	2.53
Malawi	MWI	1.88	1.04	0.26	1.1
Mali	MLI	8.57	0.58	0.83	8.83
Mauritania	MRT	4.03	0.31	1.34	5.06
Mauritius	MUS	0.03	0.03	0.14	0.15
Morocco	MAR	6.73	0.91	1.38	7.19
Mozambique	MOZ	1.71	0.5	0.29	1.5
Namibia	NAM	0.57	0.26	0.22	0.53
Niger	NER	11.76	0.42	1.15	12.49
Nigeria	NGA	20.23	0.91	1.4	20.72
Rwanda	RWA	0.49	0.04	0.29	0.73
Sao Tome and Principe	STP	0.03	0.01	0.68	0.7
Senegal	SEN	2.73	0.43	0.36	2.66
Seychelles	SYC	0.02	0.01	0.8	0.81
Sierra Leone	SLE	2.13	0.11	1.31	3.33
Somalia	SOM	10.66	0.28	0.52	10.9
South Sudan	SSD	13.91	0.87	0.57	13.61
Sudan	SDN	39.24	0.21	0.45	39.48
Togo	TGO	0.61	0.59	0.36	0.38
Tunisia	TUN	1.57	0.28	0.55	1.84
Uganda	UGA	1.69	0.77	0.19	1.11
Tanzania	TZA	11.15	3.21	0.47	8.41
Zambia	ZMB	2.48	1.51	0.18	1.15
Zimbabwe	ZWE	8.96	8.73	0.16	0.39
Bahrain	BHR	0.02	0	0.17	0.19
Egypt	EGY	3.29	0.79	2.44	4.94
Iran	IRN	4.91	0.71	3.76	7.96
Iraq	IRQ	0.92	0.02	0.97	1.87
Israel	ISR	0.26	0.13	1.26	1.39
Jordan	JOR	0.12	0.06	0.49	0.56
Kuwait	KWT	0.02	0.01	0.46	0.47
Lebanon	LBN	0.26	0.1	2.54	2.7
Oman	OMN	0.11	0.09	0.59	0.62
Qatar	QAT	0.03	0	0.31	0.34
Saudi Arabia	SAU	3.03	0.24	2.46	5.24
Syrian Arab Republic	SYR	1.43	0.46	1.7	2.68
Former USSR	-	5.01	1.55	0.27	3.73
United Arab Emirates	ARE	0.07	0.04	1.56	1.59
Yemen	YEM	1.73	0.08	0.97	2.62

## Sheet: ST3_Regional species loss
Description of countries and regions	ISO-alpha3 code	Mammal	Bird	Amphibian	Reptile	Total
Austria	AUT	105	449	51	38	643
Belgium	BEL	101	330	40	29	500
Bulgaria	BGR	585	3017	218	355	4176
Cyprus	CYP	110	9368	232	1882	11592
Czech Republic	CZE	113	353	38	29	532
Germany	DEU	468	1529	178	112	2286
Denmark	DNK	215	839	81	31	1166
Estonia	EST	19	91	7	3	119
Spain	ESP	520	2935	254	475	4185
Finland	FIN	5	63	2	1	71
France	FRA	690	2872	314	300	4175
Greece	GRC	373	1567	123	276	2340
Croatia	HRV	336	1419	131	169	2054
Hungary	HUN	255	792	76	59	1182
Ireland	IRL	458	1561	82	46	2147
Italy	ITA	1246	5369	594	638	7847
Lithuania	LTU	27	96	8	5	136
Luxembourg	LUX	24	72	9	7	113
Latvia	LVA	31	147	11	5	193
Malta	MLT	5	15	2	3	26
Netherlands	NLD	151	476	60	42	729
Poland	POL	376	1284	118	64	1842
Portugal	PRT	138	1328	83	126	1677
Romania	ROM	582	2112	185	179	3058
Sweden	SWE	27	200	10	4	242
Slovenia	SVN	138	625	56	67	886
Slovakia	SVK	140	519	48	35	742
United Kingdom	GBR	1301	4631	248	142	6322
United States	USA	2562	9103	103	3068	14835
Japan	JPN	522	7271	625	386	8804
China	CHN	8698	34200	2743	4558	50199
Canada	CAN	724	4045	218	108	5096
Republic of Korea	KOR	671	2230	323	350	3575
Brazil	BRA	2562	9281	1918	1357	15118
India	IND	5469	19981	984	2345	28779
Mexico	MEX	6604	15998	2257	6465	31324
Russian Federation	RUS	1405	7289	269	337	9300
Australia	AUS	1220	7231	616	2673	11739
Switzerland	CHE	38	169	22	14	244
Turkey	TUR	3030	9500	516	1902	14948
Norway	NOR	6	71	2	1	80
Indonesia	IDN	2498	13361	1161	3203	20222
South Africa	ZAF	2411	6966	799	1743	11919
Afghanistan	AFG	1494	1437	56	233	3221
Armenia	ARM	110	248	18	73	449
Azerbaijan	AZE	518	1269	74	326	2186
Bangladesh	BGD	1675	5618	148	658	8099
Bhutan	BTN	33	235	14	11	292
Brunei	BRN	-6	31	4	7	35
Cambodia	KHM	390	1575	69	236	2270
Democratic People's Republic of Korea	PRK	67	886	46	45	1044
Fiji	FJI	-41	601	16	99	675
French Polynesia	PYF	0	896	0	550	1446
Georgia	GEO	138	334	27	97	596
Kazakhstan	KAZ	1392	2177	64	283	3915
Kyrgyzstan	KGZ	694	1731	32	157	2614
Laos	LAO	146	1106	66	132	1450
Malaysia	MYS	778	3683	416	824	5700
Maldives	MDV	12	346	0	41	399
Mongolia	MNG	640	1173	24	30	1866
Myanmar	MMR	835	3494	137	365	4831
Nepal	NPL	613	2526	107	180	3426
New Caledonia	NCL	3	92	0	39	133
New Zealand	NZL	21	25094	9	127	25251
Pakistan	PAK	1617	3250	108	627	5601
Papua New Guinea	PNG	-42	372	54	53	437
Philippines	PHL	768	8428	762	2396	12355
Samoa	WSM	9	169	0	41	219
Singapore	SGP	53	214	31	62	360
Srilanka	LKA	321	1701	256	401	2679
Tajikistan	TJK	397	710	17	105	1228
Thailand	THA	1817	6082	388	1087	9374
Turkmenistan	TKM	1183	1633	40	610	3467
Uzbekistan	UZB	768	1263	21	313	2366
Vanuatu	VUT	-1	38	0	8	46
Viet Nam	VNM	1817	6671	336	933	9757
Antigua and Barbuda	ATG	620	6250	335	2325	9530
Argentina	ARG	1553	4169	534	1064	7320
Barbados	BRB	8	92	10	57	167
Belize	BLZ	40	208	19	50	317
Bolivia	BOL	483	1084	138	138	1844
Chile	CHL	294	889	163	111	1457
Colombia	COL	1945	4290	832	950	8017
Costa Rica	CRI	533	1732	314	498	3077
Cuba	CUB	389	3606	541	1919	6455
Ecuador	ECU	532	1239	351	359	2482
El Salvador	SLV	215	413	114	227	969
Guatemala	GTM	597	1434	334	704	3069
Guyana	GUY	6	30	4	5	45
Haiti	HTI	150	1906	343	1094	3493
Honduras	HND	203	567	117	225	1112
Jamaica	JAM	89	1113	110	227	1539
Nicaragua	NIC	205	725	111	205	1245
Panama	PAN	385	1037	197	316	1934
Paraguay	PRY	61	189	67	52	370
Peru	PER	325	1179	197	201	1902
Suriname	SUR	9	45	4	6	64
Trinidad and Tobago	TTO	280	3589	53	234	4155
Uruguay	URY	32	71	37	23	162
Venezuela	VEN	600	1360	135	111	2207
Albania	ALB	127	563	48	77	815
Belarus	BLR	65	194	18	11	288
Bosnia and Herzegovina	BIH	369	2039	202	258	2868
Iceland	ISL	1	20	0	0	21
Montenegro	YUG	15	103	12	15	145
Moldova	MDA	90	229	19	20	358
Serbia	SEB	318	1229	100	156	1802
The Former Yugoslav Republic of Macedonia	MKD	225	917	76	129	1347
Ukraine	UKR	916	2628	214	260	4019
Algeria	DZA	247	590	23	205	1065
Angola	AGO	252	874	94	175	1394
Bahamas	BHS	6	133	16	100	256
Benin	BEN	12	36	3	9	60
Botswana	BWA	18	44	3	11	76
Burkina Faso	BFA	11	22	1	8	42
Burundi	BDI	113	443	45	86	688
Cameroon	CMR	240	1497	208	180	2126
Cape Verde	CPV	4	78	3	22	108
Central African Republic	CAF	8	71	8	13	100
Chad	TCD	170	416	7	57	650
Congo	COG	18	166	16	29	229
Cote d'Ivoire	CIV	245	893	106	150	1395
The Democratic Republic of the Congo	COD	389	1232	109	251	1981
Djibouti	DJI	122	403	12	78	616
Dominican Republic	DOM	94	1225	204	683	2205
Eritrea	ERI	123	404	15	81	623
Ethiopia	ETH	159	544	40	93	837
Gabon	GAB	14	217	35	32	299
Gambia	GMB	9	38	1	3	50
Ghana	GHA	120	481	57	79	737
Guinea	GIN	237	726	52	105	1121
Kenya	KEN	579	1466	71	186	2301
Lesotho	LSO	44	120	13	20	197
Liberia	LBR	76	228	35	43	381
Libya	LBY	53	109	5	40	206
Madagascar	MDG	298	586	197	424	1506
Malawi	MWI	272	865	98	103	1338
Mali	MLI	85	220	8	45	357
Mauritania	MRT	47	87	5	31	171
Mauritius	MUS	4	73	1	21	99
Morocco	MAR	1050	3180	123	960	5314
Mozambique	MOZ	53	294	28	62	437
Namibia	NAM	41	94	6	35	176
Niger	NER	78	163	8	55	303
Nigeria	NGA	1608	7414	589	1346	10957
Rwanda	RWA	113	441	34	77	665
Sao Tome and Principe	STP	11	249	27	47	333
Senegal	SEN	13	41	2	9	65
Seychelles	SYC	60	663	95	444	1262
Sierra Leone	SLE	175	591	63	87	916
Somalia	SOM	663	1390	158	373	2584
South Sudan	SSD	142	358	14	65	578
Sudan	SDN	399	1009	41	187	1635
Togo	TGO	12	45	5	8	71
Tunisia	TUN	127	368	11	114	620
Uganda	UGA	130	457	31	84	703
Tanzania	TZA	700	2537	233	382	3853
Zambia	ZMB	64	245	18	33	360
Zimbabwe	ZWE	126	643	48	109	927
Bahrain	BHR	2	8	0	2	12
Egypt	EGY	74	214	13	86	387
Iran	IRN	1175	2150	101	927	4353
Iraq	IRQ	118	270	5	79	473
Israel	ISR	27	67	2	23	119
Jordan	JOR	13	27	0	8	49
Kuwait	KWT	2	9	0	3	14
Lebanon	LBN	56	166	9	53	283
Oman	OMN	6	17	0	7	29
Qatar	QAT	2	6	0	2	10
Saudi Arabia	SAU	83	187	2	65	337
Syrian Arab Republic	SYR	357	724	16	177	1275
Former USSR	-	159	821	29	34	1045
United Arab Emirates	ARE	2	7	0	3	12
Yemen	YEM	103	252	3	102	460

## Sheet: ST4_Global species extinction
Description of countries and regions	ISO-alpha3 code	Mammal	Bird	Amphibian	Reptile	Total
Austria	AUT	3	1	2	1	7
Belgium	BEL	2	1	1	0	5
Bulgaria	BGR	10	4	2	4	20
Cyprus	CYP	37	3	1	161	201
Czech Republic	CZE	2	2	1	0	5
Germany	DEU	8	5	5	1	19
Denmark	DNK	1	1	1	0	3
Estonia	EST	0	1	0	0	1
Spain	ESP	9	8	16	40	72
Finland	FIN	0	1	0	0	1
France	FRA	12	8	16	11	48
Greece	GRC	8	2	13	13	35
Croatia	HRV	4	2	6	6	18
Hungary	HUN	4	2	3	1	10
Ireland	IRL	1	3	0	0	4
Italy	ITA	17	5	44	15	82
Lithuania	LTU	1	1	0	0	2
Luxembourg	LUX	1	0	0	0	1
Latvia	LVA	1	1	0	0	2
Malta	MLT	0	0	1	0	1
Netherlands	NLD	3	2	2	1	7
Poland	POL	6	4	2	0	12
Portugal	PRT	8	13	4	7	31
Romania	ROM	11	6	4	2	23
Sweden	SWE	0	1	0	0	2
Slovenia	SVN	2	1	2	2	7
Slovakia	SVK	2	1	1	0	5
United Kingdom	GBR	2	7	1	0	11
United States	USA	62	24	2	114	202
Japan	JPN	22	27	68	3	119
China	CHN	206	231	451	91	979
Canada	CAN	6	20	4	1	31
Republic of Korea	KOR	6	12	50	2	71
Brazil	BRA	74	170	271	20	534
India	IND	101	202	355	228	885
Mexico	MEX	147	136	379	411	1072
Russian Federation	RUS	24	49	4	10	86
Australia	AUS	49	112	60	17	239
Switzerland	CHE	1	0	1	0	3
Turkey	TUR	56	15	47	121	239
Norway	NOR	0	0	0	0	0
Indonesia	IDN	144	316	205	124	789
South Africa	ZAF	61	61	83	25	230
Afghanistan	AFG	9	5	3	2	18
Armenia	ARM	6	1	1	9	17
Azerbaijan	AZE	17	3	5	23	47
Bangladesh	BGD	12	35	14	11	72
Bhutan	BTN	1	3	3	1	8
Brunei	BRN	0	1	0	0	1
Cambodia	KHM	5	8	13	11	37
Democratic People's Republic of Korea	PRK	1	3	4	0	8
Fiji	FJI	-7	43	2	14	53
French Polynesia	PYF	0	90	0	0	90
Georgia	GEO	7	1	1	11	20
Kazakhstan	KAZ	18	9	1	1	29
Kyrgyzstan	KGZ	6	3	3	0	13
Laos	LAO	5	10	16	8	39
Malaysia	MYS	30	56	88	54	228
Maldives	MDV	0	0	0	0	0
Mongolia	MNG	5	3	0	0	8
Myanmar	MMR	14	28	30	26	97
Nepal	NPL	10	21	23	8	62
New Caledonia	NCL	0	7	0	14	22
New Zealand	NZL	2	482	4	4	491
Pakistan	PAK	20	18	10	10	58
Papua New Guinea	PNG	-3	14	10	1	22
Philippines	PHL	90	326	181	275	872
Samoa	WSM	0	18	0	5	22
Singapore	SGP	4	4	8	5	21
Srilanka	LKA	19	33	150	27	229
Tajikistan	TJK	7	2	4	0	14
Thailand	THA	25	34	46	46	151
Turkmenistan	TKM	11	6	0	4	21
Uzbekistan	UZB	10	5	2	3	21
Vanuatu	VUT	0	3	0	1	3
Viet Nam	VNM	29	48	95	62	235
Antigua and Barbuda	ATG	13	30	26	7	76
Argentina	ARG	123	82	97	25	328
Barbados	BRB	0	1	1	0	2
Belize	BLZ	0	1	3	1	5
Bolivia	BOL	17	24	26	4	71
Chile	CHL	34	25	72	11	142
Colombia	COL	37	94	290	14	434
Costa Rica	CRI	7	28	82	2	119
Cuba	CUB	19	49	148	17	233
Ecuador	ECU	15	44	149	8	215
El Salvador	SLV	4	7	32	8	51
Guatemala	GTM	10	19	92	27	147
Guyana	GUY	0	1	1	0	1
Haiti	HTI	6	36	157	22	221
Honduras	HND	4	9	43	9	66
Jamaica	JAM	4	27	43	5	79
Nicaragua	NIC	2	10	29	3	44
Panama	PAN	3	16	38	1	59
Paraguay	PRY	4	5	6	1	16
Peru	PER	14	44	91	5	154
Suriname	SUR	0	0	0	0	1
Trinidad and Tobago	TTO	7	12	28	9	56
Uruguay	URY	2	2	2	0	7
Venezuela	VEN	7	13	49	2	71
Albania	ALB	1	0	2	2	6
Belarus	BLR	1	1	0	0	3
Bosnia and Herzegovina	BIH	5	2	6	9	22
Iceland	ISL	0	0	0	0	0
Montenegro	YUG	0	0	0	0	1
Moldova	MDA	2	2	0	0	4
Serbia	SEB	8	3	2	3	16
The Former Yugoslav Republic of Macedonia	MKD	5	1	2	3	11
Ukraine	UKR	18	12	4	6	40
Algeria	DZA	10	4	3	16	32
Angola	AGO	3	9	6	2	20
Bahamas	BHS	0	1	1	1	3
Benin	BEN	1	1	0	1	2
Botswana	BWA	0	1	0	0	1
Burkina Faso	BFA	1	1	0	1	2
Burundi	BDI	9	10	17	1	37
Cameroon	CMR	13	16	40	3	73
Cape Verde	CPV	0	1	0	6	7
Central African Republic	CAF	1	2	1	0	4
Chad	TCD	3	2	0	1	5
Congo	COG	0	3	1	0	5
Cote d'Ivoire	CIV	14	15	27	10	65
The Democratic Republic of the Congo	COD	20	22	25	3	70
Djibouti	DJI	2	1	0	1	4
Dominican Republic	DOM	3	22	93	12	130
Eritrea	ERI	3	3	1	1	7
Ethiopia	ETH	10	9	7	2	27
Gabon	GAB	1	4	5	0	9
Gambia	GMB	0	0	0	0	1
Ghana	GHA	6	7	12	6	31
Guinea	GIN	6	4	21	4	35
Kenya	KEN	16	16	12	2	46
Lesotho	LSO	0	1	1	0	2
Liberia	LBR	6	6	11	2	26
Libya	LBY	3	1	0	2	6
Madagascar	MDG	70	29	89	120	308
Malawi	MWI	4	4	11	0	19
Mali	MLI	3	2	0	2	6
Mauritania	MRT	2	1	0	1	4
Mauritius	MUS	1	10	0	0	12
Morocco	MAR	39	14	14	72	139
Mozambique	MOZ	1	2	1	0	4
Namibia	NAM	1	1	0	0	3
Niger	NER	3	2	0	2	8
Nigeria	NGA	37	36	59	37	170
Rwanda	RWA	8	8	14	1	31
Sao Tome and Principe	STP	3	23	4	2	33
Senegal	SEN	1	1	0	1	3
Seychelles	SYC	7	14	62	58	142
Sierra Leone	SLE	11	11	21	6	48
Somalia	SOM	18	25	6	5	54
South Sudan	SSD	5	4	1	1	10
Sudan	SDN	13	10	3	3	29
Togo	TGO	1	1	1	1	3
Tunisia	TUN	4	2	3	12	21
Uganda	UGA	7	7	11	1	26
Tanzania	TZA	18	34	70	8	129
Zambia	ZMB	1	2	1	0	4
Zimbabwe	ZWE	3	4	3	1	11
Bahrain	BHR	0	0	0	0	0
Egypt	EGY	2	1	0	1	4
Iran	IRN	31	6	20	65	122
Iraq	IRQ	2	1	1	4	7
Israel	ISR	1	0	1	2	3
Jordan	JOR	0	0	0	1	1
Kuwait	KWT	0	0	0	0	0
Lebanon	LBN	1	0	3	5	10
Oman	OMN	0	0	0	0	1
Qatar	QAT	0	0	0	0	0
Saudi Arabia	SAU	2	2	0	4	7
Syrian Arab Republic	SYR	7	1	3	12	23
Former USSR	-	3	6	0	1	10
United Arab Emirates	ARE	0	0	0	0	0
Yemen	YEM	1	4	1	13	19

## Sheet: ST5_FLW in scenarios
Description of countries and regions	ISO-alpha3 code	Sall	Stop10	Smeat	Shotspot
Austria	AUT	-1.24	1.17	2.87	-1.49
Belgium	BEL	1.44	-1.2	2.16	-7.97
Bulgaria	BGR	2.93	4.07	4.69	3.35
Cyprus	CYP	2.12	2.21	2.24	2.07
Czech Republic	CZE	2.83	2.65	3.27	1.4
Germany	DEU	-6.18	2.45	21.4	-17.31
Denmark	DNK	4.81	0.25	4.37	-3.31
Estonia	EST	1.03	0.95	1.16	0.94
Spain	ESP	3.58	5.17	15.2	31
Finland	FIN	-0.89	0.56	1	0.21
France	FRA	-20.41	8.18	19.85	24.34
Greece	GRC	1.04	4.05	4.76	5.13
Croatia	HRV	1.82	2.87	2.88	2.57
Hungary	HUN	2.13	3.37	3.81	2.24
Ireland	IRL	4.6	-0.4	2.85	-3.03
Italy	ITA	10.03	11.59	19.65	34.69
Lithuania	LTU	-1.31	0.68	1.21	0.52
Luxembourg	LUX	-0.21	0.44	0.42	0.12
Latvia	LVA	0.75	1.12	1.44	1.07
Malta	MLT	0.03	0.12	0.15	0.05
Netherlands	NLD	3.78	-5.95	4.3	-18.69
Poland	POL	7.95	11.78	13.45	7.4
Portugal	PRT	2.15	2.6	3.79	5.51
Romania	ROM	5.87	9.07	9.67	7.72
Sweden	SWE	-0.32	0.99	2.25	-0.53
Slovenia	SVN	2.23	2.34	2.34	2.07
Slovakia	SVK	0.7	1.74	1.77	1.35
United Kingdom	GBR	-11.94	0.41	4.98	-9.05
United States	USA	76.67	188.48	186.29	152.83
Japan	JPN	-4.3	-1.59	9.65	5.84
China	CHN	-33.04	76.46	261.12	66.63
Canada	CAN	8.05	-0.08	24.61	-6.8
Republic of Korea	KOR	11.24	3.1	9.02	0.89
Brazil	BRA	107.58	155.2	161.38	145.17
India	IND	109.67	138.76	162.02	133.53
Mexico	MEX	38.05	52.18	54.86	48.25
Russian Federation	RUS	43.41	66.5	58.93	50.91
Australia	AUS	-3.43	8.64	19.17	10.9
Switzerland	CHE	-3.03	-0.86	1.35	-3.45
Turkey	TUR	38.55	54.6	51.65	52.78
Norway	NOR	-1.48	-1.29	0.64	-2.32
Indonesia	IDN	35.76	52.68	56.31	47.34
South Africa	ZAF	3.86	9.32	11.21	9.74
Afghanistan	AFG	2.92	3.27	3.36	3.21
Armenia	ARM	0.87	1.07	1.23	1.15
Azerbaijan	AZE	3.11	4.22	4.47	4.47
Bangladesh	BGD	17.75	21.76	23.1	21.36
Bhutan	BTN	0.36	0.41	0.42	0.4
Brunei	BRN	0.37	0.37	0.38	0.36
Cambodia	KHM	6.3	6.52	6.68	6.57
Democratic People's Republic of Korea	PRK	2.2	2.51	2.8	2.41
Fiji	FJI	2.05	2.17	2.4	1.89
French Polynesia	PYF	0.04	0.05	0.05	0.04
Georgia	GEO	0.76	1.13	1.37	1.18
Kazakhstan	KAZ	7.46	8.92	9.85	9.81
Kyrgyzstan	KGZ	2.74	2.86	2.94	2.88
Laos	LAO	2.92	3.25	3.35	3.13
Malaysia	MYS	18.34	9.49	16.64	22.41
Maldives	MDV	0.01	0.01	0.01	0.01
Mongolia	MNG	0.27	0.35	0.4	0.37
Myanmar	MMR	8.76	9.8	10.33	9.56
Nepal	NPL	4.52	4.7	4.9	4.68
New Caledonia	NCL	0.04	0.04	0.04	0.03
New Zealand	NZL	-5.4	-4.56	3.08	1.23
Pakistan	PAK	35.72	44.15	43.83	43.31
Papua New Guinea	PNG	1.77	1.88	2.07	1.63
Philippines	PHL	13.87	18.51	21.37	18.16
Samoa	WSM	0.07	0.08	0.08	0.07
Singapore	SGP	2.37	2.43	4.12	3.83
Srilanka	LKA	1.86	2.92	3.78	3.09
Tajikistan	TJK	3.12	3.29	3.35	3.3
Thailand	THA	38.49	38.48	46.81	45.47
Turkmenistan	TKM	2.27	2.42	2.41	2.43
Uzbekistan	UZB	14.82	15.84	15.74	15.87
Vanuatu	VUT	0.1	0.11	0.12	0.1
Viet Nam	VNM	22.78	20.51	25.03	26.42
Antigua and Barbuda	ATG	6.55	6.76	6.98	6.64
Argentina	ARG	13.69	20.72	30.2	16.74
Barbados	BRB	0.06	0.06	0.06	0.06
Belize	BLZ	0.65	0.68	0.73	0.65
Bolivia	BOL	3.9	4.72	5.08	4.22
Chile	CHL	-5.93	-3.14	2.57	-0.13
Colombia	COL	12.05	15.47	17.01	15.57
Costa Rica	CRI	2.61	3.69	4.75	3.06
Cuba	CUB	8.42	8.68	8.97	8.53
Ecuador	ECU	0.9	3.62	5.92	4.35
El Salvador	SLV	1.78	2.15	2.46	2.18
Guatemala	GTM	2.21	3.7	4.8	3.73
Guyana	GUY	0.06	0.2	0.32	0.09
Haiti	HTI	3.81	3.93	4.06	3.86
Honduras	HND	3.15	3.5	4.1	3.91
Jamaica	JAM	0.64	0.79	0.96	0.72
Nicaragua	NIC	1.23	1.48	1.78	1.77
Panama	PAN	0.27	0.97	1.23	0.91
Paraguay	PRY	2.12	3.39	4.15	3.13
Peru	PER	5.31	9.78	12.12	9.17
Suriname	SUR	0.04	0.12	0.19	0.05
Trinidad and Tobago	TTO	4.7	4.53	4.75	4.45
Uruguay	URY	-1.15	-0.71	1.19	-1.04
Venezuela	VEN	-1.11	3.52	3.84	3.07
Albania	ALB	1.85	1.98	1.98	1.9
Belarus	BLR	3.09	2.89	4.86	4.54
Bosnia and Herzegovina	BIH	2.2	2.59	2.76	2.45
Iceland	ISL	-0.46	0.04	0.47	-0.18
Montenegro	YUG	0.22	0.26	0.28	0.25
Moldova	MDA	1.88	2.05	2.25	2
Serbia	SEB	4.04	4.76	5.07	4.5
The Former Yugoslav Republic of Macedonia	MKD	1.6	1.88	2.01	1.78
Ukraine	UKR	22.88	25.33	28.76	24.31
Algeria	DZA	22.51	21.67	21.99	21.04
Angola	AGO	12.12	12.87	12.98	12.64
Bahamas	BHS	0.17	0.18	0.18	0.17
Benin	BEN	3.38	3.44	3.65	3.29
Botswana	BWA	-0.01	0.17	0.12	0.03
Burkina Faso	BFA	2.38	2.55	2.59	2.47
Burundi	BDI	3.81	3.89	3.93	3.85
Cameroon	CMR	7.9	8.93	9.11	8.55
Cape Verde	CPV	0.16	0.16	0.17	0.16
Central African Republic	CAF	2.81	2.99	3.01	2.9
Chad	TCD	2.19	2.32	2.34	2.26
Congo	COG	1.98	2.11	2.13	2.05
Cote d'Ivoire	CIV	5.57	7.29	8.21	7.15
The Democratic Republic of the Congo	COD	25.82	27.42	27.65	26.93
Djibouti	DJI	0.13	0.13	0.13	0.13
Dominican Republic	DOM	3.41	4.4	5.08	4.09
Eritrea	ERI	0.39	0.4	0.4	0.4
Ethiopia	ETH	6.21	7.51	8.03	7.29
Gabon	GAB	1.09	1.16	1.17	1.13
Gambia	GMB	0.2	0.21	0.21	0.2
Ghana	GHA	10.27	11.73	12.58	11.15
Guinea	GIN	2.93	3.05	3.12	3.01
Kenya	KEN	3.95	7.04	7.61	6.69
Lesotho	LSO	-0.2	0.04	0.1	-0.14
Liberia	LBR	0.86	0.89	0.92	0.87
Libya	LBY	2.47	2.38	2.42	2.31
Madagascar	MDG	3.44	3.77	3.99	3.82
Malawi	MWI	6.88	7.2	7.33	7.1
Mali	MLI	6.3	6.54	6.74	6.39
Mauritania	MRT	0.68	0.71	0.73	0.69
Mauritius	MUS	0.19	0.28	0.39	0.03
Morocco	MAR	11.27	14.94	16.07	14.52
Mozambique	MOZ	3.89	4.23	4.47	4.05
Namibia	NAM	-0.36	0.19	0.26	-0.14
Niger	NER	6.46	6.71	6.91	6.56
Nigeria	NGA	57.79	60.68	62.31	62.65
Rwanda	RWA	3.36	3.53	3.58	3.51
Sao Tome and Principe	STP	0.08	0.09	0.09	0.09
Senegal	SEN	2.49	2.85	3.03	2.63
Seychelles	SYC	0.01	0.01	0.01	0.01
Sierra Leone	SLE	2.42	2.51	2.59	2.45
Somalia	SOM	2.77	2.83	2.86	2.8
South Sudan	SSD	5.01	5.12	5.17	5.07
Sudan	SDN	20.24	20.68	20.91	20.48
Togo	TGO	1.08	1.18	1.31	1.1
Tunisia	TUN	3.4	3.89	4.23	3.46
Uganda	UGA	4.14	4.89	5.1	4.71
Tanzania	TZA	8.95	10.13	10.75	9.77
Zambia	ZMB	2.22	2.79	2.89	2.6
Zimbabwe	ZWE	2.67	3.11	3.54	2.9
Bahrain	BHR	0.24	-0.06	0.06	-0.1
Egypt	EGY	29.9	34.56	36.9	33.92
Iran	IRN	33.99	38.34	39.14	38.74
Iraq	IRQ	1.78	2.22	2.76	2.03
Israel	ISR	0.51	1.12	2.34	0.7
Jordan	JOR	-0.29	0.76	0.95	0.62
Kuwait	KWT	0.58	0.03	0.16	-0.01
Lebanon	LBN	1.02	1.27	1.58	1.16
Oman	OMN	1.2	0.48	0.74	0.4
Qatar	QAT	0.08	-0.06	0.04	-0.11
Saudi Arabia	SAU	1.08	1.16	2.87	0.53
Syrian Arab Republic	SYR	2.11	2.63	3.27	2.4
Former USSR	-	12.2	13.04	12.96	13.07
United Arab Emirates	ARE	-0.32	-1.72	0.62	-2.16
Yemen	YEM	1.24	1.55	1.93	1.41

## Sheet: ST6_Land footprint in scenarios
Description of countries and regions	ISO-alpha3 code	Sall	Stop10	Smeat	Shotspot
Austria	AUT	-0.23	0.22	0.52	-0.28
Belgium	BEL	0.24	-0.2	0.15	-1.34
Bulgaria	BGR	0.81	1.12	1.23	0.92
Cyprus	CYP	1.61	1.68	1.76	1.58
Czech Republic	CZE	0.62	0.58	0.72	0.3
Germany	DEU	-1.07	0.43	3.76	-3.01
Denmark	DNK	0.55	0.03	0.35	-0.38
Estonia	EST	0.42	0.38	0.48	0.38
Spain	ESP	0.71	1.03	2.24	6.15
Finland	FIN	-0.29	0.19	0.43	0.07
France	FRA	-3.27	1.31	2.16	3.9
Greece	GRC	0.26	1.03	1.09	1.3
Croatia	HRV	0.59	0.94	0.91	0.84
Hungary	HUN	0.54	0.85	0.88	0.57
Ireland	IRL	2.81	-0.25	1.74	-1.85
Italy	ITA	1.64	1.9	2.84	5.67
Lithuania	LTU	-0.3	0.16	0.31	0.12
Luxembourg	LUX	-0.08	0.18	0.18	0.05
Latvia	LVA	0.33	0.49	0.66	0.47
Malta	MLT	0.01	0.02	0.03	0.01
Netherlands	NLD	0.72	-1.14	0.74	-3.57
Poland	POL	1	1.48	1.47	0.93
Portugal	PRT	0.63	0.76	0.99	1.61
Romania	ROM	1.47	2.27	2.24	1.93
Sweden	SWE	-0.11	0.33	0.81	-0.18
Slovenia	SVN	0.37	0.39	0.39	0.34
Slovakia	SVK	0.19	0.47	0.49	0.36
United Kingdom	GBR	-5.32	0.18	0.63	-4.03
United States	USA	31.87	78.35	71.44	63.53
Japan	JPN	-0.78	-0.29	1.55	1.06
China	CHN	-5.09	11.54	-11.82	10.05
Canada	CAN	4.56	-0.05	13.33	-3.85
Republic of Korea	KOR	1.54	0.42	1.01	0.12
Brazil	BRA	26.49	38.22	30.78	35.74
India	IND	15.07	19.06	22.16	18.35
Mexico	MEX	12.96	17.78	11.63	16.44
Russian Federation	RUS	26.44	40.51	30.37	31.01
Australia	AUS	-4.19	10.55	7.12	13.31
Switzerland	CHE	-0.59	-0.17	0.26	-0.67
Turkey	TUR	5.41	7.67	6.22	7.41
Norway	NOR	-0.35	-0.3	0.15	-0.55
Indonesia	IDN	7.48	11.01	11.79	9.9
South Africa	ZAF	5.88	14.17	12.24	14.82
Afghanistan	AFG	3.68	4.13	3.73	4.04
Armenia	ARM	0.28	0.35	0.31	0.37
Azerbaijan	AZE	0.92	1.24	0.9	1.32
Bangladesh	BGD	3.22	3.95	4.16	3.88
Bhutan	BTN	0.13	0.14	0.13	0.14
Brunei	BRN	0.12	0.13	0.13	0.12
Cambodia	KHM	1.22	1.27	0.49	1.28
Democratic People's Republic of Korea	PRK	0.41	0.47	0.43	0.45
Fiji	FJI	1.2	1.27	1.38	1.1
French Polynesia	PYF	0.05	0.05	0.05	0.04
Georgia	GEO	0.24	0.35	0.3	0.37
Kazakhstan	KAZ	8.88	10.63	9.77	11.68
Kyrgyzstan	KGZ	1.74	1.81	1.6	1.83
Laos	LAO	0.94	1.04	-0.48	1
Malaysia	MYS	3.34	1.73	2.65	4.08
Maldives	MDV	0.01	0.01	0.01	0.01
Mongolia	MNG	2.13	2.73	2.9	2.87
Myanmar	MMR	1.61	1.8	1.77	1.76
Nepal	NPL	1.19	1.24	1.25	1.23
New Caledonia	NCL	0.14	0.15	0.15	0.13
New Zealand	NZL	-1.85	-1.56	0.95	0.42
Pakistan	PAK	6.4	7.92	7.65	7.77
Papua New Guinea	PNG	1.03	1.1	0.4	0.95
Philippines	PHL	3.34	4.45	0.77	4.37
Samoa	WSM	0.03	0.03	0.02	0.03
Singapore	SGP	0.09	0.09	-0.22	0.14
Srilanka	LKA	0.42	0.66	0.82	0.69
Tajikistan	TJK	1.43	1.5	1.39	1.51
Thailand	THA	2.91	2.91	3.27	3.44
Turkmenistan	TKM	7.03	7.51	7.13	7.53
Uzbekistan	UZB	5.45	5.82	3.75	5.84
Vanuatu	VUT	0.06	0.07	0.04	0.06
Viet Nam	VNM	2.98	2.68	3.13	3.46
Antigua and Barbuda	ATG	0.43	0.44	0.4	0.44
Argentina	ARG	11.24	17.01	17.25	13.74
Barbados	BRB	0.02	0.02	0.02	0.02
Belize	BLZ	0.06	0.06	0.04	0.06
Bolivia	BOL	4.4	5.33	3.43	4.77
Chile	CHL	-6.3	-3.34	1.16	-0.14
Colombia	COL	4.8	6.16	3.79	6.2
Costa Rica	CRI	0.36	0.5	0.56	0.42
Cuba	CUB	2.18	2.25	1.95	2.21
Ecuador	ECU	0.2	0.79	1.1	0.95
El Salvador	SLV	0.3	0.36	0.34	0.37
Guatemala	GTM	0.64	1.07	0.83	1.07
Guyana	GUY	0.02	0.06	-0.04	0.03
Haiti	HTI	1.2	1.23	1.01	1.21
Honduras	HND	0.5	0.55	0.51	0.62
Jamaica	JAM	0.16	0.2	0.15	0.18
Nicaragua	NIC	0.59	0.71	0.5	0.85
Panama	PAN	0.08	0.3	-0.07	0.28
Paraguay	PRY	1.05	1.67	-1.63	1.54
Peru	PER	1.46	2.69	1.01	2.53
Suriname	SUR	0.01	0.04	0.04	0.02
Trinidad and Tobago	TTO	0.23	0.23	0.23	0.22
Uruguay	URY	-1.07	-0.66	0.8	-0.97
Venezuela	VEN	-0.53	1.68	-1.32	1.46
Albania	ALB	0.33	0.35	0.34	0.34
Belarus	BLR	0.51	0.47	0.67	0.74
Bosnia and Herzegovina	BIH	1.18	1.39	1.41	1.31
Iceland	ISL	-1.64	0.15	1.64	-0.64
Montenegro	YUG	0.07	0.09	0.09	0.08
Moldova	MDA	0.55	0.6	0.65	0.58
Serbia	SEB	0.88	1.04	1.08	0.98
The Former Yugoslav Republic of Macedonia	MKD	0.81	0.95	0.95	0.9
Ukraine	UKR	5.28	5.84	6.25	5.61
Algeria	DZA	9.77	9.4	7.94	9.13
Angola	AGO	9.75	10.36	8.23	10.17
Bahamas	BHS	0.04	0.04	0.03	0.04
Benin	BEN	1.29	1.32	1.36	1.26
Botswana	BWA	-0.05	0.53	0.15	0.11
Burkina Faso	BFA	2.59	2.78	2.56	2.69
Burundi	BDI	1.39	1.42	1.14	1.41
Cameroon	CMR	2.24	2.53	2.38	2.43
Cape Verde	CPV	0.04	0.05	0.05	0.05
Central African Republic	CAF	2.98	3.16	2.76	3.08
Chad	TCD	8.27	8.79	8.46	8.55
Congo	COG	1.58	1.68	0.9	1.64
Cote d'Ivoire	CIV	2.63	3.44	3.17	3.37
The Democratic Republic of the Congo	COD	8.88	9.43	2.91	9.26
Djibouti	DJI	0.5	0.51	0.51	0.5
Dominican Republic	DOM	0.41	0.52	0.51	0.49
Eritrea	ERI	1.46	1.49	1.48	1.47
Ethiopia	ETH	2.99	3.62	3.71	3.52
Gabon	GAB	1.31	1.39	1.23	1.35
Gambia	GMB	0.49	0.51	0.53	0.5
Ghana	GHA	2.44	2.79	1.95	2.65
Guinea	GIN	2.83	2.95	2.85	2.91
Kenya	KEN	3.03	5.4	5.4	5.13
Lesotho	LSO	-0.32	0.06	0.08	-0.22
Liberia	LBR	0.8	0.83	0.73	0.81
Libya	LBY	5.44	5.24	4.81	5.09
Madagascar	MDG	2.6	2.84	2.9	2.88
Malawi	MWI	1.76	1.84	1.77	1.81
Mali	MLI	7.96	8.26	8.27	8.08
Mauritania	MRT	3.74	3.88	3.98	3.79
Mauritius	MUS	0.01	0.02	0	0
Morocco	MAR	4.6	6.09	5.58	5.92
Mozambique	MOZ	1.48	1.61	1.48	1.54
Namibia	NAM	-0.59	0.31	-0.19	-0.23
Niger	NER	10.91	11.33	11.44	11.07
Nigeria	NGA	18.1	19.01	4.52	19.63
Rwanda	RWA	0.45	0.48	0.47	0.47
Sao Tome and Principe	STP	0.03	0.03	0.01	0.03
Senegal	SEN	2.19	2.5	2.14	2.31
Seychelles	SYC	0.02	0.02	0.02	0.02
Sierra Leone	SLE	1.97	2.05	1.96	2
Somalia	SOM	10.16	10.38	10.45	10.28
South Sudan	SSD	13.25	13.54	13.55	13.41
Sudan	SDN	37.39	38.2	37.15	37.83
Togo	TGO	0.49	0.54	0.49	0.5
Tunisia	TUN	1.22	1.4	1.4	1.24
Uganda	UGA	1.35	1.59	1.58	1.53
Tanzania	TZA	9.17	10.38	10.44	10.01
Zambia	ZMB	1.83	2.3	1.23	2.15
Zimbabwe	ZWE	6.65	7.73	8.09	7.22
Bahrain	BHR	0.09	-0.02	0.03	-0.04
Egypt	EGY	2.62	3.03	3.06	2.97
Iran	IRN	3.98	4.49	3.99	4.53
Iraq	IRQ	0.5	0.63	0.44	0.57
Israel	ISR	0.05	0.11	0.19	0.07
Jordan	JOR	-0.03	0.07	0.02	0.06
Kuwait	KWT	0.07	0	0.02	0
Lebanon	LBN	0.14	0.18	0.16	0.16
Oman	OMN	0.19	0.08	0.14	0.06
Qatar	QAT	0.03	-0.02	-0.01	-0.04
Saudi Arabia	SAU	1.07	1.16	2.07	0.53
Syrian Arab Republic	SYR	0.78	0.98	0.78	0.89
Former USSR	-	4.6	4.92	4.38	4.93
United Arab Emirates	ARE	-0.07	-0.36	0.18	-0.46
Yemen	YEM	0.95	1.18	0.66	1.08

## Sheet: ST7_Remaining resources loss
	Sall	Stop10	Smeat	Shotspot
FLW (Mt)	1125.4	1640.2	2090.1	1568.1
Land footprint (Mha)	445.3	624.9	554.5	586
Regional species loss (species*years)	215500	354665	421099	352682
Mammal	35720	59247	66802	57400
Bird	145929	234009	280112	232951
Amphibian	9376	17003	20659	17425
Reptile	24475	44406	53527	44906
Global species extinction (species*years)	5549	9300	10990	9592
Mammal	869	1502	1786	1518
Bird	1864	2714	2887	2699
Amphibian	1621	3086	3889	3302
Reptile	1196	1999	2429	2073

## Sheet: Countries
RMRIO	num1	FABIO	num2	FAOSTAT	num3	GTAP	num4	num4_1	GDP	num5	Map	num6	num6_1	Bio	num7_1	num7_2	num4_2	Map_code
Austria	1	Armenia	46	Afghanistan	45	Albania	1	5	Aruba	12	<missing>	1	170	Aruba	1	13	4
Belgium	2	Afghanistan	45	Africa	9999	Argentina	2	10	Afghanistan	15	Greenland	2	164	Antigua and Barbuda	2	20	79	GRL
Bulgaria	3	Albania	104	Albania	104	Armenia	3	16	Angola	19	Canada	3	183	Afghanistan	3	32	102	CAN
Cyprus	4	Algeria	113	Algeria	113	Australia	4	29	Albania	49	United States	4	218	Algeria	4	55	24	USA
Czech Republic	5	Angola	114	Americas	9999	Austria	5	30	Andorra	50	Saint Pierre and Miquelon	5	167	Azerbaijan	5	69	47	SPM
Germany	6	Antigua and Barbuda	80	Angola	114	Azerbaijan	6	41	United Arab Emirates	51	Bermuda	6	160	Albania	6	87	56	BMU
Denmark	7	Argentina	81	Antigua and Barbuda	80	Bahrain	7	31	Argentina	54	Bahamas	7	158	Armenia	7	56	60	BHS
Estonia	8	Australia	38	Argentina	81	Bangladesh	8	36	Armenia	61	Turks and Caicos Islands	8	155	Andorra	8	65	73	TCA
Spain	9	Austria	1	Armenia	46	Belarus	9	120	American Samoa	60	Cuba	9	193	Angola	9	207	124	CUB
Finland	10	Bahamas	115	Asia	9999	Belgium	10	38	Antigua and Barbuda	63	Mexico	10	153	American Samoa	10	71	95	MEX
France	11	Bahrain	163	Australia	38	Benin	11	39	Australia	65	Cayman Islands	11	165	Argentina	11	77	15	CYM
Greece	12	Barbados	82	Australia and New Zealand	9999	Bolivia	12	43	Austria	77	Haiti	12	189	Australia	12	90	18	HTI
Croatia	13	Belgium-Luxembourg	9999	Austria	1	Botswana	13	28	Azerbaijan	85	Puerto Rico	13	179	Austria	13	99	50	PRI
Hungary	14	Bangladesh	48	Azerbaijan	47	Brazil	14	48	Burundi	87	Virgin Islands,British	14	171	ANGUILLA	14	100	63	VGB
Ireland	15	Bolivia (Plurinational State of)	84	Bahamas	115	Brunei Darussalam	15	52	Belgium	91	Dominican Republic	15	163	Antarctica	15	63	69	DOM
Italy	16	Botswana	117	Bahrain	163	Bulgaria	16	54	Benin	96	Virgin Islands,U.S.	16	182	Bahrain	16	108	88	VIR
Lithuania	17	Brazil	34	Bangladesh	48	Burkina Faso	17	65	Burkina Faso	116	Anguilla	17	157	Barbados	17	128	115	AIA
Luxembourg	18	Belize	83	Barbados	82	Cambodia	18	66	Bangladesh	117	Jamaica	18	166	Botswana	18	133	127	JAM
Latvia	19	Solomon Islands	9999	Belarus	105	Cameroon	19	64	Bulgaria	118	Saint Kitts and Nevis	19	156	BERMUDA	19	127	139	KNA
Malta	20	Brunei Darussalam	50	Belgium	2	Canada	20	70	Bahrain	130	Antigua and Barbuda	20	191	Belgium	20	150	106	ATG
Netherlands	21	Bulgaria	3	Belgium-Luxembourg	9999	Caribbean	21	78	Bahamas, The	145	Montserrat	21	161	Bahamas	21	169	8	MSR
Poland	22	Myanmar	64	Belize	83	Central Africa	22	89	Bosnia and Herzegovina	157	Belize	22	162	Bangladesh	22	182	49	BLZ
Portugal	23	Burundi	119	Benin	116	Chile	23	90	Belarus	160	Guadeloupe	23	192	Belize	23	184	77	GLP
Romania	24	Cameroon	120	Bhutan	49	China	24	110	Belize	165	Guatemala	24	175	Bosnia and Herzegovina	24	191	84	GTM
Sweden	25	Canada	32	Bolivia (Plurinational State of)	84	Colombia	25	122	Bermuda	183	Dominica	25	149	Bolivia (Plurinational State of)	25	212	121	DMA
Slovenia	26	Cabo Verde	121	Bosnia and Herzegovina	106	Costa Rica	26	117	Bolivia	182	Martinique	26	174	Myanmar	26	202	105	MTQ
Slovakia	27	Central African Republic	122	Botswana	117	Cote d'Ivoire	27	116	Brazil	181	Nicaragua	27	168	Benin	27	130	20	NIC
UK	28	Sri Lanka	73	Brazil	34	Croatia	28	135	Barbados	69	Saint Lucia	28	154	Belarus	28	228	136	LCA
USA	29	Chad	123	Brunei Darussalam	50	Cyprus	29	136	Brunei Darussalam	204	El Salvador	29	4	Solomon Islands	29	216	72	SLV
Japan	30	Chile	85	Bulgaria	3	Czech Republic	30	56	Bhutan	99	Honduras	30	233	Brazil	30	111	101	HND
China	31	China, mainland	31	Burkina Faso	118	Denmark	31	24	Botswana	37	Barbados	31	247	Bhutan	31	42	2	BRB
Canada	32	Colombia	86	Burundi	119	Dominican Republic	32	20	Central African Republic	33	Saint Vincent and the Grenadines	32	3	Bulgaria	32	36	12	VCT
South Korea	33	Congo	124	Cabo Verde	121	Ecuador	33	60	Canada	106	Aruba	33	234	BOUVET_ISLAND	33	121	14	ABW
Brazil	34	Costa Rica	87	Cambodia	51	Egypt	34	14	Switzerland	27	Colombia	34	138	Brunei Darussalam	34	30	23	COL
India	35	Cuba	88	Cameroon	120	El Salvador	35	49	Channel Islands	90	Grenada	35	237	Burundi	35	104	25	GRD
Mexico	36	Cyprus	4	Canada	32	Estonia	36	72	Chile	126	Netherlands Antilles	36	10	Canada	36	154	33	ANT
Russia	37	Czechoslovakia	9999	Caribbean	9999	Ethiopia	37	111	China	166	Trinidad and Tobago	37	148	Cambodia	37	194	86	TTO
Australia	38	Azerbaijan	47	Central African Republic	122	Finland	38	4	Côte d'Ivoire	11	Costa Rica	38	50	Chad	38	12	87	CRI
Switzerland	39	Benin	116	Central America	9999	France	39	123	Cameroon	34	France	39	172	Sri Lanka	39	215	137	FRA
Turkey	40	Denmark	7	Central Asia	9999	Georgia	40	131	Congo, Dem. Rep.	198	Panama	40	243	Congo	40	158	138	PAN
China; Taiwan Province of	41	Dominica	9999	Chad	123	Germany	41	124	Congo, Rep.	9999	Marshall Islands	41	9999	Democratic Republic of the Congo	41	224	104	MHL
Norway	42	Dominican Republic	128	Chile	85	Ghana	42	82	Colombia	146	Palau	42	151	China	42	170	26	PLW
Indonesia	43	Belarus	105	China	9999	Greece	43	50	Comoros	88	Kiribati	43	238	Chile	43	102	44	KIR
South Africa	44	Ecuador	89	China; Hong Kong SAR	56	Guatemala	44	118	Cabo Verde	214	United States	44	128	Cayman Islands	44	199	46	USA
Afghanistan	45	Egypt	164	China; Macao SAR	60	Guinea	45	105	Costa Rica	2	Nauru	45	201	COCOS__KEELING__ISLANDS	45	3	80	NRU
Armenia	46	El Salvador	90	China; mainland	31	Honduras	46	3	Cuba	8	Solomon Islands	46	198	Cameroon	46	7	85	SLB
Azerbaijan	47	Estonia	8	China; Taiwan Province of	41	Hong Kong	47	6	Curaçao	13	Papua New Guinea	47	221	Comoros	47	5	35	PNG
Bangladesh	48	Fiji	53	Colombia	86	Hungary	48	8	Cayman Islands	18	Cook Islands	48	223	Colombia	48	22	93	COK
Bhutan	49	Finland	10	Comoros	9999	India	49	105	Cyprus	30	American Samoa	49	205	Northern Mariana Islands	49	31	32	ASM
Brunei	50	France	11	Congo	124	Indonesia	50	15	Czechia	29	Australia	50	208	Costa Rica	50	34	55	AUS
Cambodia	51	French Polynesia	54	Cook Islands	9999	Iran Islamic Republic of	51	18	Germany	103	Vanuatu	51	227	Central African Republic	51	37	91	VUT
North Korea	52	Djibouti	127	Costa Rica	87	Ireland	52	95	Djibouti	159	Fiji	52	244	Cuba	52	119	129	FJI
Fiji	53	Georgia	55	Côte d'Ivoire	125	Israel	53	102	Dominica	64	Tonga	53	52	Cape Verde	53	72	21	TON
French Polynesia	54	Gabon	131	Croatia	13	Italy	54	102	Denmark	163	Niue	54	65	COOK_ISLANDS	54	76	5	NIU
Georgia	55	Gambia	132	Cuba	88	Jamaica	55	40	Dominican Republic	70	New Caledonia	55	216	Cyprus	55	81	10	NCL
China; Hong Kong SAR	56	Germany	6	Cyprus	4	Japan	56	47	Algeria	83	Pitcairn	56	9999	Denmark	56	42	16	PCN
Kazakhstan	57	Bosnia and Herzegovina	106	Czechia	5	Jordan	57	58	Ecuador	100	Norfolk Island	57	225	Djibouti	57	124	28	NFK
Kyrgyzstan	58	Ghana	133	Czechoslovakia	9999	Kazakhstan	58	62	Egypt, Arab Rep.	102	Heard Island and Mcdonald Islands	58	197	Dominica	58	118	29	HMD
Laos	59	Kiribati	9999	Democratic People's Republic of Korea	52	Kenya	59	63	Eritrea	108	Bouvet Island	59	206	JARVIS_ISLAND	59	125	30	BVT
China; Macao SAR	60	Greece	12	Democratic Republic of the Congo	126	Korea	60	95	Spain	119	Northern Mariana Islands	60	9999	Dominican Republic	60	42	31	MNP
Malaysia	61	Grenada	9999	Denmark	7	Kuwait	61	69	Estonia	139	Antarctica	61	236	Ecuador	61	155	36	ATA
Maldives	62	Guatemala	91	Djibouti	127	Kyrgyztan	62	105	Ethiopia	125	South Georgia and the South Sandwich Islands	62	207	Egypt	62	152	38	SGS
Mongolia	63	Guinea	134	Dominica	9999	Lao People's Democratic Republic	63	73	Finland	133	Tuvalu	63	211	Ireland	63	140	39	TUV
Myanmar	64	Guyana	92	Dominican Republic	128	Latvia	64	106	Fiji	131	Tokelau	64	232	Equatorial Guinea	64	26	41	TKL
Nepal	65	Haiti	93	Eastern Africa	9999	Lithuania	65	77	France	147	French Polynesia	65	204	Estonia	65	171	43	PYF
New Caledonia	66	Honduras	94	Eastern Asia	9999	Luxembourg	66	102	Faroe Islands	141	French Southern Territories	66	55	Eritrea	66	163	48	ATF
New Zealand	67	China, Hong Kong SAR	56	Eastern Europe	9999	Madagascar	67	79	Micronesia, Fed. Sts.	149	Samoa	67	72	El Salvador	67	175	52	WSM
Pakistan	68	Hungary	14	Ecuador	89	Malawi	68	84	Gabon	151	The Federated States of Micronesia	68	220	Ethiopia	68	181	54	FSM
Papua New Guinea	69	Croatia	13	Egypt	164	Malaysia	69	102	United Kingdom	156	Wallis and Futuna	69	47	Czech Republic	69	185	64	WLF
Philippines	70	Iceland	107	El Salvador	90	Malta	70	88	Georgia	154	Cocos (Keeling) Islands	70	239	French Guiana	70	192	65	CCK
Samoa	71	India	35	Equatorial Guinea	9999	Mauritius	71	102	Ghana	211	Prince Edward Island	71	67	Finland	71	244	66	SF
Singapore	72	Indonesia	43	Eritrea	129	Mexico	72	115	Gibraltar	171	New Zealand	72	224	Fiji	72	205	70	NZL
Sri Lanka	73	Iran (Islamic Republic of)	165	Estonia	8	Mongolia	73	121	Guinea	114	Wake Island	73	228	Falkland Islands (malvinas) *	73	39	78	USA
Tajikistan	74	Iraq	166	Eswatini	9999	Morocco	74	125	Gambia, The	192	Algeria	74	230	Micronesia (Federated States of)	74	219	89	DZA
Thailand	75	Ireland	15	Ethiopia	130	Mozambique	75	127	Guinea-Bissau	191	Tunisia	75	241	Faroe Islands	75	218	90	TUN
Turkmenistan	76	Israel	167	Ethiopia PDR	9999	Namibia	76	99	Equatorial Guinea	193	Libya	76	195	French Polynesia	76	225	110	LBY
Uzbekistan	77	Italy	16	Europe	9999	Nepal	77	99	Greece	205	Morocco	77	242	France	77	233	116	MAR
Vanuatu	78	Côte d'Ivoire	125	European Union (27)	9999	Netherlands	78	102	Grenada	210	Egypt	78	51	French Southern & Antarctic Lands	78	167	117	EGY
Viet Nam	79	Kazakhstan	57	Faroe Islands	9999	New Zealand	79	139	Greenland	209	Western Sahara	79	246	Gambia	79	237	120	ESH
Antigua	80	Jamaica	95	Fiji	53	Nicaragua	80	21	Guatemala	10	Mali	80	20	Gabon	80	2	122	MLI
Argentina	81	Japan	30	Finland	10	Nigeria	81	2	Guam	7	Mauritania	81	142	Georgia	81	11	135	MRT
Barbados	82	Jordan	168	France	11	Norway	82	21	Guyana	28	Niger	82	31	Ghana	82	17	123	NER
Belize	83	Kyrgyzstan	58	French Guiana	9999	Oman	83	93	Hong Kong SAR, China	24	Sudan	83	22	Gibraltar	83	23	82	SDN
Bolivia	84	Kenya	135	French Polynesia	54	Pakistan	84	12	Honduras	26	Senegal	84	139	Grenada	84	25	94	SEN
Chile	85	Cambodia	51	Gabon	131	Panama	85	23	Croatia	36	Cape Verde	85	144	GUERNSEY	85	43	1	CPV
Colombia	86	Democratic People's Republic of Korea	52	Gambia	132	Paraguay	86	25	Haiti	42	Ethiopia	86	146	Greenland	86	48	9	ETH
Costa Rica	87	Republic of Korea	33	Georgia	55	Peru	87	26	Hungary	45	Gambia	87	38	Germany	87	50	111	GMB
Cuba	88	Kuwait	169	Germany	6	Philippines	88	21	Indonesia	46	Burkina Faso	88	9	Guadeloupe	88	52	133	BFA
Ecuador	89	Latvia	19	Ghana	133	Poland	89	33	Isle of Man	57	Eritrea	89	137	GUAM	89	61	97	ERI
El Salvador	90	Lao People's Democratic Republic	59	Greece	12	Portugal	90	35	India	174	Guinea-Bissau	90	29	Greece	90	67	98	GNB
Guatemala	91	Lebanon	170	Grenada	9999	Puerto Rico	91	44	Ireland	80	Djibouti	91	24	Guatemala	91	91	58	DJI
Guyana	92	Lesotho	136	Guadeloupe	9999	Qatar	92	104	Iran, Islamic Rep.	82	Guinea	92	134	Guinea	92	93	62	GIN
Haiti	93	Liberia	137	Guatemala	91	Rest of Central America	93	21	Iraq	86	Chad	93	12	Guyana	93	95	125	TCD
Honduras	94	Libya	138	Guinea	134	Rest of EFTA	94	46	Iceland	84	Nigeria	94	30	Gaza Strip	94	97	99	NGA
Jamaica	95	Lithuania	17	Guinea-Bissau	9999	Rest of East Asia	95	55	Israel	97	Cote d'Ivoire	95	18	Haiti	95	113	3	CIV
Nicaragua	96	China, Macao SAR	60	Guyana	92	Rest of Eastern Africa	96	80	Italy	144	Central African Republic	96	27	HEARD_ISLAND___MCDONALD_ISLANDS	96	174	6	CAF
Panama	97	Madagascar	139	Haiti	93	Rest of Eastern Europe	97	85	Jamaica	152	Ghana	97	40	Honduras	97	183	40	GHA
Paraguay	98	Malawi	140	Honduras	94	Rest of Europe	98	86	Jordan	161	Sierra Leone	98	141	HOWLAND_ISLAND	98	176	7	SLE
Peru	99	Malaysia	61	Hungary	14	Rest of Former Soviet Union	99	87	Japan	153	Benin	99	140	Croatia	99	178	51	BEN
Suriname	100	Maldives	62	Iceland	107	Rest of North Africa	100	104	Kazakhstan	180	Togo	100	135	Hungary	100	172	53	TGO
Trinidad and Tobago	101	Mali	141	India	35	Rest of North America	101	129	Kenya	196	Liberia	101	37	Iceland	101	217	57	LBR
Uruguay	102	Malta	20	Indonesia	43	Rest of Oceania	102	137	Kyrgyz Republic	203	Cameroon	102	143	Indonesia	102	232	61	CMR
Venezuela	103	Mauritania	142	Iran (Islamic Republic of)	165	Rest of South African Customs	103	138	Cambodia	9999	Uganda	103	133	Isle of Man	103	235	83	UGA
Albania	104	Mauritius	143	Iraq	166	Rest of South America	104	1	Kiribati	4	Equatorial Guinea	104	188	India	104	6	92	GNQ
Belarus	105	Mexico	36	Ireland	15	Rest of South Asia	105	9	St. Kitts and Nevis	23	Congo	105	159	BRITISH_INDIAN_OCEAN_TERRITORY	105	28	113	COG
Bosnia and Herzegovina	106	Mongolia	63	Israel	167	Rest of Southeast Asia	106	98	Korea, Rep.	22	Sao Tome and Principe	106	178	Iran (Islamic Republic of)	106	24	131	STP
Iceland	107	Morocco	144	Italy	16	Rest of Western Africa	107	94	Kuwait	94	Gabon	107	150	Israel	107	101	134	GAB
Montenegro	108	Mozambique	145	Jamaica	95	Rest of Western Asia	108	98	Lao PDR	132	Somalia	108	186	Italy	108	153	108	SOM
Moldova	109	Republic of Moldova	109	Japan	30	Rest of the World	109	97	Lebanon	123	Rwanda	109	169	Côte d'Ivoire	109	138	34	RWA
Serbia	110	Namibia	146	Jordan	168	Romania	110	98	Liberia	177	Kenya	110	176	Iraq	110	208	74	KEN
North Macedonia	111	Nepal	65	Kazakhstan	57	Russian Federation	111	98	Libya	128	The Democratic Republic of the Congo	111	185	Japan	111	143	130	COD
Ukraine	112	Netherlands	21	Kenya	135	Rwanda	112	133	St. Lucia	202	Burundi	112	177	Jersey	112	229	100	BDI
Algeria	113	Netherlands Antilles	9999	Kiribati	9999	Saudi Arabia	113	100	Liechtenstein	56	Tanzania	113	74	Jamaica	113	4	11	TZA
Angola	114	New Caledonia	66	Kuwait	169	Senegal	114	119	Sri Lanka	3	Angola	114	114	JAN_MAYEN	114	9	17	AGO
Bahamas	115	The former Yugoslav Republic of Macedonia	111	Kyrgyzstan	58	Singapore	115	21	Lesotho	21	Seychelles	115	7	Jordan	115	21	19	SYC
Benin	116	Vanuatu	78	Land Locked Developing Countries	9999	Slovakia	116	11	Lithuania	16	Malawi	116	99	JOHNSTON_ATOLL	116	27	27	MWI
Botswana	117	New Zealand	67	Lao People's Democratic Republic	59	Slovenia	117	13	Luxembourg	31	Mayotte	117	125	Kenya	117	18	42	MYT
Burkina Faso	118	Nicaragua	96	Latvia	19	South Africa	118	17	Latvia	17	Zambia	118	88	Kyrgyzstan	118	231	45	ZMB
Burundi	119	Niger	147	Least Developed Countries	9999	South Central Africa	119	96	Macao SAR, China	14	Madagascar	119	112	Democratic People's Republic of Korea	119	35	81	MDG
Cameroon	120	Nigeria	148	Lebanon	170	Spain	120	19	St. Martin (French part)	39	Mozambique	120	102	KIRIBATI	120	46	114	MOZ
Cape Verde	121	Norway	42	Lesotho	136	Sri Lanka	121	107	Morocco	44	Mauritius	121	85	Republic of Korea	121	53	128	MUS
Central African Republic	122	Pakistan	68	Liberia	137	Sweden	122	22	Monaco	32	Zimbabwe	122	96	CHRISTMAS_ISLAND	122	51	107	ZWE
Chad	123	Panama	97	Libya	138	Switzerland	123	22	Moldova	189	Reunion	123	93	Kuwait	123	38	22	REU
Congo	124	Czech Republic	5	Lithuania	17	Taiwan	124	22	Madagascar	41	Namibia	124	105	Kazakhstan	124	40	119	NAM
Côte d'Ivoire	125	Papua New Guinea	69	Low Income Food Deficit Countries	9999	Tajikistan	125	27	Maldives	38	Botswana	125	95	Lao People's Democratic Republic	125	109	37	BWA
DR Congo	126	Paraguay	98	Luxembourg	18	Tanzania	126	119	Mexico	40	Swaziland	126	111	Lebanon	126	41	59	SWZ
Djibouti	127	Peru	99	Madagascar	139	Thailand	127	96	Marshall Islands	52	Lesotho	127	91	Latvia	127	57	67	LSO
Dominican Republic	128	Philippines	70	Malawi	140	Togo	128	32	North Macedonia	55	South Africa	128	15	Lithuania	128	60	68	ZAF
Eritrea	129	Poland	22	Malaysia	61	Trinidad and Tobago	129	96	Mali	59	Saint Helena	129	89	Liberia	129	66	71	SHN
Ethiopia	130	Portugal	23	Maldives	62	Tunisia	130	37	Malta	62	Comoros	130	86	Slovakia	130	68	75	COM
Gabon	131	Guinea-Bissau	9999	Mali	141	Turkey	131	22	Myanmar	68	Canarias	131	107	Liechtenstein	131	80	112	ESP
Gambia	132	Timor-Leste	9999	Malta	20	Uganda	132	107	Montenegro	74	Madeira	132	87	Lesotho	132	79	126	PRT
Ghana	133	Puerto Rico	9999	Marshall Islands	9999	Ukraine	133	42	Mongolia	71	Venezuela	133	97	Luxembourg	133	82	132	VEN
Guinea	134	Eritrea	129	Martinique	9999	United Arab Emirates	134	45	Northern Mariana Islands	73	Guyana	134	92	Libyan Arab Jamahiriya	134	92	140	GUY
Kenya	135	Qatar	172	Mauritania	142	United Kingdom	135	59	Mozambique	101	Suriname	135	110	Madagascar	135	117	141	SUR
Lesotho	136	Zimbabwe	162	Mauritius	143	United States of America	136	103	Mauritania	115	French Guiana	136	127	Martinique	136	132	96	GUF
Liberia	137	Romania	24	Melanesia	9999	Uruguay	137	107	Mauritius	110	Ecuador	137	101	MACAU	137	129	13	ECU
Libya	138	Rwanda	149	Mexico	36	Venezuela	138	100	Malawi	111	Brazil	138	76	Republic of Moldova	138	134	76	BRA
Madagascar	139	Russian Federation	37	Micronesia	9999	Viet Nam	139	67	Malaysia	124	Bolivia	139	119	Mayotte	139	135	118	BOL
Malawi	140	Serbia and Montenegro	9999	Micronesia (Federated States of)	9999	Zambia	140	68	Namibia	138	Peru	140	116	Mongolia	140	142	103	PER
Mali	141	Saint Kitts and Nevis	9999	Middle Africa	9999	Zimbabwe	141	107	New Caledonia	129	Paraguay	141	80	MONTSERRAT	141	144	109	PRY
Mauritania	142	Saint Lucia	9999	Mongolia	63			107	Niger	136	Argentina	142	81	Malawi	142	149		ARG
Mauritius	143	Saint Vincent and the Grenadines	9999	Montenegro	108			71	Nigeria	137	Uruguay	143	121	The former Yugoslav Republic of Macedonia	143	147		URY
Morocco	144	Sao Tome and Principe	150	Morocco	144			74	Nicaragua	121	Chile	144	77	Mali	144	146		CHL
Mozambique	145	Saudi Arabia	173	Mozambique	145			75	Netherlands	135	Falkland Islands (Malvinas)	145	120	MONACO	145	162		FLK
Namibia	146	Senegal	151	Myanmar	64			76	Norway	140	Colombia	146	124	Morocco	146	239		COL
Niger	147	Sierra Leone	153	Namibia	146			107	Nepal	142	Svalbard and Jan Mayen	147	82	Mauritius	147	166		SJM
Nigeria	148	Slovenia	26	Nauru	9999			81	Nauru	143	Russian Federation	148	94	MIDWAY_ISLANDS	148	168		RUS
Rwanda	149	Slovakia	27	Nepal	65			112	New Zealand	167	Sweden	149	109	Mauritania	149	195		SWE
Sao Tome and Principe	150	Singapore	72	Net Food Importing Developing Countries	9999			22	Oman	179	Iceland	150	106	Malta	150	157		ISL
Senegal	151	Somalia	154	Netherlands (Kingdom of the)	21			114	Pakistan	170	Norway	151	84	Oman	151	200		NOR
Seychelles	152	South Africa	44	New Caledonia	66			96	Panama	186	Faroe Islands	152	115	Maldives	152	198		FRO
Sierra Leone	153	Spain	9	New Zealand	67			107	Peru	173	Finland	153	98	Montenegro	153	203		FIN
Somalia	154	Suriname	100	Nicaragua	96			96	Philippines	176	United Kingdom	154	108	Mexico	154	206		GBR
South Sudan	155	Tajikistan	74	Niger	147			96	Palau	178	Estonia	155	83	Malaysia	155	210		EST
Sudan	156	Swaziland	9999	Nigeria	148			96	Papua New Guinea	169	Latvia	156	83	Togo	156	210		LVA
Togo	157	Sweden	25	Niue	9999			128	Poland	190	Lithuania	157	100	Sao Tome and Principe	157	156		LTU
Tunisia	158	Switzerland	39	North Macedonia	111			130	Puerto Rico	197	Denmark	158	75	Turkey	158	222		DNK
Uganda	159	Syrian Arab Republic	174	Northern Africa	9999			132	Korea, Dem. People's Rep.	201	Belarus	159	103	Yemen	159	227		BLR
Tanzania	160	Turkmenistan	76	Northern America	9999			126	Portugal	200	Germany	160	113	Zambia	160	226		DEU
Zambia	161	China, Taiwan Province of	41	Northern Europe	9999			140	Paraguay	215	Netherlands	161	118	Zimbabwe	161	160		NLD
Zimbabwe	162	United Republic of Tanzania	160	Norway	42			141	West Bank and Gaza	216	Poland	162	122	Mozambique	162	161		POL
Bahrain	163	Thailand	75	Oceania	9999			7	French Polynesia	20	Ireland	163	214	New Caledonia	163	16		IRL
Egypt	164	Togo	157	Oman	171			34	Qatar	58	Belgium	164	78	Niue	164	62		BEL
Iran	165	Trinidad and Tobago	101	Pakistan	68			51	Romania	92	France	165	219	NORFOLK_ISLAND	165	106		FRA
Iraq	166	Oman	171	Palestine	9999			108	Russian Federation	93	Luxembourg	166	202	Niger	166	110		LUX
Israel	167	Tunisia	158	Panama	97			53	Rwanda	95	Czech Republic	167	217	Vanuatu	167	107		CZE
Jordan	168	Turkey	40	Papua New Guinea	69			57	Saudi Arabia	98	Slovakia	168	213	Nigeria	168	115		SVK
Kuwait	169	United Arab Emirates	176	Paraguay	98			61	Sudan	107	Moldova	169	203	Netherlands	169	123		MDA
Lebanon	170	Uganda	159	Peru	99			108	Senegal	109	Austria	170	200	Norway	170	126		AUT
Oman	171	USSR	175	Philippines	70			83	Singapore	150	Hungary	171	240	Nepal	171	151		HUN
Qatar	172	United Kingdom	28	Poland	22			92	Solomon Islands	164	Switzerland	172	215	Suriname	172	188		CHE
Saudi Arabia	173	Ukraine	112	Polynesia	9999			113	Sierra Leone	168	Liechtenstein	173	231	Netherlands Antilles	173	196		LIE
Syria	174	United States of America	29	Portugal	23			108	El Salvador	187	Slovenia	174	199	Nicaragua	174	214		SVN
Former USSR	175	Burkina Faso	118	Puerto Rico	9999			99	San Marino	9999	Romania	175	9999	New Zealand	175	194		ROM
United Arab Emirates	176	Uruguay	102	Qatar	172			134	Somalia	6	Serbia	176	235	Paraguay	176	216		SEB
Yemen	177	Uzbekistan	77	Republic of Korea	33			108	Serbia	213	Ukraine	177	222	PITCAIRN_ISLANDS	177	159		UKR
		Venezuela (Bolivarian Republic of)	103	Republic of Moldova	109				South Sudan		Bosnia and Herzegovina	178		Peru	178			BIH
		Viet Nam	79	Reunion	9999				São Tomé and Principe		Croatia	179		PARACEL_ISLANDS	179			HRV
		Ethiopia	130	Romania	24				Suriname		San Marino	180		Spratly Islands	180			SMR
		Samoa	71	Russian Federation	37				Slovak Republic		Monaco	181		Pakistan	181			MCO
		Yugoslav SFR	9999	Rwanda	149				Slovenia		Italy	182		Poland	182			ITA
		Yemen	177	Saint Kitts and Nevis	9999				Sweden		Bulgaria	183		Panama	183			BGR
		Democratic Republic of the Congo	126	Saint Lucia	9999				Eswatini		Andorra	184		Portugal	184			AND
		Zambia	161	Saint Vincent and the Grenadines	9999				Sint Maarten (Dutch part)		The Former Yugoslav Republic of Macedonia	185		Papua New Guinea	185			MKD
		Belgium	2	Samoa	71				Seychelles		Montenegro	186		Palau	186			YUG
		Luxembourg	18	Sao Tome and Principe	150				Syrian Arab Republic		Vatican	187		Guinea-Bissau	187			VAT
		Serbia	110	Saudi Arabia	173				Turks and Caicos Islands		Albania	188		Qatar	188			ALB
		Montenegro	108	Senegal	151				Chad		Greece	189		Réunion	189			GRC
		Sudan	156	Serbia	110				Togo		Gibraltar	190		MARSHALL_ISLANDS	190			GIB
		South Sudan	155	Serbia and Montenegro	9999				Thailand		Malta	191		Romania	191			MLT
		RoW	9999	Seychelles	152				Tajikistan		Portugal	192		Philippines	192			PRT
				Sierra Leone	153				Turkmenistan		Spain	193		Puerto Rico	193			ESP
				Singapore	72				Timor-Leste		<missing>	194		Russian Federation	194
				Slovakia	27				Tonga		Turkmenistan	195		Rwanda	195			TKM
				Slovenia	26				Trinidad and Tobago		<missing>	196		Saudi Arabia	196
				Small Island Developing States	9999				Tunisia		Kyrgyzstan	197		Saint Kitts and Nevis	197			KGZ
				Solomon Islands	9999				Türkiye		Armenia	198		Seychelles	198			ARM
				Somalia	154				Tuvalu		Syrian Arab Republic	199		South Africa	199			SYR
				South Africa	44				Tanzania		Lebanon	200		Senegal	200			LBN
				South America	9999				Uganda		Afghanistan	201		Saint Helena, Ascension and Tristan da Cunha	201			AFG
				South Sudan	155				Ukraine		Iraq	202		Slovenia	202			IRQ
				South-eastern Asia	9999				Uruguay		Kuwait	203		Sierra Leone	203			KWT
				Southern Africa	9999				United States		Nepal	204		San Marino	204			NPL
				Southern Asia	9999				Uzbekistan		Bhutan	205		Singapore	205			BTN
				Southern Europe	9999				St. Vincent and the Grenadines		Laos	206		Somalia	206			LAO
				Spain	9				British Virgin Islands		Maldives	207		Spain	207			MDV
				Sri Lanka	73				Virgin Islands (U.S.)		Brunei	208		Serbia	208			BRN
				Sudan	156				Viet Nam		East Timor	209		Saint Lucia	209			TMP
				Sudan (former)	9999				Vanuatu		Christmas Island	210		Sudan	210			CXR
				Suriname	100				Samoa		Mongolia	211		Svalbard and Jan Mayen Islands	211			MNG
				Sweden	25				Kosovo		Caspian Sea	212		Sweden	212
				Switzerland	39				Yemen, Rep.		Jordan	213		South Georgia and the South Sandwich Is	213			JOR
				Syrian Arab Republic	174				South Africa		Bahrain	214		Syrian Arab Republic	214			BHR
				Tajikistan	74				Zambia		Qatar	215		Switzerland	215			QAT
				Thailand	75				Zimbabwe		Georgia	216		United Arab Emirates	216			GEO
				Timor-Leste	9999						Israel	217		Trinidad and Tobago	217			ISR
				Togo	157						Cyprus	218		Thailand	218			CYP
				Tokelau	9999						Iran	219		Tajikistan	219			IRN
				Tonga	9999						Pakistan	220		Turks and Caicos Islands	220			PAK
				Trinidad and Tobago	101						Azerbaijan	221		Tonga	221			AZE
				Tunisia	158						Yemen	222		Tunisia	222			YEM
				Turkey	40						Bangladesh	223		TUVALU	223			BGD
				Turkmenistan	76						Singapore	224		Taiwan	224			SGP
				Tuvalu	9999						Kazakhstan	225		Turkmenistan	225			KAZ
				Uganda	159						Area Under Dispute	226		United Republic of Tanzania	226
				Ukraine	112						Cambodia	227		Uganda	227			KHM
				United Arab Emirates	176						Srilanka	228		United Kingdom	228			LKA
				United Kingdom of Great Britain and Northern Ireland	28						British Indian Ocean Territory	229		Ukraine	229			IOT
				United Republic of Tanzania	160						Tajikistan	230		United States of America	230			TJK
				United States of America	29						Saudi Arabia	231		Burkina Faso	231			SAU
				Uruguay	102						Myanmar	232		Uruguay	232			MMR
				USSR	175						Japan	233		Uzbekistan	233			JPN
				Uzbekistan	77						Republic of Korea	234		Saint Vincent and the Grenadines	234			KOR
				Vanuatu	78						United Arab Emirates	235		Venezuela (Bolivarian Republic of)	235			ARE
				Venezuela (Bolivarian Republic of)	103						Malaysia	236		British Virgin Islands	236			MYS
				Viet Nam	79						India	237		Viet Nam	237			IND
				Western Africa	9999						Indonesia	238		United States Virgin Islands	238			IDN
				Western Asia	9999						Philippines	239		Namibia	239			PHL
				Western Europe	9999						Oman	240		West Bank	240			OMN
				World	9999						Thailand	241		WALLIS_AND_FUTUNA	241			THA
				Yemen	177						Uzbekistan	242		Western Sahara	242			UZB
				Yugoslav SFR	9999						Turkey	243		WAKE_ISLAND	243			TUR
				Zambia	161						Democratic People's Republic of Korea	244		Samoa	244			PRK
				Zimbabwe	162						<missing>	245		Swaziland	245
											Viet Nam	246						VNM
											China	247						CHN

## Sheet: Foods
Item Code	Item	Food Code	CPC Code	Food Code	Commodity description	Food Code
101	Canary seed	0	1195	0	Paddy Rice	1
1016	Goats	0	2123	0	Wheat	2
1017	Meat of goat; fresh or chilled	0	21116	108	Other grains	3
1018	Edible offal of goat; fresh; chilled or frozen	0	21156	0	Horticulture	4
1019	Goat fat; unrendered	9	21515	9	Oil seeds	5
1020	Raw milk of goats	0	2292	110	Sugar beet/cane	6
1021	Cheese from milk of goats; fresh or processed	0	22254	0	Other crops	7
1022	Butter of goat milk	0	22249	0	Cattle	8
1025	Raw hides and skins of goats or kids	0	2954	9	Other animal products	9
103	Mixed grain	3	1199.02	3	Raw milk	10
1034	Swine / pigs	0	2140	0
1035	Meat of pig with the bone; fresh or chilled	0	21113	108
1036	Edible offal of pigs; fresh; chilled or frozen	0	21153	0
1037	Fat of pigs	9	21511	9
1043	Pig fat; rendered	0	21521	9
1057	Chickens	0	2151	0
1058	Meat of chickens; fresh or chilled	0	21121	108
1062	Hen eggs in shell; fresh	0	231	109
1068	Ducks	0	2154	0
1069	Meat of ducks; fresh or chilled	0	21122	108
1072	Geese	0	2153	0
1073	Meat of geese; fresh or chilled	0	21123	108
1079	Turkeys	0	2152	0
108	Cereals n.e.c.	3	1199.9	3
1080	Meat of turkeys; fresh or chilled	0	21124	108
1083	Other birds	0	2194	0
1089	Meat of pigeons and other birds n.e.c.; fresh; chilled or frozen	0	21170	108
1091	Eggs from other birds in shell; fresh; n.e.c.	0	232	109
1096	Horses	0	2131	0
1097	Horse meat; fresh or chilled	0	21118	108
1098	Edible offals of horses and other equines; fresh; chilled or frozen	0	21159	0
1107	Asses	0	2132	0
1108	Meat of asses; fresh or chilled	0	21118	108
1110	Mules and hinnies	0	2133	0
1111	Meat of mules; fresh or chilled	0	21118	108
1126	Camels	0	2121.01	0
1127	Meat of camels; fresh or chilled	0	21117	108
1128	Edible offals of camels and other camelids; fresh; chilled or frozen	0	21159	0
1129	Fat of camels	9	21519	9
1130	Raw milk of camel	0	2293	110
1140	Rabbits and hares	0	2191	0
1141	Meat of rabbits and hares; fresh or chilled	0	21114	108
1150	Other rodents	0	2192.01	0
1151	Meat of other domestic rodents; fresh or chilled	0	21119	108
1157	Other camelids	0	2121.02	0
1158	Meat of other domestic camelids; fresh or chilled	0	21117	108
116	Potatoes	0	1510	104
1163	Game meat; fresh; chilled or frozen	0	21170	108
1166	Other meat n.e.c. (excluding mammals); fresh; chilled or frozen	0	21170.9	108
1176	Snails; fresh; chilled; frozen; dried; salted or in brine; except sea snails	9	2920	9
1181	Bees	0	2196	0
1182	Natural honey	9	2910	9
1183	Beeswax	9	2960.01	9
1185	Silk-worm cocoons suitable for reeling	0	2944	0
1186	Raw silk (not thrown)	0	26110	0
122	Sweet potatoes	0	1530	104
1225	Tallow	9	21523	9
1242	Margarine and shortening	9	21700	110
125	Cassava; fresh	0	1520.01	104
135	Yautia	0	1591	104
136	Taro	0	1550	104
137	Yams	0	1540	104
149	Edible roots and tubers with high starch or inulin content; n.e.c.; fresh	0	1599.1	104
15	Wheat	2	111	2
156	Sugar cane	0	1802	106
157	Sugar beet	0	1801	106
161	Other sugar crops n.e.c.	0	1809	106
162	Raw cane or beet sugar (centrifugal only)	0	2351f	106
165	Molasses	0	23540	0
1714	Crops; primary	0	F1714	0
1717	Cereals; primary	0	F1717	0
1720	Roots and Tubers; Total	4	F1720	104
1723	Sugar Crops Primary	6	F1723	6
1726	Pulses; Total	4	F1726	104
1729	Treenuts; Total	4	F1729	104
1730	Oilcrops Primary	0	F1730	0
1732	Oilcrops; Oil Equivalent	5	F1732	5
1735	Vegetables Primary	4	F1735	4
1738	Fruit Primary	4	F1738	4
1745	Cheese (All Kinds)	0	F1745	0
1746	Cattle and Buffaloes	0	F1746	0
1749	Sheep and Goats	0	F1749	0
1753	Fibre Crops Primary	0	F1753	0
17530	Fibre Crops; Fibre Equivalent	0	F17530	0
1756	Live Animals	0	F1756	0
176	Beans; dry	0	1701	0
1765	Meat; Total	8	F1765	8
1777	Hides and skins; primary	9	F1777	0
1780	Milk; Total	10	F1780	10
1783	Eggs Primary	9	F1783	9
1804	Citrus Fruit; Total	0	F1804	104
1806	Beef and Buffalo Meat; primary	0	F1806	108
1807	Sheep and Goat Meat	0	F1807	108
1808	Meat; Poultry	0	F1808	108
1809	Skim Milk & Buttermilk; Dry	0	F1809	0
181	Broad beans and horse beans; dry	0	1702	104
1811	Butter and Ghee	9	F1811	0
1816	Evaporated & Condensed Milk	0	F1816	0
1841	Oilcrops; Cake Equivalent	0	F1841	0
187	Peas; dry	0	1705	0
191	Chick peas; dry	0	1703	0
195	Cow peas; dry	0	1706	0
197	Pigeon peas; dry	0	1707	0
201	Lentils; dry	0	1704	0
2029	Poultry Birds	0	F2029	0
203	Bambara beans; dry	0	1708	0
205	Vetches	0	1709.01	0
210	Lupins	0	1709.02	0
211	Other pulses n.e.c.	0	1709.9	0
216	Brazil nuts; in shell	0	1377	0
217	Cashew nuts; in shell	0	1372	0
220	Chestnuts; in shell	0	1373	0
221	Almonds; in shell	0	1371	0
222	Walnuts; in shell	0	1376	0
223	Pistachios; in shell	0	1375	0
224	Kola nuts	0	1379.02	0
225	Hazelnuts; in shell	0	1374	0
226	Areca nuts	0	1379.01	0
234	Other nuts (excluding wild edible nuts and groundnuts); in shell; n.e.c.	0	1379.9	0
236	Soya beans	0	141	105
237	Soya bean oil	0	2161	0
242	Groundnuts; excluding shelled	0	142	105
244	Groundnut oil	0	2162	0
249	Coconuts; in shell	0	1460	105
252	Coconut oil	0	2166	0
254	Oil palm fruit	0	1491.01	105
256	Palm kernels	0	1491.02	105
257	Palm oil	0	2165	0
258	Oil of palm kernel	0	21691.1	0
260	Olives	0	1450	105
261	Olive oil	0	2167	0
263	Karite nuts (sheanuts)	0	1499.01	0
265	Castor oil seeds	0	1447	105
267	Sunflower seed	0	1445	105
268	Sunflower-seed oil; crude	0	21631	0
27	Rice	1	113	1
270	Rape or colza seed	0	1443	105
271	Rapeseed or canola oil; crude	0	21641	105
275	Tung nuts	0	1499.02	0
277	Jojoba seeds	0	1499.03	0
280	Safflower seed	7	1446	105
281	Safflower-seed oil; crude	0	21631	0
289	Sesame seed	0	1444	105
290	Oil of sesame seed	0	21691.1	0
292	Mustard seed	0	1442	0
296	Poppy seed	0	1448	0
299	Melonseed	0	1449.01	0
305	Tallowtree seeds	0	1499.04	0
310	Kapok fruit	0	1499.05	0
311	Kapokseed in shell	0	1499.06	0
328	Seed cotton; unginned	0	1921.01	0
329	Cotton seed	0	143	105
331	Cottonseed oil	0	2168	0
333	Linseed	0	1441	105
334	Oil of linseed	0	21691.1	0
336	Hempseed	0	1449.02	0
339	Other oil seeds; n.e.c.	0	1449.9	105
358	Cabbages	0	1212	104
366	Artichokes	0	1216	104
367	Asparagus	0	1211	104
372	Lettuce and chicory	0	1214	104
373	Spinach	0	1215	104
378	Cassava leaves	0	1219.01	104
388	Tomatoes	0	1234	104
393	Cauliflowers and broccoli	7	1213	104
394	Pumpkins; squash and gourds	0	1235	104
397	Cucumbers and gherkins	0	1232	104
399	Eggplants (aubergines)	0	1233	104
401	Chillies and peppers; green (Capsicum spp. and Pimenta spp.)	0	1231	104
402	Onions and shallots; green	0	1253.01	104
403	Onions and shallots; dry (excluding dehydrated)	0	1253.02	104
406	Green garlic	0	1252	104
407	Leeks and other alliaceous vegetables	0	1254	104
414	Other beans; green	0	1241.9	0
417	Peas; green	0	1242	104
420	Broad beans and horse beans; green	0	1243	0
423	String beans	0	1241.01	104
426	Carrots and turnips	0	1251	104
430	Okra	0	1239.01	104
44	Barley	3	115	104
446	Green corn (maize)	0	1290.01	104
449	Mushrooms and truffles	0	1270	104
459	Chicory roots	0	1691	104
461	Locust beans (carobs)	0	1356	104
463	Other vegetables; fresh n.e.c.	0	1290.9	104
486	Bananas	0	1312	104
489	Plantains and cooking bananas	0	1313	104
490	Oranges	0	1323	104
495	Tangerines; mandarins; clementines	0	1324	104
497	Lemons and limes	0	1322	104
507	Pomelos and grapefruits	0	1321	104
51	Beer of barley; malted	0	24310	104
512	Other citrus fruit; n.e.c.	0	1329	104
515	Apples	0	1341	104
521	Pears	0	1342.01	104
523	Quinces	0	1342.02	104
526	Apricots	0	1343	104
530	Sour cherries	0	1344.01	104
531	Cherries	0	1344.02	104
534	Peaches and nectarines	0	1345	104
536	Plums and sloes	0	1346	104
541	Other stone fruits	0	1349.2	104
542	Other pome fruits	0	1349.1	104
544	Strawberries	0	1354	104
547	Raspberries	0	1353.01	104
549	Gooseberries	0	1351.02	104
550	Currants	0	1351.01	104
552	Blueberries	0	1355.01	104
554	Cranberries	0	1355.02	104
558	Other berries and fruits of the genus vaccinium n.e.c.	0	1355.9	104
56	Maize (corn)	3	112	104
560	Grapes	0	1330	104
564	Wine	0	24212	0
567	Watermelons	0	1221	104
568	Cantaloupes and other melons	0	1229	104
569	Figs	0	1315	104
571	Mangoes; guavas and mangosteens	0	1316	104
572	Avocados	0	1311	104
574	Pineapples	0	1318	104
577	Dates	0	1314	104
587	Persimmons	0	1359.01	104
591	Cashewapple	0	1359.02	104
592	Kiwi fruit	0	1352	104
60	Oil of maize	0	21691	0
600	Papayas	0	1317	104
603	Other tropical fruits; n.e.c.	0	1319	104
619	Other fruits; n.e.c.	0	1359.9	104
656	Coffee; green	7	1610	7
661	Cocoa beans	7	1640	7
667	Tea leaves	7	1620	7
671	Maté leaves	7	1630	7
675	Green tea (not fermented); black tea (fermented) and partly fermented tea; in immediate packings of a content not exceeding 3 kg	7	23913	7
677	Hop cones	0	1659	0
687	Pepper (Piper spp.); raw	7	1651	7
689	Chillies and peppers; dry (Capsicum spp.; Pimenta spp.); raw	7	1652	7
692	Vanilla; raw	7	1658	7
693	Cinnamon and cinnamon-tree flowers; raw	7	1655	7
698	Cloves (whole stems); raw	7	1656	7
702	Nutmeg; mace; cardamoms; raw	7	1653	7
71	Rye	3	116	3
711	Anise; badian; coriander; cumin; caraway; fennel and juniper berries; raw	7	1654	7
720	Ginger; raw	7	1657	7
723	Other stimulant; spice and aromatic crops; n.e.c.	7	1699	7
748	Peppermint; spearmint	7	1930.01	7
75	Oats	3	117	3
754	Pyrethrum; dried flowers	7	1930.02	7
767	Cotton lint; ginned	0	1921.02	0
771	Flax; raw or retted	0	1929.01	0
777	True hemp; raw or retted	0	1929.02	0
778	Kapok fibre; raw	0	1929.03	0
780	Jute; raw or retted	0	1922.01	0
782	Kenaf; and other textile bast fibres; raw or retted	0	1922.02	0
788	Ramie; raw or retted	0	1929.04	0
789	Sisal; raw	0	1929.05	0
79	Millet	3	118	3
800	Agave fibres; raw; n.e.c.	0	1929.06	0
809	Abaca; manila hemp; raw	0	1929.07	0
813	Coir; raw	0	1929.08	0
821	Other fibre crops; raw; n.e.c.	0	1929.9	0
826	Unmanufactured tobacco	7	1970	7
83	Sorghum	3	114	3
836	Natural rubber in primary forms	7	1950.01	7
839	Balata; gutta-percha; guayule; chicle and similar natural gums in primary forms or in plates; sheets or strip	7	3211	7
866	Cattle	0	2111	0
867	Meat of cattle with the bone; fresh or chilled	0	21111	108
868	Edible offal of cattle; fresh; chilled or frozen	0	21151	0
869	Cattle fat; unrendered	0	21512	9
882	Raw milk of cattle	0	2211	110
885	Cream; fresh	0	22120	0
886	Butter of cow milk	0	22241	0
887	Ghee from cow milk	0	22241	0
888	Skim milk of cows	0	22110	0
889	Whole milk; condensed	0	22222	0
89	Buckwheat	3	1192	3
890	Whey; condensed	0	22130	0
891	Yoghurt	0	22230	0
894	Whole milk; evaporated	0	22221	0
895	Skim milk; evaporated	0	22221	0
896	Skim milk; condensed	0	22222	0
897	Whole milk powder	0	22211	0
898	Skim milk and whey powder	0	22212	0
899	Buttermilk; dry	0	22230	0
900	Whey; dry	0	22130	0
901	Cheese from whole cow milk	0	22251	0
904	Cheese from skimmed cow milk	0	22251	0
919	Raw hides and skins of cattle	0	2951.01	9
92	Quinoa	7	1194	7
94	Fonio	0	1193	104
946	Buffalo	0	2112	0
947	Meat of buffalo; fresh or chilled	0	21112	108
948	Edible offal of buffalo; fresh; chilled or frozen	0	21152	0
949	Buffalo fat; unrendered	0	21513	9
951	Raw milk of buffalo	0	2212	110
952	Butter of buffalo milk	0	22242	0
953	Ghee from buffalo milk	0	22242	0
955	Cheese from milk of buffalo; fresh or processed	0	22252	0
957	Raw hides and skins of buffaloes	0	2951.03	9
97	Triticale	0	1191	9
976	Sheep	0	2122	0
977	Meat of sheep; fresh or chilled	0	21115	108
978	Edible offal of sheep; fresh; chilled or frozen	0	21155	0
979	Sheep fat; unrendered	0	21514	9
982	Raw milk of sheep	0	2291	110
983	Butter and ghee of sheep milk	0	22249	0
984	Cheese from milk of sheep; fresh or processed	0	22253	0
987	Shorn wool; greasy; including fleece-washed shorn wool	0	2941	0
995	Raw hides and skins of sheep or lambs	0	2953	9

## Sheet: Continents
RMRIO	num1	Continents	Northern America & Oceania	NAM & OC	1
Austria	1	2	Europe	EU	2
Belgium	2	2	Western Asia & Northern Africa	WA & NAF	3
Bulgaria	3	2	Latin America & the Caribbean	LAM & CAR	4
Cyprus	4	2	Central Asia & Southern Asia	CA & SA	5
Czech Republic	5	2	Eastern Asia & South-eastern Asia	EA & SEA	6
Germany	6	2	Sub-Saharan Africa	SSAF	7
Denmark	7	2
Estonia	8	2
Spain	9	2
Finland	10	2
France	11	2
Greece	12	2
Croatia	13	2
Hungary	14	2
Ireland	15	2
Italy	16	2
Lithuania	17	2
Luxembourg	18	2
Latvia	19	2
Malta	20	2
Netherlands	21	2
Poland	22	2
Portugal	23	2
Romania	24	2
Sweden	25	2
Slovenia	26	2
Slovakia	27	2
UK	28	2
USA	29	1
Japan	30	6
China	31	6
Canada	32	1
South Korea	33	6
Brazil	34	4
India	35	5
Mexico	36	4
Russia	37	2
Australia	38	1
Switzerland	39	2
Turkey	40	3
Taiwan	41	6
Norway	42	2
Indonesia	43	6
South Africa	44	7
Afghanistan	45	5
Armenia	46	3
Azerbaijan	47	3
Bangladesh	48	5
Bhutan	49	5
Brunei	50	6
Cambodia	51	6
North Korea	52	6
Fiji	53	1
French Polynesia	54	1
Georgia	55	3
Hong Kong	56	6
Kazakhstan	57	5
Kyrgyzstan	58	5
Laos	59	6
Macao SAR	60	6
Malaysia	61	6
Maldives	62	5
Mongolia	63	6
Myanmar	64	6
Nepal	65	5
New Caledonia	66	1
New Zealand	67	1
Pakistan	68	5
Papua New Guinea	69	1
Philippines	70	6
Samoa	71	1
Singapore	72	6
Sri Lanka	73	5
Tajikistan	74	5
Thailand	75	6
Turkmenistan	76	5
Uzbekistan	77	5
Vanuatu	78	1
Viet Nam	79	6
Antigua	80	4
Argentina	81	4
Barbados	82	4
Belize	83	4
Bolivia	84	4
Chile	85	4
Colombia	86	4
Costa Rica	87	4
Cuba	88	4
Ecuador	89	4
El Salvador	90	4
Guatemala	91	4
Guyana	92	4
Haiti	93	4
Honduras	94	4
Jamaica	95	4
Nicaragua	96	4
Panama	97	4
Paraguay	98	4
Peru	99	4
Suriname	100	4
Trinidad and Tobago	101	4
Uruguay	102	4
Venezuela	103	4
Albania	104	2
Belarus	105	2
Bosnia and Herzegovina	106	2
Iceland	107	2
Montenegro	108	2
Moldova	109	2
Serbia	110	2
North Macedonia	111	2
Ukraine	112	2
Algeria	113	3
Angola	114	7
Bahamas	115	4
Benin	116	7
Botswana	117	7
Burkina Faso	118	7
Burundi	119	7
Cameroon	120	7
Cabo Verde	121	7
Central African Republic	122	7
Chad	123	7
Congo	124	7
Côte d'Ivoire	125	7
DR Congo	126	7
Djibouti	127	7
Dominican Republic	128	4
Eritrea	129	7
Ethiopia	130	7
Gabon	131	7
Gambia	132	7
Ghana	133	7
Guinea	134	7
Kenya	135	7
Lesotho	136	7
Liberia	137	7
Libya	138	7
Madagascar	139	7
Malawi	140	7
Mali	141	7
Mauritania	142	7
Mauritius	143	7
Morocco	144	3
Mozambique	145	7
Namibia	146	7
Niger	147	7
Nigeria	148	7
Rwanda	149	7
Sao Tome and Principe	150	7
Senegal	151	7
Seychelles	152	7
Sierra Leone	153	7
Somalia	154	7
South Sudan	155	7
Sudan	156	3
Togo	157	7
Tunisia	158	3
Uganda	159	7
Tanzania	160	7
Zambia	161	7
Zimbabwe	162	7
Bahrain	163	3
Egypt	164	3
Iran	165	5
Iraq	166	3
Israel	167	3
Jordan	168	3
Kuwait	169	3
Lebanon	170	3
Oman	171	3
Qatar	172	3
Saudi Arabia	173	3
Syria	174	3
Former USSR	175	3
United Arab Emirates	176	3
Yemen	177	3
